# Supplementary material
Source: PubMed Central journal article supplement (PMC6700869)
Supplement: Supplemental_Files_BRN.pdf [file Supplemental_Files_BRN.pdf]

## Supplemental Figure 1. Anxiety Search Results

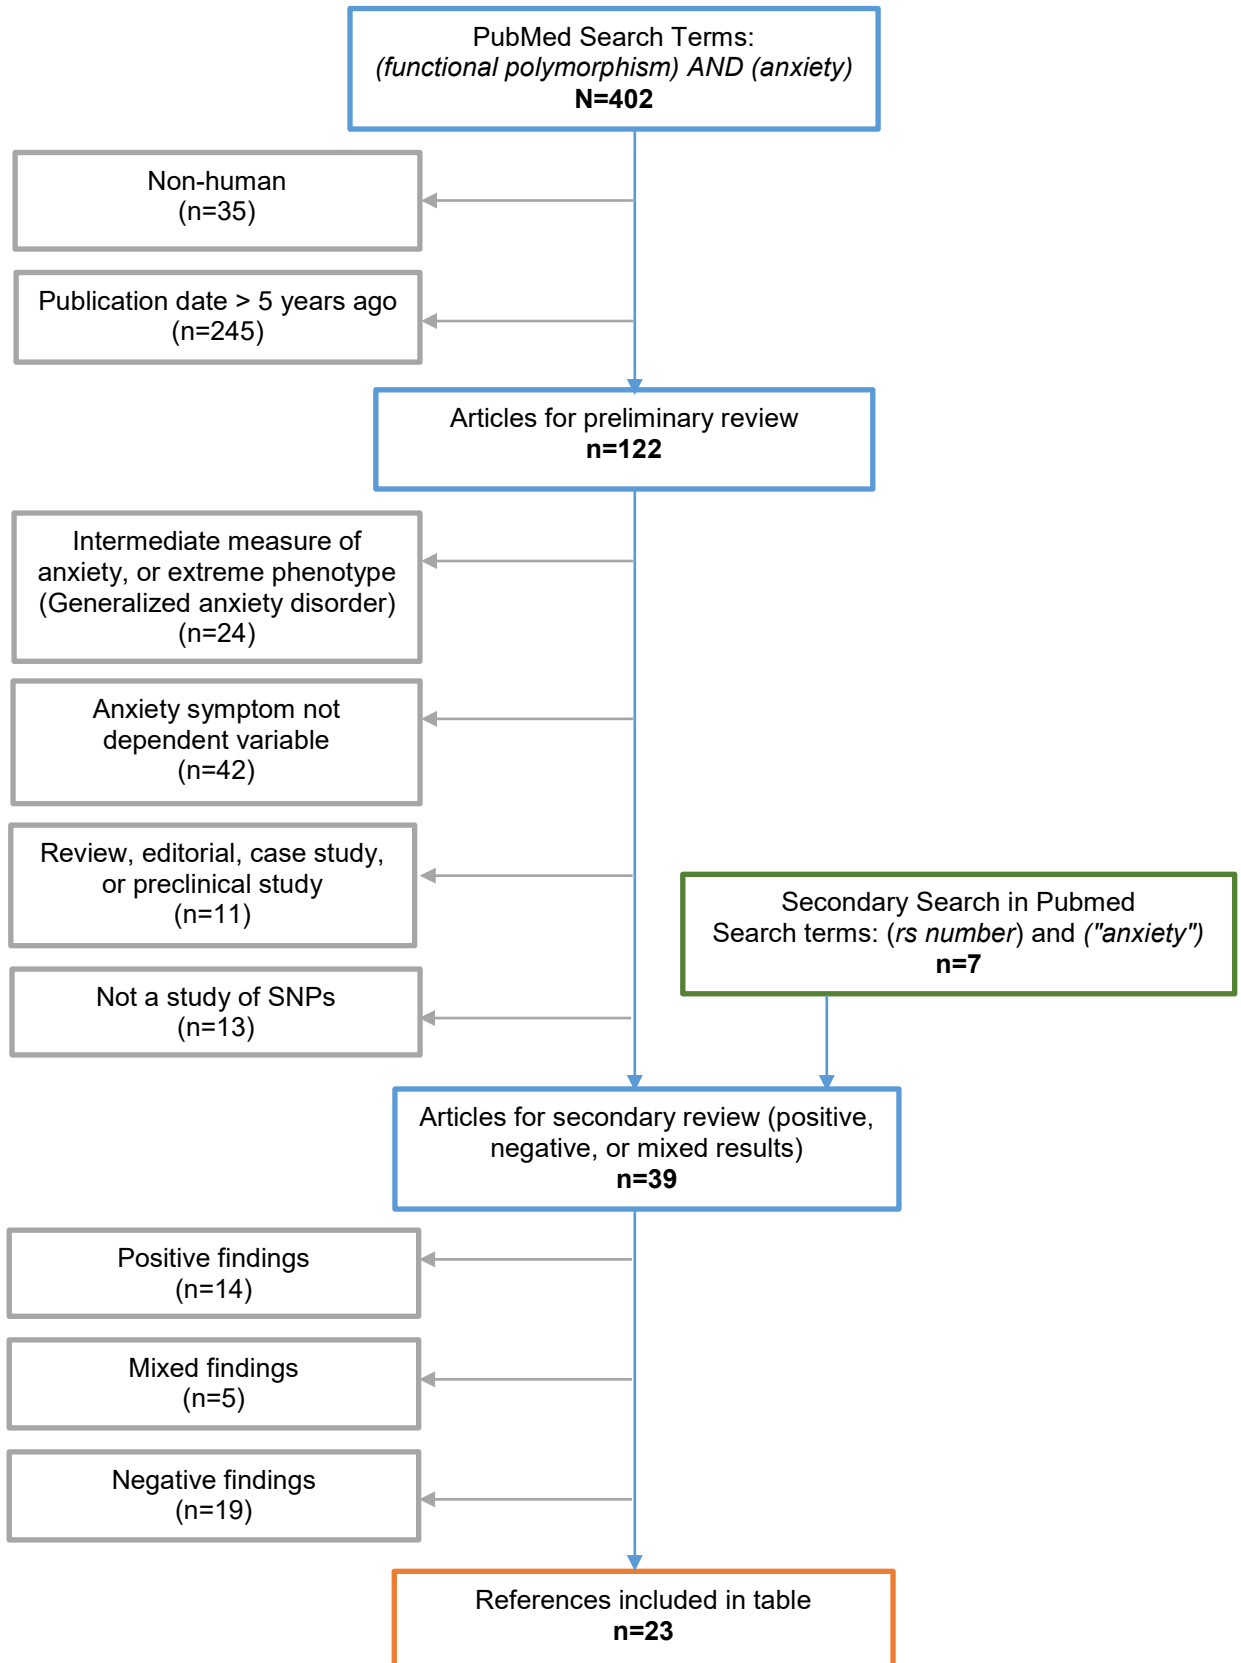

**Notes:** Because of the vast amount of work done examining anxiety and the large number of studies returned from initial PubMed searches, “functional polymorphism” rather than “polymorphism” was used in the preliminary search. Of 402 English-language studies found using the search terms called out above, 35 non-human studies were removed and an additional 245 studies greater than 5 years old were removed. Given the focus of this synthesis, articles were excluded for a variety of reasons outlined above. While the studies identified used a variety of tools to measure severity of anxiety symptoms, “intermediate” measures of anxiety were ultimately removed. The following were considered intermediate measures of anxiety: social interaction anxiety, neuroticism, fear (i.e. startle response), emotional and sympathetic responses (i.e. skin conductance, cortisol levels), trait worry, harm avoidance, stress response, phobic anxiety. Additionally, it is important to note that studies in which the population examined included persons with generalized anxiety disorder (GAD) were excluded because this population was considered an extreme phenotype of anxiety. Furthermore, studies measuring “trait anxiety” were not included because this measure is considered “ingrained” and thus likely not modifiable.

Supplemental Table1. Evidence of Associations between Symptoms of Anxiety and Genetic Polymorphisms

| Author, Year, Country           | Gene    | Polymorphism | Anxiety Symptom Severity Tool                                | Context (i.e., sample details)                                                                                                                                                                                                                                                                                                             | Relevant Findings                                                                                                                                                                                                                                                                                                                                                                                                                                                                             |
|---------------------------------|---------|--------------|--------------------------------------------------------------|--------------------------------------------------------------------------------------------------------------------------------------------------------------------------------------------------------------------------------------------------------------------------------------------------------------------------------------------|-----------------------------------------------------------------------------------------------------------------------------------------------------------------------------------------------------------------------------------------------------------------------------------------------------------------------------------------------------------------------------------------------------------------------------------------------------------------------------------------------|
| Quast et al., 2014, Germany     | AKR1C1  | rs3930965    | Panic and Agoraphobia Scale (PAS)                            | <p><u>Cohort 1:</u><br/>- n=522 participants with panic disorder; 69% female; mean age 37.1 ± 11.4 years</p>                                                                                                                                                                                                                               | Participants with the rs3930965 G/G genotype had significantly less anticipatory anxiety than those in the G/C and C/C groups ( $p=4.33 \times 10^{-4}$ after correcting for multiple testing).                                                                                                                                                                                                                                                                                               |
|                                 |         | rs41314625   |                                                              | <p><u>Cohort 2:</u><br/>- n=290 participants with panic disorder; 71% female; mean age 36.1 ± 10.9 years</p> <p><u>Healthy controls:</u><br/>- n=573 healthy individuals; 74% female</p>                                                                                                                                                   | Participants with the rs41314625 G/G genotype had significantly less anticipatory anxiety than those in the G/A and A/A groups ( $p=8.00 \times 10^{-4}$ after correcting for multiple testing).                                                                                                                                                                                                                                                                                              |
| Konishi et al., 2014, Japan     | BDNF    | rs6265       | State-Trait Anxiety Inventory (STAI)                         | <p>- n= 470 participants with panic disorder; 62% female; mean age 37.9 ± 11.1 years</p> <p>- n=458 healthy controls; 57% female; mean age 36.6 ± 13.9 years</p>                                                                                                                                                                           | A gene × gene × gender interaction was observed in the association of the BDNF (rs6265) and COMT (rs4680) polymorphisms with STAI-state scores ( $p=0.018$ ) in participants with panic disorder.                                                                                                                                                                                                                                                                                             |
| Marusak et al., 2016, USA       | BDNF    | rs6265       | Screen for Child Anxiety Related Emotional Disorders (SCR-C) | <p>- n=55</p> <p>- Trauma group: 41.7% female; mean age 12.2 ± 2.3 years; 42.9% African American</p> <p>- Comparison group: 70.6% female; mean age 11.4 ± 2.6 years; 41.2% African American</p>                                                                                                                                            | Anxiety levels did not differ based on BDNF rs6265 genotype.                                                                                                                                                                                                                                                                                                                                                                                                                                  |
| Svetel et al., 2013, Serbia     | BDNF    | rs6265       | Hamilton Anxiety Rating Scale (HARS)                         | <p>- n=177 Serbian patients with Parkinson's Disease; 33% female; mean age 58.9 ± 10.9 years</p> <p>- n=366 Controls (demographics not provided)</p>                                                                                                                                                                                       | The BDNF rs6265 genotype did not influence anxiety in persons with Parkinson's Disease.                                                                                                                                                                                                                                                                                                                                                                                                       |
| Pasparakis et al., 2015, Greece | CACNA1C | rs1006737    | Visual Analogue Scale (VAS) anxiety                          | <p>- n=194 healthy, right handed males</p> <p>- 100% Caucasian</p> <p>- established groups based on genotype (GG: 111; GA: 67; AA: 16)</p>                                                                                                                                                                                                 | <p>At baseline, anxiety did not differ based on genotype groups (<math>p&gt;0.05</math>).</p> <p>Following administration of instructions, the risk allele homozygotes (A/A) had a marked elevation of anxiety, evidenced by a genotype by occasion interaction [<math>F(2,191)=15.3, p&lt;0.001, \eta^2=0.136, \text{power}=0.99</math>] and a genotype main effect [<math>F(2,191)=7.3, p&lt;0.001, \eta_p^2=0.070, \text{power}=0.93</math>] confirmed with Bonferroni post hoc tests.</p> |
| Sasaki et al., 2016, Japan      | CHR     | rs10474485   | STAI                                                         | <p>- Japanese sample</p> <p>- n=111 participants with irritable bowel syndrome; 58% female; mean age 21.9 ± 2 years</p> <p>- n=142 healthy controls; 46% female; mean age 22 ± 2.3 years</p> <p>- Japanese</p>                                                                                                                             | Female A allele non-carriers showed significantly higher STAI-state ( $p=0.035$ ). No difference was found in males.                                                                                                                                                                                                                                                                                                                                                                          |
| Nees et al., 2013, Germany      | CHRNA3  | rs578776     | Anxiety Sensitivity Index (ASI)                              | <p>- Healthy adolescents from Germany, United Kingdom, Ireland, and France.</p> <p><u>Cohort 1:</u><br/>- n=487 non-smoking adolescents; 47% female; mean age 14.3 ± 0.3 years; 100% Caucasian</p> <p><u>Cohort 2 (replication cohort):</u><br/>- n=512 non-smoking individuals; 43% female; mean age 14.7 ± 0.3 years; 100% Caucasian</p> | <p><u>Cohort 1:</u> Participants with the G/G genotype compared with A/G+A/A genotypes had significantly higher scores of anxiety sensitivity (<math>p=0.037</math>)</p> <p><u>Cohort 2:</u> No significant association between genotype and anxiety sensitivity was found in the replication group (<math>p&gt;0.05</math>)</p>                                                                                                                                                              |

|                                            |       |           |                                                                                                   |                                                                                                                                                                                                                                                                                                                                  |                                                                                                                                                                                                                                                                                                                                                                                                                                                               |
|--------------------------------------------|-------|-----------|---------------------------------------------------------------------------------------------------|----------------------------------------------------------------------------------------------------------------------------------------------------------------------------------------------------------------------------------------------------------------------------------------------------------------------------------|---------------------------------------------------------------------------------------------------------------------------------------------------------------------------------------------------------------------------------------------------------------------------------------------------------------------------------------------------------------------------------------------------------------------------------------------------------------|
|                                            |       |           |                                                                                                   | <i>Note: samples partly overlap (n&gt;300)</i>                                                                                                                                                                                                                                                                                   |                                                                                                                                                                                                                                                                                                                                                                                                                                                               |
| Fernández-De-Las-Peñas et al., 2012, Spain | COMT  | rs4680    | Hospital Anxiety and Depression Scale (HADS)                                                      | - n=100 women diagnosed with fibromyalgia syndrome; mean age 52 ± 8 years                                                                                                                                                                                                                                                        | Post hoc comparisons with Holm-Bonferroni correction demonstrated women with fibromyalgia syndrome with the Met/Met genotype exhibited higher anxiety (F=13.385, p<0.001) than those with Val/Met and Val/Val genotype.                                                                                                                                                                                                                                       |
| Mutschler et al., 2014, Switzerland        | COMT  | rs4680    | STAI                                                                                              | - n=97 healthy females; mean age 23.6 years; 100% Caucasian<br><br>- participant's anxiety was measured at baseline and again during MRI scanner delivered echoplanar imaging (EPI) stimuli presentation                                                                                                                         | At baseline (pre-MRI) Val/Val, Met/Met, and Val/Met carriers did not differ in terms of state-anxiety scores (F[2,94]=0.397, p=0.673, $\eta_p^2=0.008$ ).<br><br>On average, Val/Val carriers, but not other participants, became more anxious during fMRI session. Participants with the Val/Val genotype had significantly higher state-anxiety compared to combined Val/Met and Met/Met group (F[1,95]=8.96, p=0.004, $\eta_p^2=0.086$ ).                  |
| Pardo-Lozano et al., 2012, Spain           | COMT  | rs4680    | Evaluation of the Subjective Effects of Substances with Abuse Potential (VESSPA) Anxiety subscale | - n=27 healthy adults with recreational use of ecstasy (MDMA) on at least ten occasions (two in the previous year); 44% female; 100% Caucasian<br><br>- EM phenotype for CYP2D6 activity determined using dextromethorphan as a selective drug probe<br><br>- participants were given a single oral weight-adjusted dose of MDMA | Met/* allele carriers had significantly higher anxiety at 24 hours [AUC <sub>0-24 h</sub> (p=0.025)] than Val/Val carriers.                                                                                                                                                                                                                                                                                                                                   |
| Sheikh et al., 2013, Canada                | COMT  | rs4680    | Preschool Age Psychiatric Assessment (PAPA) (anxiety score based on maternal interview)           | <u>Cohort 1:</u><br>- n=413 pre-school aged children in Long Island, NY; 47% female; mean age 42.2 ± 3.1 months; 87.1% Caucasian                                                                                                                                                                                                 | Preschool-aged children with the Val/Val genotype were found to have higher levels of anxiety as measured by the PAPA (p<0.05)                                                                                                                                                                                                                                                                                                                                |
|                                            |       |           | Early Childhood Inventory-4 (ECI-4); parental interview                                           | - n=362 pre-school aged children in Ontario, Canada; 51% female; mean age 43.2 ± 3.6 months; 90.5% Caucasian                                                                                                                                                                                                                     | No statistically significant relationship was found between genotype and level of anxiety as measured by ECI-4 (p>0.10)                                                                                                                                                                                                                                                                                                                                       |
| Comasco et al., 2015, Sweden               | FKBP5 | rs3800373 | Trauma Symptom Checklist for Children (TSCC)                                                      | - n=394 adolescents in "victimized" environment; 45.7% female; mean age 17.2 ± 0.7 years                                                                                                                                                                                                                                         | Interaction effects between rs3800373 and environment were present (p=0.025). [See detailed results in referenced study in supplemental table 6b (Comasco et al., 2015)]                                                                                                                                                                                                                                                                                      |
|                                            |       | rs1360780 |                                                                                                   | Interaction effects between rs1360780 and environment were identified (p=0.023). [See detailed results in the referenced study in supplemental table 6b (Comasco et al., 2015)]                                                                                                                                                  |                                                                                                                                                                                                                                                                                                                                                                                                                                                               |
| Udina et al., 2013, Spain                  | IL-6  | rs1800795 | HADS                                                                                              | - n=385 outpatients with Chronic Hepatitis C; 44% female; mean age 44.2 ± 10.2 years; 100% Caucasian<br><br>- candidates to receive interferon alpha and ribavirin treatment                                                                                                                                                     | At baseline, there was no difference in anxiety based on genotype (p=0.13). During antiviral treatment, participants with the C/C genotype had significantly lower changes from baseline in IFN-induced anxiety (1.34; [0.43,2.25]; p=0.004).<br><br>The mean scores differed significantly from baseline from week 24 onwards among G/C and G/G subjects (p=0.007) but did not change significantly over time among C/C subjects (p>0.2 at all-time points). |
| Beste et al., 2013, Germany                | NSPR1 | rs324981  | ASI (German version)<br><br>STAI                                                                  | - n=97 healthy adults; 69% female; mean age 25.2 ± 6 years; 100% Caucasian                                                                                                                                                                                                                                                       | A statistically significant relationship between genotype and ASI score was identified. Participants with the A/A genotype had significantly lower ASI scores (F[2,94]=5.12; p=0.017; $\eta_p^2=0.08$ ). The A/T and T/T genotype groups did not significantly differ from each other (p>0.9).<br><br>No significant relationship between NSPR1 genotype groups and STAI-state was found (r<0.1, p>0.5).                                                      |

|                                     |        |                   |                                                    |                                                                                                                                                                                                                                                               |                                                                                                                                                                                                                                                                                                                                                                                                                                                       |
|-------------------------------------|--------|-------------------|----------------------------------------------------|---------------------------------------------------------------------------------------------------------------------------------------------------------------------------------------------------------------------------------------------------------------|-------------------------------------------------------------------------------------------------------------------------------------------------------------------------------------------------------------------------------------------------------------------------------------------------------------------------------------------------------------------------------------------------------------------------------------------------------|
| Guhn et al., 2015, Germany          | NSPR1  | rs324981          | ASI<br>STAI                                        | - n=64 healthy volunteers; 50% female; mean age 25.4 ± 4.8 years; 100% Caucasian                                                                                                                                                                              | No significant relationship between NSPR1 genotype and ASI ( $p=0.105$ ) or STAI-state ( $p=0.9$ ).                                                                                                                                                                                                                                                                                                                                                   |
| Laas et al., 2014, Estonia          | NSPR1  | rs324981          | STAI                                               | - Data originated in European Youth Heart study that consists of 2 birth cohorts (i.e., young & older)<br>- study carried out in Estonian sample (n = 1176 [ n=583 in younger cohort with mean age 9.6 years; n=593 in older cohort with mean age 15.6 years) | No significant relationship between NSPR1 and STAI-state anxiety alone was found<br><br>However, when considering interaction models, there was a statistically significant difference between genotype groups. Positive interactions included, NSPR1 genotype and warmth ( $p=0.015$ ), maltreatment ( $p=0.005$ ), and stressful life events ( $p=0.023$ ). Detailed results are presented in table 5 of the referenced article.(Laas et al., 2014) |
| Tupak et al., 2013, Germany         | NSPR1  | rs324981          | ASI                                                | - n=92 healthy, right handed, German adults; 66% female; mean age 24.4 ± 3.5 years                                                                                                                                                                            | Anxiety did not differ between genotype groups ( $p=0.518$ ).                                                                                                                                                                                                                                                                                                                                                                                         |
| Chang et al., 2017, Taiwan          | SLC6A4 | 5-HTTLPR /rs25531 | Beck Anxiety Inventory (BAI)                       | - n=1139 healthy Han Chinese individuals; 52% female; mean age 38.3 ± 10.3 years                                                                                                                                                                              | S'S' homozygotic men had higher anxiety as measured by the BAI.                                                                                                                                                                                                                                                                                                                                                                                       |
| Hemmings et al., 2016, South Africa | SLC6A4 | 5-HTTLPR /rs25531 | ASI                                                | - n=951 South African adolescents (two ethnically diverse populations: n=634 Xhosa; n=317 Coloured)                                                                                                                                                           | The 5-HTTLPR-rs25531 L-G haplotype associated with reduced anxiety sensitivity among Xhosa adolescents ( $p= 0.010$ ).                                                                                                                                                                                                                                                                                                                                |
|                                     |        | rs1042173         |                                                    |                                                                                                                                                                                                                                                               | The rs1042173 CC-genotype was protective against increased levels of anxiety sensitivity in Xhosa participants who had experienced increased levels of childhood trauma ( $p = 0.038$ ).<br><br>Additionally, Coloured males homozygous for the S-allele had increased anxiety sensitivity levels compared with Coloured males with at least one L-allele ( $p= 0.016$ ).                                                                             |
| Park et al., 2015, South Korea      | SLC6A4 | rs25531           | Multidimensional Anxiety Scale for Children (MASC) | - n=64 offspring of persons with bipolar disorder; 53% female; mean age 13.7 ± 3.5 years; 9.4% non-Caucasians<br>- n=51 healthy controls; 55% female; mean age 13.7 ± 2.7 years; 39.2% non-Caucasian                                                          | Offspring of persons with Bipolar disorder whom were naïve to antianxiety medication were found to have an association between 5-HTTLPR genotypes and anxiety symptoms; those with the s-allele showed higher level of overall anxiety than offspring of BD parents with the l/l genotype. No significant differences in anxiety symptoms or their association with the 5-HTTLPR genotype were found in the healthy control group.                    |
| Wilhelm et al., 2012, Australia     | SLC6A4 | rs25531           | Patient Health Questionnaire (PHQ)                 | - n=234 patients with diabetes mellitus; 43% female; mean age 57.4 ± 13.5 years                                                                                                                                                                               | The 5-HTTLPR/rs25531 genotype is associated with psychological distress in a sample of persons with diabetes.                                                                                                                                                                                                                                                                                                                                         |
| Miaskowski et al., 2016, USA        | TNFA   | rs1799964         | STAI                                               | - n=398 women with breast cancer<br>- Participants were divided into two distinct latent classes of anxiety trajectories (low versus high)                                                                                                                    | Controlling for age and rs3093662 genotype, carrying two of the rare C allele (T/T+T/C vs. C/C) was associated with an 88% reduction in the odds of belonging to the higher anxiety class. 0.12 (0.03-0.471) $p=0.002$                                                                                                                                                                                                                                |
|                                     |        | rs3093662         |                                                    | - Lower anxiety class (n=147): mean age 57.5 ± 11.5 years; 77% White<br>- Higher anxiety class (n=251): mean age 53.4 ± 11.3 years; 57.2% White                                                                                                               | Controlling for age and rs1799964, carrying 1 or 2 doses of the rare G allele (A/A vs. A/G+G/G) in TNFA rs3093662 was associated with a 4.04 increase in odds of belonging to the higher anxiety class. 4.04 (1.694-9.623), $p=0.002$<br><br>Overall model fit: $\chi^2=42.81$ , $p<0.0001$                                                                                                                                                           |
| Kovacs-Nagy et al., 2013            | WFS1   | rs1046322         | HADS                                               | - n=801 healthy adults; 100% Caucasian (Hungarian)                                                                                                                                                                                                            | Participants with the homozygous form of the rs1046322 minor allele (mm) reported significantly higher anxiety ( $F[1,797]=7.801$ , $p=0.005$ , $\eta_p^2=0.01$ , Power=0.797)                                                                                                                                                                                                                                                                        |

**Abbreviations:**

PAS: Panic and Agoraphobia Scale

STAI: State-trait Anxiety Inventory

SCR-C: Screen for Child Anxiety Related Emotional Disorders

HARS: Hamilton Anxiety Rating Scale

VAS: Visual Analogue Scale

ASI: Anxiety Sensitivity Index

HADS: Hospital Anxiety and Depression Scale

VESSPA: Evaluation of the Subjective Effects of Substances with Abuse Potential Anxiety subscale

PAPA: Preschool Age Psychiatric Assessment

ECI-4: Early Childhood Inventory-4  
 TSCC: Trauma Symptom Checklist for Children  
 BAI: Beck Anxiety Inventory  
 PHQ: Patient Health Questionnaire  
 MASC: Multidimensional Anxiety Scale for Children  
 USA: United States of America

## References:

- Beste, C., Konrad, C., Uhlmann, C., Arolt, V., Zwanzger, P., & Domschke, K. (2013). Neuropeptide S receptor (NPSR1) gene variation modulates response inhibition and error monitoring. *NeuroImage*, *71*, 1–9. <https://doi.org/10.1016/j.neuroimage.2013.01.004>
- Chang, C. C., Chang, H. A., Fang, W. H., Chang, T. C., & Huang, S. Y. (2017). Gender-specific association between serotonin transporter polymorphisms (5-HTTLPR and rs25531) and neuroticism, anxiety and depression in well-defined healthy Han Chinese. *Journal of Affective Disorders*, *207*, 422–428. <https://doi.org/10.1016/j.jad.2016.08.055>
- Comasco, E., Gustafsson, P. A., Sydsjö, G., Agnafors, S., Aho, N., & Svedin, C. G. (2015). Psychiatric symptoms in adolescents: FKBP5 genotype–early life adversity interaction effects. *European Child & Adolescent Psychiatry*, *24*(12), 1473–83. <https://doi.org/10.1007/s00787-015-0768-3>
- Fernández-De-Las-Peñas, C., Ambite-Quesada, S., Gil-Crujera, A., Cigarán-Méndez, M., & Peñacoba-Puente, C. (2012). Catechol-O-methyltransferase Val158Met polymorphism influences anxiety, depression, and disability, but not pressure pain sensitivity, in women with fibromyalgia syndrome. *Journal of Pain*, *13*(11), 1068–1074. <https://doi.org/10.1016/j.jpain.2012.08.001>
- Guhn, A., Domschke, K., Müller, L. D., Dresler, T., Eff, F., Kopf, J., ... Herrmann, M. J. (2015). Neuropeptide S receptor gene variation and neural correlates of cognitive emotion regulation. *Social Cognitive and Affective Neuroscience*, *10*(12), 1730–7. <https://doi.org/10.1093/scan/nsv061>
- Hemmings, S. M. J., Martin, L. I., van der Merwe, L., Benecke, R., Domschke, K., & Seedat, S. (2016). Serotonin transporter variants play a role in anxiety sensitivity in South African adolescents. *The World Journal of Biological Psychiatry: The Official Journal of the World Federation of Societies of Biological Psychiatry*, *17*(1), 66–75. <https://doi.org/10.3109/15622975.2015.1102324>
- Konishi, Y., Tanii, H., Otowa, T., Sasaki, T., Tochigi, M., Umekage, T., ... Okada, M. (2014). Gene×gene×gender interaction of BDNF and COMT genotypes associated with panic disorder. *Progress in Neuro-Psychopharmacology and Biological Psychiatry*, *51*, 119–125. <https://doi.org/10.1016/j.pnpbp.2014.01.020>
- Kovacs-Nagy, R., Elek, Z., Szekely, A., Nanasi, T., Sasvari-Szekely, M., & Ronai, Z. (2013). Association of aggression with a novel microRNA binding site polymorphism in the wolfram gene. *American Journal of Medical Genetics, Part B: Neuropsychiatric Genetics*, *162*(4), 404–412. <https://doi.org/10.1002/ajmg.b.32157>
- Laas, K., Reif, A., Akkermann, K., Kiive, E., Domschke, K., Lesch, K.-P., ... Harro, J. (2014). Interaction of the neuropeptide S receptor gene Asn<sup>107</sup>Ile variant and environment: contribution to affective and anxiety disorders, and suicidal behaviour. *The International Journal of Neuropsychopharmacology / Official Scientific Journal of the Collegium Internationale Neuropsychopharmacologicum (CINP)*, *17*(4), 541–552. <https://doi.org/10.1017/S1461145713001478>
- Marusak, H. A., Kuruvadi, N., Vila, A. M., Shattuck, D. W., Joshi, S. H., Joshi, A. A., ... Thomason, M. E. (2016). Interactive effects of BDNF Val66Met genotype and trauma on limbic brain anatomy in childhood. *European Child and Adolescent Psychiatry*, *25*(5), 509–518. <https://doi.org/10.1007/s00787-015-0759-4>
- Miaskowski, C., Elboim, C., Paul, S. M., Mastick, J., Cooper, B. A., Levine, J. D., & Aouizerat, B. E. (2016). Polymorphisms in Tumor Necrosis Factor-alpha Are Associated With Higher Anxiety Levels in Women After Breast Cancer Surgery. *Clin Breast Cancer*, *16*(1), 63–71 e3. <https://doi.org/10.1016/j.clbc.2014.12.001>
- Mutschler, I., Wieckhorst, B., Meyer, A. H., Schweizer, T., Klarhöfer, M., Wilhelm, F. H., ... Ball, T. (2014). Who gets afraid in the MRI-scanner? Neurogenetics of state-anxiety changes during an fMRI experiment. *Neuroscience Letters*, *583*, 81–6. <https://doi.org/10.1016/j.neulet.2014.09.021>
- Nees, F., Witt, S. H., Lourdasamy, A., Vollstädt-Klein, S., Steiner, S., Poustka, L., ... Flor, H. (2013). Genetic Risk For Nicotine Dependence in the Cholinergic System and Activation of the Brain Reward System in Healthy Adolescents. *Neuropsychopharmacology: Official Publication of the American College of Neuropsychopharmacology*, *38*(May), 1–9. <https://doi.org/10.1038/npp.2013.131>
- Pardo-Lozano, R., Farré, M., Yubero-Lahoz, S., O'Mathúna, B., Torrens, M., Mustata, C., ... de la Torre, R. (2012). Clinical Pharmacology of 3,4-Methylenedioxymethamphetamine (MDMA, “Ecstasy”): The Influence of Gender and Genetics (CYP2D6, COMT, 5-HTT). *PLoS ONE*, *7*(10), e47599. <https://doi.org/10.1371/journal.pone.0047599>
- Park, M.-H., Sanders, E., Howe, M., Singh, M., Hallmayer, J., Kim, E., & Chang, K. (2015). Association of Anxiety Symptoms in Offspring of Bipolar Parents with Serotonin Transporter-Linked Polymorphic Region (5-HTTLPR) Genotype. *Journal of Child and Adolescent Psychopharmacology*, *25*(6), 458–466. <https://doi.org/10.1089/cap.2014.0115>
- Pasparakis, E., Koiliari, E., Zouraraki, C., Tsapakis, E. M., Roussos, P., Giakoumaki, S. G., & Bitsios, P. (2015). The effects of the CACNA1C rs1006737 A/G on affective startle modulation in healthy males. *European Psychiatry*, *30*(4), 492–498. <https://doi.org/10.1016/j.eurpsy.2015.03.004>
- Quast, C., Reif, A., Bruckl, T., Pfister, H., Weber, H., Mattheisen, M., ... Erhardt, A. (2014). Gender-specific association of variants in the akr1c1 gene with dimensional anxiety in patients with panic disorder: Additional evidence for the importance of neurosteroids in anxiety? *Depression and Anxiety*, *31*(10), 843–850. <https://doi.org/10.1002/da.22229>
- Sasaki, A., Sato, N., Suzuki, N., Kano, M., Tanaka, Y., Kanazawa, M., ... Fukudo, S. (2016). Associations between single-nucleotide polymorphisms in corticotropin-releasing hormone-related genes and Irritable bowel syndrome. *PLoS ONE*, *11*(2), e0149322. <https://doi.org/10.1371/journal.pone.0149322>
- Sheikh, H. I., Kryski, K. R., Smith, H. J., Dougherty, L. R., Klein, D. N., Bufferd, S. J., ... Hayden, E. P. (2013). Catechol-O-methyltransferase gene val158met polymorphism and depressive symptoms during early childhood. *American Journal of Medical Genetics, Part B: Neuropsychiatric Genetics*, *162*(3), 245–252. <https://doi.org/10.1002/ajmg.b.32141>
- Svetel, M., Pekmezovic, T., Markovic, V., Novaković, I., Dobričić, V., Djuric, G., ... Kostić, V. (2013). No association between brain-derived neurotrophic factor g196a polymorphism and clinical features of parkinson's disease. *European Neurology*, *70*(5–6), 257–262. <https://doi.org/10.1159/000352033>
- Tupak, S. V., Reif, A., Pauli, P., Dresler, T., Herrmann, M. J., Domschke, K., ... Ehlis, A.-C. (2013). Neuropeptide S receptor gene: fear-specific modulations of prefrontal activation. *NeuroImage*, *66*, 353–60. <https://doi.org/10.1016/j.neuroimage.2012.10.033>
- Udina, M., Moreno-España, J., Navinés, R., Giménez, D., Langohr, K., Gratacòs, M., ... Martín-Santos, R. (2013). Serotonin and interleukin-6: The role of genetic polymorphisms in IFN-induced neuropsychiatric symptoms. *Psychoneuroendocrinology*, *38*(9), 1803–1813. <https://doi.org/10.1016/j.psyneuen.2013.03.007>
- Wilhelm, K., Gillis, I., Reddy, J., Mitchell, P. B., Campbell, L., Dobson-Stone, C., ... Schofield, P. R. (2012). Association between serotonin transporter promoter polymorphisms and psychological distress in a diabetic population. *Psychiatry Research*, *200*(2–3), 343–348. <https://doi.org/10.1016/j.psychres.2012.07.008>

## Supplemental Figure 2. Cognitive Symptoms Search Results

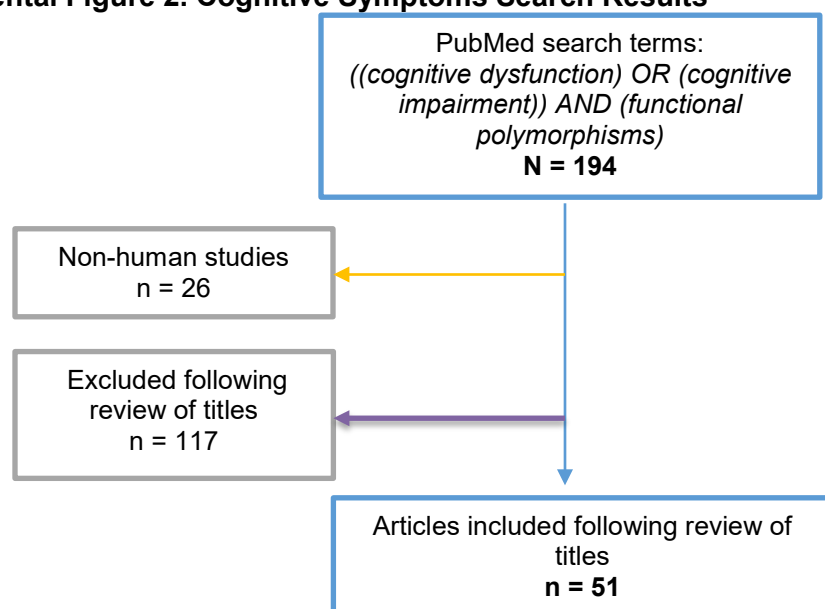

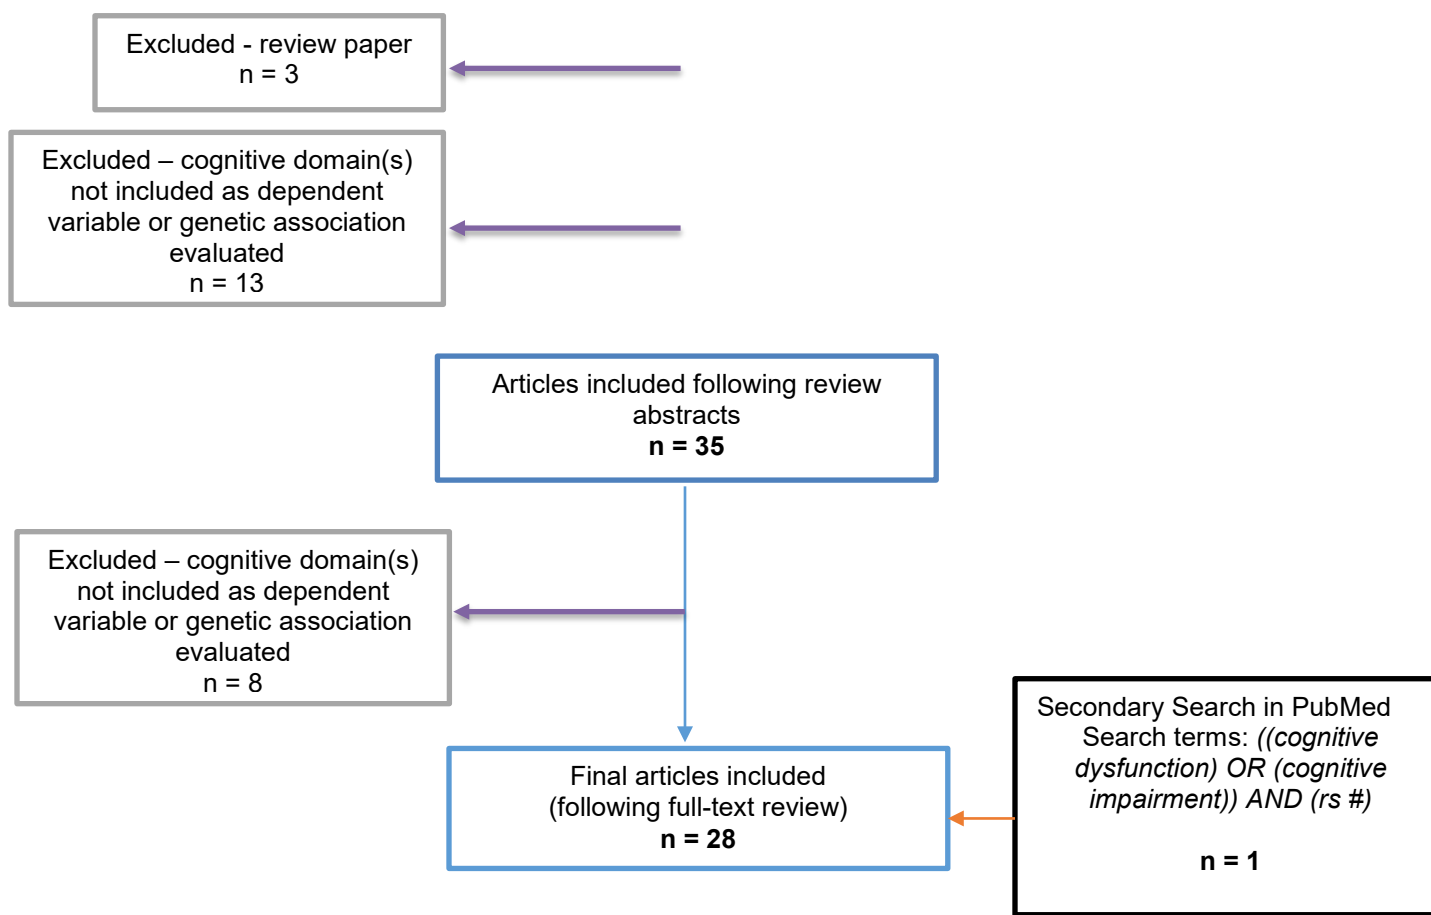

**Notes:** The initial search was conducted using the above mentioned key words. The following MESH terms were included in this search: ("cognitive dysfunction"[MeSH Terms] OR ("cognitive"[All Fields] AND "dysfunction"[All Fields]) OR "cognitive dysfunction"[All Fields] OR ("cognitive"[All Fields] AND "disturbance"[All Fields]) OR "cognitive disturbance"[All Fields]) AND (functional[All Fields] AND ("polymorphism, genetic"[MeSH Terms] OR ("polymorphism"[All Fields] AND "genetic"[All Fields]) OR "genetic polymorphism"[All Fields] OR "polymorphisms"[All Fields]))



**Supplementary Table 2. Evidence of Associations between Cognitive Symptoms and Genetic Polymorphisms**

| Author, Year, Country           | Gene                           | Polymorphism               | Cognitive Symptom Phenotype(s)                                                                                                                                                                                              | Context (i.e., sample details)                                                                                                                                                                                                                                                                                  | Relevant Findings                                                                                                                                                                                                                                                                                                                                                                                           |
|---------------------------------|--------------------------------|----------------------------|-----------------------------------------------------------------------------------------------------------------------------------------------------------------------------------------------------------------------------|-----------------------------------------------------------------------------------------------------------------------------------------------------------------------------------------------------------------------------------------------------------------------------------------------------------------|-------------------------------------------------------------------------------------------------------------------------------------------------------------------------------------------------------------------------------------------------------------------------------------------------------------------------------------------------------------------------------------------------------------|
| Aas et al., 2012, Norway        | <i>SLC6A4</i>                  | 5-HTTLPR                   | Cognitive function: <ul style="list-style-type: none"> <li>• Memory</li> <li>• Working memory &amp; executive function</li> <li>• Perception &amp; visuospatial abilities</li> <li>• Verbal abilities</li> </ul>            | Adult patients ( $n = 118$ ) with psychotic disorders recruited from hospital-based psychiatric units in Oslo, Norway; 46% female.<br><br>$n = 50$ subjects with schizophrenia spectrum disorders<br>$n = 53$ subjects with psychotic affective disorders<br>$n = 15$ with other psychoses                      | 5-HTTLPR variations was associated with cognitive dysfunction; l-carriers performed better than s-carriers in memory tests ( $p = 0.008$ )<br><br>Significant interaction effect: homozygotic s-carriers exposed to high levels of childhood trauma (physical neglect and abuse) had significantly poorer cognitive functioning than all other groups.                                                      |
| Azeredo et al., 2017, Brazil    | <i>BDNF</i>                    | rs6265 (Val66Met)          | Memory performance <ul style="list-style-type: none"> <li>• Immediate verbal recall</li> <li>• Delayed verbal recall</li> <li>• Memory retention rate</li> </ul>                                                            | $N = 87$ subjects who were > 55 years old were recruited using a community-based convenience sampling strategy in Porto Alegre, Brazil.<br>Val/Val group: 78.7% female; mean age $68.6 \pm 7.6$ years<br>Met allele carriers: 69.2% female; mean age $71.6 \pm 8.5$ years                                       | Met allele carriers had lower delayed verbal recall scores ( $p = 0.004$ ) and a decline in memory retention ( $p = 0.017$ ) when compared to Val/Val homozygotes.<br><br>No significant differences in immediate verbal recall between the two groups ( $p = 0.088$ ).                                                                                                                                     |
| Barratt et al., 2015, Australia | <i>MYD88</i>                   | rs6853                     | Cognitive dysfunction                                                                                                                                                                                                       | $N = 468$ patients receiving transdermal fentanyl for cancer pain were recruited from the European Pharmacogenetic Opioid Study (EPOS); 53% female; mean age $64 \pm 12$ years.                                                                                                                                 | Carriers of the MYD88 rs6853 variant were half as likely to have cognitive dysfunction (11/111 [10%]) than MYD88 rs6853 wild-type patients (21%) were twice as likely to have cognitive dysfunction than carriers of the variant (10%), with a relative risk of 0.45 (95% CI: 0.27 to 0.76) when accounting for major non-genetic predictors (age, Karnofsky functional score).                             |
| Bearden et al., 2004, USA       | <i>COMT</i>                    | rs4680 (Val158Met)         | Cognitive function: <ul style="list-style-type: none"> <li>• General intellectual function</li> <li>• Memory</li> <li>• Language</li> <li>• Attention</li> <li>• Executive function</li> <li>• Visuomotor skills</li> </ul> | $N = 44$ patients with confirmed 22q11.2 deletions ( $N = 44$ ) were recruited through the Clinical Genetics Center at the Children's Hospital of Philadelphia; 61% female; mean age $11.1 \pm 3.2$ years; 95% Caucasian.                                                                                       | Met-hemizygous patients performed better than Val-hemizygous patients for executive function after controlling for IQ ( $F=5.03$ , $df=1, 41$ , $p<0.05$ ).<br><br>Met allele was associated with significantly better performance on the digit span task after controlling for IQ ( $F=4.38$ , $df=1, 41$ , $p<0.05$ ) and superior performance on the Trails B test ( $F=3.57$ , $df=1, 41$ , $p=0.07$ ). |
| Bialecka et al., 2014, Poland   | <i>BDNF</i>                    | rs6265                     | Cognitive impairment                                                                                                                                                                                                        | $n = 244$ Parkinson disease (PD) patients were recruited in Outpatient Movement Disorder Clinics at two Polish centers; 51% female; mean age $64.2 \pm 9.4$ years.<br><br>$n = 242$ randomly select healthy individuals were recruited from same geographical regions; 53% female; mean age $65 \pm 9.4$ years. | rs6265 was not associated with cognitive status in PD patients and healthy controls..<br><br>PD patients with Met/Met alleles had better delayed recall of information than those with Val/Val alleles after controlling for age, disease duration, and years of education ( $p=0.038$ ).                                                                                                                   |
| Bosia et al., 2011, Italy       | <i>HTR1A</i>                   | rs6295                     | Cognitive performance: <ul style="list-style-type: none"> <li>• Intellectual functioning (Theory of Mind performance/abilities)</li> </ul>                                                                                  | $N = 118$ clinically stable patients with schizophrenia were recruited from outpatient clinics; 36% female                                                                                                                                                                                                      | Cognitive performance was predicted by rs6295 genotype ( $F = 5.03$ , $df = 2$ , $p = 0.008$ ), IQ ( $F = 16.8$ , $df = 1$ , $p = 0.000$ ) and executive function (i.e., planning) ( $F = 4.80$ , $df = 1$ , $p = 0.030$ ).                                                                                                                                                                                 |
| Braida et al., 2015, Italy      | <i>SNAP-25</i>                 | rs363050                   | Cognitive deficits                                                                                                                                                                                                          | $N = 44$ Italian children with Autism Spectrum Disorder; 9% female; mean age $10.9 \pm 4.7$ years.                                                                                                                                                                                                              | rs363050 associated with lower cognitive scores ( $p = 0.005$ ).<br>rs363050(GG) genotype was more frequent in subjects with lower cognitive scores than in subjects with higher cognitive scores (0.75 vs 0.25, $p = 0.005$ ).                                                                                                                                                                             |
| Chae et al., 2016, Singapore*   | <i>IL-6</i><br><br><i>TNFA</i> | rs1800795<br><br>rs1800629 | Cognitive function assessed using FACT-Cog and Headminder.                                                                                                                                                                  | $N = 125$ Asian early-stage breast cancer patients (Stage I to III) receiving chemotherapy were prospectively recruited from two cancer centers in Singapore; mean age 50.3 years; 80.8% Chinese                                                                                                                | No significant associations between polymorphisms and cognitive impairment.                                                                                                                                                                                                                                                                                                                                 |
| Dickinson et al., 2014, USA     | <i>SCN2A</i>                   | rs10174400                 | Cognitive ability: <ul style="list-style-type: none"> <li>• General cognitive ability</li> </ul>                                                                                                                            | GWAS discovery sample included 363 community                                                                                                                                                                                                                                                                    | Schizophrenia group: rs10174400 genotype was associated with the 6                                                                                                                                                                                                                                                                                                                                          |



|                                    |                     |                                                   |                                                                                                                                                                                                                                                                                                                                                                |                                                                                                                                                                                                                                                                                                                                                                                                                                                                                                                    |                                                                                                                                                                                                                                                                                                                                                                                                                                                                                                                                                                                                                                                                                                                                                                                                                                               |
|------------------------------------|---------------------|---------------------------------------------------|----------------------------------------------------------------------------------------------------------------------------------------------------------------------------------------------------------------------------------------------------------------------------------------------------------------------------------------------------------------|--------------------------------------------------------------------------------------------------------------------------------------------------------------------------------------------------------------------------------------------------------------------------------------------------------------------------------------------------------------------------------------------------------------------------------------------------------------------------------------------------------------------|-----------------------------------------------------------------------------------------------------------------------------------------------------------------------------------------------------------------------------------------------------------------------------------------------------------------------------------------------------------------------------------------------------------------------------------------------------------------------------------------------------------------------------------------------------------------------------------------------------------------------------------------------------------------------------------------------------------------------------------------------------------------------------------------------------------------------------------------------|
|                                    |                     |                                                   | <ul style="list-style-type: none"> <li>• Verbal memory</li> <li>• Visual memory</li> <li>• N-back</li> <li>• Processing speed</li> <li>• Card sorting</li> <li>• Working memory span</li> </ul>                                                                                                                                                                | <p>control individuals (52.6% female; mean age 31.2 years) and 339 people with DSM-IV schizophrenia (22.7% female; mean age 34.9 years).</p> <p>Follow-up analyses studied 147 unaffected siblings of the schizophrenia cases and independent schizophrenia samples including a total of an additional 668 participants.</p>                                                                                                                                                                                       | <p>cognitive domains (i.e., general cognitive abilities, span, card sorting, processing speed, verbal and visual memory, N-back)(all <math>p</math>'s <math>\leq 0.02</math>).</p> <p>Control group: Allelic trend for the control association with g was in the direction opposite the schizophrenia association, and an analysis of the interaction of rs10174400 genotype by group was also GWAS significance (<math>p = 1.75 \times 10^{-9}</math>).</p> <p>Follow-up analyses: In unaffected siblings, rs10174400 genotype was associated with and general cognitive abilities (<math>p = 0.03</math>). In 147 unaffected siblings, rs10174400 genotype was associated with years of education completed (<math>p = .003</math>), with T-allele carriers exhibiting reduced educational attainment compared to C-allele homozygotes.</p> |
| Gajewski et al., 2013, Germany     | TNFA                | rs1800629 (-308 A/G)                              | <p>Cognitive status:</p> <ul style="list-style-type: none"> <li>• Visual attention &amp; vigilance (Digit-Symbol Test)</li> </ul> <p>(Refer to manuscript for additional cognitive domains assessed, but had no significant genetic associations)</p>                                                                                                          | <p>N = 131 older healthy volunteers; 61.8% female; mean age <math>70.5 \pm 4.5</math> years.</p>                                                                                                                                                                                                                                                                                                                                                                                                                   | <p>rs1800629 associated with digit-symbol test; total number of written symbols was higher in the GG than in the GA-AA subgroup (45.9 vs. 40.7; <math>F(1,129) = 6.8</math>; <math>p &lt; 0.01</math>) and for the mean number of correctly written symbols (45.9 vs. 40.6; <math>F(1,129) = 7.1</math>; <math>p &lt; 0.01</math>).</p>                                                                                                                                                                                                                                                                                                                                                                                                                                                                                                       |
| Gozal et al., 2012, USA            | NOX                 | rs4673                                            | <p>Cognitive function deficits:</p> <ul style="list-style-type: none"> <li>• Differential Ability Scales (DAS)</li> <li>• NeuroPsychological Assessment Battery (NEPSY)</li> </ul> <p>Subjects were considered to have cognitive deficits if they scored 1 standard deviation below the mean for at least three subtests on either DAS or NEPSY batteries.</p> | <p>Children with Obstructive Sleep Apnea (OSA) were matched for age, gender, ethnicity, body mass index (BMI), the severity of sleep apnea, and maternal education.</p> <p>N = 69 children with OSA who exhibited altered neurocognitive Performances; 48% female; mean age <math>6.6 \pm 0.5</math> years; 30% African American.</p> <p>n = 47 matched children with OSA who did not have any evidence of neurocognitive deficits; 49% female; mean age <math>6.7 \pm 0.6</math> years; 30% African American.</p> | <p>rs4673 significantly different between 2 OSA subgroups (altered neurocognitive performances vs. those with no evidence of neurocognitive deficits) (<math>p &lt; 0.01</math>). The frequency of rs4673 polymorphism was significantly less frequent among the children with cognitive deficits (<math>p &lt; 0.02</math>).</p>                                                                                                                                                                                                                                                                                                                                                                                                                                                                                                             |
| Hoogland et al., 2010, Netherlands | COMT                | rs4680 (Val158Met)                                | <p>Cognitive performance:</p> <ul style="list-style-type: none"> <li>• Attention</li> <li>• Executive function</li> </ul>                                                                                                                                                                                                                                      | <p>N = 153 early Parkinson Disease patients from outpatient clinics general hospitals in the Netherlands.</p>                                                                                                                                                                                                                                                                                                                                                                                                      | <p>No association between COMT val158met genotype and cognitive performance.</p>                                                                                                                                                                                                                                                                                                                                                                                                                                                                                                                                                                                                                                                                                                                                                              |
| Kobayashi et al., 2012, Japan      | NT-3                | rs6332                                            | <p>Cognitive function via the frontal assessment battery (FAB):</p> <ul style="list-style-type: none"> <li>• FAB total score</li> <li>• Similarities</li> <li>• Lexical fluency</li> <li>• Motor series</li> <li>• Conflicting instructions</li> <li>• Go/no-go</li> <li>• Prehension behavior</li> </ul>                                                      | <p>N = 215 Japanese outpatients with dementia (n = 168) and mild cognitive impairment (MCI) (n = 47) were recruited from memory outpatient clinics at Jikei University Hospital (Tokyo) or the Jikei University Kashiwa Hospital (Kashiwa City).</p>                                                                                                                                                                                                                                                               | <p>rs6332 genotype associated with conflicting instructions score among the 6 subtests (<math>p &lt; 0.05</math>). In patients with mild AD, the conflicting instructions score differed significantly among the three genotypic groups of rs6332 (<math>p &lt; 0.05</math>) (G/G &lt; A/A: <math>p = 0.042</math> and G/A &lt; A/A: <math>p = 0.041</math>).</p>                                                                                                                                                                                                                                                                                                                                                                                                                                                                             |
| Levine et al., 2012, USA           | BDNF<br>COMT<br>DAT | rs6265 (Val66Met)<br>rs4680 (Val158Met)<br>3 VNTR | <ul style="list-style-type: none"> <li>• Working memory</li> <li>• Processing speed</li> <li>• Learning</li> <li>• Memory</li> <li>• Motor</li> </ul>                                                                                                                                                                                                          | <p>N = 184 HIV+ adults; 13.5% female; mean age <math>44.2 \pm 8.5</math> years; 77.7% Caucasian.</p>                                                                                                                                                                                                                                                                                                                                                                                                               | <p>No significant effects of polymorphisms or HIV disease severity on neurocognitive functioning.</p>                                                                                                                                                                                                                                                                                                                                                                                                                                                                                                                                                                                                                                                                                                                                         |
| Li et al., 2017, China             | SORL1               | rs1699102                                         | <p>Cognitive functions:</p> <ul style="list-style-type: none"> <li>• Mental status</li> <li>• Episodic memory</li> <li>• Attention &amp; processing</li> <li>• Visual-spatial language ability</li> <li>• Executive function</li> </ul>                                                                                                                        | <p>N = 780 native Chinese, non-demented adults (&gt; 50 years) in the Beijing Aging Brain Rejuvenation Initiative database; 63% female.</p>                                                                                                                                                                                                                                                                                                                                                                        | <p>T allele associated with accelerated age-related change in episodic memory and processing speed tests (after controlling for group x age interaction; all <math>p</math>'s &lt; 0.03).</p>                                                                                                                                                                                                                                                                                                                                                                                                                                                                                                                                                                                                                                                 |
| Ma et al., 2016, China             | APOE                | rs405509                                          | <p>Cognitive performances:</p> <ul style="list-style-type: none"> <li>• General mental status</li> <li>• Memory</li> <li>• Attention</li> </ul>                                                                                                                                                                                                                | <p>N = 100 Chinese participants with fMRI imaging data who are in the Beijing Aging Brain Rejuvenation Initiative; age between 55 and 85 years; 59% female</p>                                                                                                                                                                                                                                                                                                                                                     | <p>Significant interaction between rs405509 and APOE status on general mental status, memory and attention (<math>p &lt; 0.05</math>).</p>                                                                                                                                                                                                                                                                                                                                                                                                                                                                                                                                                                                                                                                                                                    |

|                                     |        |                                                    |                                                                                                                                                                                                                                                                                                                                                                                                            |                                                                                                                                                                                                                                                   |                                                                                                                                                                                                                                                                                                                                                                                                                                                                                                               |
|-------------------------------------|--------|----------------------------------------------------|------------------------------------------------------------------------------------------------------------------------------------------------------------------------------------------------------------------------------------------------------------------------------------------------------------------------------------------------------------------------------------------------------------|---------------------------------------------------------------------------------------------------------------------------------------------------------------------------------------------------------------------------------------------------|---------------------------------------------------------------------------------------------------------------------------------------------------------------------------------------------------------------------------------------------------------------------------------------------------------------------------------------------------------------------------------------------------------------------------------------------------------------------------------------------------------------|
| Matsuzaka et al., 2017, Brazil      | COMT   | rs4680<br>rs165599<br>rs737865                     | Working memory:<br><ul style="list-style-type: none"> <li>• Visual Working Memory (VWM) Task</li> <li>• Keep Track Task</li> <li>• Letter Memory Task</li> </ul>                                                                                                                                                                                                                                           | $n = 212$ individuals with schizophrenia; 31% female; 59% Caucasian<br><br>$n = 257$ healthy controls (HCs) from 3 locations in Brazil; 61% female; 67% Caucasian                                                                                 | Significant association between rs4680 and rs737865 and Keep Track Task. (post-hoc Bonferroni $p$ 's = 0.042 and 0.043, respectively).<br>rs165599 genotype*group interaction effect associated with VWM and Keep Track task performance in patients and controls, with AA carriers scoring lowest on both tests among controls, but highest among patients.                                                                                                                                                  |
| Myrum et al., 2015, Norway          | ARC    | GWAS study, refer to manuscript for list of SNPs   | Cognitive function:<br><ul style="list-style-type: none"> <li>• Semantic knowledge</li> <li>• Visuospatial ability</li> <li>• Estimated IQ</li> <li>• Episodic memory</li> <li>• Delayed episodic memory</li> <li>• Processing speed</li> </ul>                                                                                                                                                            | $N = 670$ healthy subjects in the Norwegian Cognitive NeuroGenetics (NCNG) database                                                                                                                                                               | No significant associations with cognitive abilities.                                                                                                                                                                                                                                                                                                                                                                                                                                                         |
| Nagata et al., 2011a, Japan         | NGF    | rs6330                                             | Cognitive function (executive function) via the frontal assessment battery (FAB):<br><ul style="list-style-type: none"> <li>• FAB total score</li> <li>• Similarities</li> <li>• Lexical fluency</li> <li>• Motor series</li> <li>• Conflicting instructions</li> <li>• Go/no-go</li> <li>• Prehension behavior</li> </ul>                                                                                 | $N = 200$ Japanese outpatients with dementia ( $n = 158$ ) and mild cognitive impairment ( $n = 42$ ) were recruited from memory outpatient clinics at Jikei University Hospital (Tokyo) or the Jikei University Kashiwa Hospital (Kashiwa City). | Significant differences identified for the go/no-go scores in between C/C and T carriers ( $p < 0.01$ ). No significant differences in the other neuropsychological subtest scores reflecting attentional and memory function.                                                                                                                                                                                                                                                                                |
| Nagata et al., 2011b, Japan         | BDNF   | rs2030324 (C270T)<br><br>rs6265 (Val66Met [G196A]) | Cognitive function (executive function) via the frontal assessment battery (FAB):<br><ul style="list-style-type: none"> <li>• FAB total score</li> <li>• Similarities</li> <li>• Lexical fluency</li> <li>• Motor series</li> <li>• Conflicting instructions</li> <li>• Go/no-go</li> <li>• Prehension behavior</li> </ul>                                                                                 | $N = 169$ elderly Japanese outpatients with dementia or amnesic mild cognitive impairment; 67% female.                                                                                                                                            | FAB scores were significantly different between the rs2030324 genotypes (C/C and C/T) ( $p = 0.003$ ). Subtest scores, conflicting instructions ( $p = 0.001$ ) and prehension behavior ( $p = 0.008$ ), significantly differed between rs2030324 genotypes.<br><br>No significant associations between rs6265 genotypes and FAB scores.                                                                                                                                                                      |
| Nagata et al., 2012, Japan          | BDNF   | rs6265 (Val66Met)                                  | Cognitive function (executive function) via the frontal assessment battery (FAB):<br><ul style="list-style-type: none"> <li>• FAB total score</li> <li>• Similarities</li> <li>• Lexical fluency</li> <li>• Motor series</li> <li>• Conflicting instructions</li> <li>• Go/no-go</li> <li>• Prehension behavior</li> </ul>                                                                                 | $N = 146$ Japanese outpatients with dementia or amnesic mild cognitive impairment.                                                                                                                                                                | Patients with only a mild stage of AD: FAB total and go/no-go scores were significantly lower in those with Val/Val genotype than the Met carriers ( $p < 0.05$ ).                                                                                                                                                                                                                                                                                                                                            |
| Nedić et al., 2011, Croatia         | COMT   | rs4680 (Val158Met)                                 | Cognitive function:<br><ul style="list-style-type: none"> <li>• Cognitive status (Mini mental state examination [MMSE])</li> <li>• Cognitive impairment (Alzheimer's disease assessment scale-Cog [ADAS-Cog])</li> <li>• Visual attention (Visual association test [VAT])</li> <li>• Verbal &amp; visual memory (Word pairs learning and recall/picture pairs learning and recall [WPLCR/PPLR])</li> </ul> | $n = 46$ patients with dementia (52% female) and $n = 65$ healthy older subjects (48% female). All patients were medication free, Caucasian, and of Croatian origin.                                                                              | When compared to Met/Val or Val/Val genotypes, carriers of Met/Met genotype scored significantly lower on MMSE ( $p = 0.043$ ), significantly longer time to respond to VAT duration of numbers test ( $p = 0.030$ ), VAT time of response to numbers test ( $p = 0.031$ ) and VAT average response to numbers test ( $p = 0.031$ ), and significantly greater number of unanswered questions to WPLCR/PPLR ( $p = 0.026$ ).                                                                                  |
| Ng et al., 2016, Singapore          | BDNF   | rs6265                                             | Cognitive impairment assessed using Functional Assessment of Cancer Therapy-Cognitive Function                                                                                                                                                                                                                                                                                                             | $N = 145$ patients receiving chemotherapy for early-stage breast cancer (mean age: 50.8±8.8 years; 82.1% Chinese)                                                                                                                                 | Met/Met genotype was significantly associated with lower odds of developing cognitive impairment (odds ratio [OR] = 0.26; 95% CI: 0.08–0.92; $p = .036$ ). Met carriers were less likely to experience impairment in the domains of verbal fluency (OR = 0.34; 95% CI: 0.12–0.90; $p = .031$ ) and multitasking ability (OR = 0.37; 95% CI: 0.15–0.91; $p = .030$ ) compared with the Val/Val homozygote.                                                                                                     |
| Oroszi et al., 2006, USA            | BDNF   | rs6265 (Val66Met)                                  | Cognitive dysfunction (domains):<br><ul style="list-style-type: none"> <li>• Memory</li> <li>• Attention/executive function</li> <li>• Visuospatial skills</li> <li>• Motor function</li> <li>• Psychomotor speed</li> </ul>                                                                                                                                                                               | $N = 59$ patients with systemic lupus erythematosus (SLE) with no previous or current central nervous system involvement; 78% female; mean age 41 ± 13 years; 53% Caucasian.                                                                      | Met66 allele significantly associated with higher on psychomotor, attention/executive and motor function scores, and significantly higher domain Z scores for the psychomotor ( $p = 0.005$ ) and motor ( $p = 0.002$ ) domains.                                                                                                                                                                                                                                                                              |
| Payton et al., 2005, United Kingdom | SLC6A4 | 16 or 17 bp VNTR2<br><br>HTTLPR                    | Cognitive decline:<br><ul style="list-style-type: none"> <li>• Fluid intelligence (Heim intelligence tests parts one and two [AH and AH2]).</li> <li>• Vocabulary ability (Raven Mill Hill vocabulary scale part A [MHA]).</li> <li>• Processing speed (Random Letters [RL] test).</li> <li>• Memory (semantic memory [SEM], Immediate verbal Recall [IR], Delayed verbal</li> </ul>                       | $N = 758$ elderly Caucasian volunteers (234 males and 524 females) involved in this study form part of the Dyne Steele DNA bank for cognitive genetic studies; 69% female; mean age 63 years.                                                     | Individuals homozygous for the VNTR2 12 alleles had a faster rate of cognitive decline for all cognitive tests compared to other genotypes; significance for both tests of fluid intelligence (AH1 $p = 0.002$ , AH2 $p = 0.014$ ), the test of SEM ( $p = 0.010$ ) and general cognitive ability ( $p = 0.006$ ). No associations were observed between the HTTLPR polymorphism and cognitive decline, except homozygous individuals scored significantly higher on the delayed recall test ( $p = 0.035$ ). |

|                                            |              |                                                                                                                             | Recall [DR] and Spatial Recall [SR]).                                                                                                                                                                                                                                                        |                                                                                                                                                                                                                                                                  |                                                                                                                                                                                                                                                                                                                                                                                                   |
|--------------------------------------------|--------------|-----------------------------------------------------------------------------------------------------------------------------|----------------------------------------------------------------------------------------------------------------------------------------------------------------------------------------------------------------------------------------------------------------------------------------------|------------------------------------------------------------------------------------------------------------------------------------------------------------------------------------------------------------------------------------------------------------------|---------------------------------------------------------------------------------------------------------------------------------------------------------------------------------------------------------------------------------------------------------------------------------------------------------------------------------------------------------------------------------------------------|
| Su et al., 2015, China                     | <i>BDNF</i>  | rs6265 (Val66Met)                                                                                                           | Cognitive functioning via Repeatable Battery for the Assessment of Neuropsychological Status [RBANS, Form A]: <ul style="list-style-type: none"> <li>• Immediate memory</li> <li>• Visuospatial/constructional</li> <li>• Language</li> <li>• Attention</li> <li>• Delayed memory</li> </ul> | <i>n</i> = 194 methamphetamine-dependent patients who were inpatients at Wenzhou Sanyang Detoxification Center; 18% female; mean age 31.5 ± 8.4 years.<br><br><i>n</i> = 378 healthy volunteers without history of drug use; 61% female; mean age 46 ± 13 years. | No significant associations between rs6265 genotypes and cognitive functioning (RBANS scores) after Bonferroni correction.<br>In methamphetamine-dependent patients, BDNF x genotype interaction statistically significant on total score ( <i>p</i> = 0.018), immediate memory index ( <i>p</i> = 0.014), and visuospatial constructional index ( <i>p</i> = 0.022).                             |
| Warburton et al., 2016, United Kingdom     | <i>BDNF</i>  | rs1491850<br>rs2030324<br>rs11030094<br>rs6265                                                                              | Cognitive dysfunction: <ul style="list-style-type: none"> <li>• Memory</li> <li>• Psychomotor speed</li> <li>• Information processing</li> </ul>                                                                                                                                             | <i>N</i> = 82 adults newly diagnosed with epilepsy who had neuropsychological assessment and DNA sample and were part of the larger SANAD trials. 55% female; mean age 40 years; 100% Caucasian.                                                                 | Significant association between genotype and memory function at both baseline ( <i>NRSF</i> : rs1105434, rs2227902 and <i>BDNF</i> : rs1491850, rs2030324, rs11030094) and in the longitudinal analysis ( <i>NRSF</i> : rs2227902 and <i>BDNF</i> : rs12273363 [all <i>p</i> 's < 0.05]). Psychomotor speed was associated with genotype ( <i>NRSF</i> rs3796529) in the longitudinal assessment. |
| Williams-Gray et al., 2008, United Kingdom | <i>COMT</i>  | rs4680 (Val158Met)                                                                                                          | Attentional control: <ul style="list-style-type: none"> <li>• Task/behavioral performance</li> </ul>                                                                                                                                                                                         | <i>N</i> = 29 medicated patients with early Parkinson disease; 38% female.                                                                                                                                                                                       | Patients with val/val genotype made fewer errors during intradimensional (ID) shifting problems than extradimensional (ED) problems; whereas those with met/met genotype performed equally for ID or ED shift.                                                                                                                                                                                    |
| <b>Symptom Cluster Study</b>               |              |                                                                                                                             |                                                                                                                                                                                                                                                                                              |                                                                                                                                                                                                                                                                  |                                                                                                                                                                                                                                                                                                                                                                                                   |
| Miaskowski et al., 2017                    | <i>CXCL8</i> | Haplotype: <ul style="list-style-type: none"> <li>• rs4073 (A)</li> <li>• rs2227306 (C)</li> <li>• rs2227543 (C)</li> </ul> | Mood-cognitive symptom cluster based on symptom severity (reported on MSAS) for: <ul style="list-style-type: none"> <li>• Difficult concentrating</li> <li>• Feeling sad</li> <li>• Worrying</li> <li>• Itching</li> <li>• Feeling irritable</li> </ul>                                      | Patients ( <i>n</i> = 157) with breast or prostate cancer at the completion of radiation therapy.                                                                                                                                                                | For each additional dose of the haplotype, the mood-cognitive symptom cluster score decreased by 39.0% ( <i>P</i> = 0.009).                                                                                                                                                                                                                                                                       |
|                                            | <i>NFKB2</i> | rs1056890                                                                                                                   |                                                                                                                                                                                                                                                                                              |                                                                                                                                                                                                                                                                  | Having two doses of the rare allele (i.e., CC+CT vs. TT) was associated with a 2.30-fold higher mood-cognitive symptom factor score ( <i>P</i> = 0.014).                                                                                                                                                                                                                                          |
|                                            | <i>IL-13</i> | rs20541                                                                                                                     |                                                                                                                                                                                                                                                                                              |                                                                                                                                                                                                                                                                  | As the dose of the rare allele increased (i.e., CC vs. CT vs. TT), the mood-cognitive symptom factor score decreased by 47% ( <i>P</i> = 0.014).                                                                                                                                                                                                                                                  |

\* added from secondary search

## References

- Aas, M., Djurovic, S., Athanasiu, L., Steen, N. E., Agartz, I., Lorentzen, S., . . . Melle, I. (2012). Serotonin transporter gene polymorphism, childhood trauma, and cognition in patients with psychotic disorders. *Schizophr Bull*, 38(1), 15-22. doi:10.1093/schbul/sbr113
- Azeredo, L. A., De Nardi, T., Levandowski, M. L., Tractenberg, S. G., Kommers-Molina, J., Wieck, A., . . . Grassi-Oliveira, R. (2017). The brain-derived neurotrophic factor (BDNF) gene Val66Met polymorphism affects memory performance in older adults. *Rev Bras Psiquiatr*, 39(2), 90-94. doi:10.1590/1516-4446-2016-1980
- Barratt, D. T., Klepstad, P., Dale, O., Kaasa, S., & Somogyi, A. A. (2015). Innate Immune Signalling Genetics of Pain, Cognitive Dysfunction and Sickness Symptoms in Cancer Pain Patients Treated with Transdermal Fentanyl. *PLoS One*, 10(9), e0137179. doi:10.1371/journal.pone.0137179
- Bearden, C. E., Jawad, A. F., Lynch, D. R., Sokol, S., Kanes, S. J., McDonald-McGinn, D. M., . . . Simon, T. J. (2004). Effects of a functional COMT polymorphism on prefrontal cognitive function in patients with 22q11.2 deletion syndrome. *Am J Psychiatry*, 161(9), 1700-1702. doi:10.1176/appi.ajp.161.9.1700
- Bialecka, M., Kurzawski, M., Roszmann, A., Robowski, P., Sitek, E. J., Honczarenko, K., . . . Slawek, J. (2014). BDNF G196A (Val66Met) polymorphism associated with cognitive impairment in Parkinson's disease. *Neurosci Lett*, 561, 86-90. doi:10.1016/j.neulet.2013.12.051
- Bosia, M., Anselmetti, S., Bechi, M., Lorenzi, C., Pirovano, A., Cocchi, F., . . . Cavallaro, R. (2011). Effect of 5-HT1A-receptor functional polymorphism on Theory of Mind performances in schizophrenia. *Psychiatry Res*, 188(2), 187-190. doi:10.1016/j.psychres.2010.11.014
- Braida, D., Guerini, F. R., Ponzoni, L., Corradini, I., De Astis, S., Pattini, L., . . . Sala, M. (2015). Association between SNAP-25 gene polymorphisms and cognition in autism: functional consequences and potential therapeutic strategies. *Transl Psychiatry*, 5, e500. doi:10.1038/tp.2014.136
- Chae, J. W., Ng, T., Yeo, H. L., Shwe, M., Gan, Y. X., Ho, H. K., & Chan, A. (2016). Impact of TNF-alpha (rs1800629) and IL-6 (rs1800795) Polymorphisms on Cognitive Impairment in Asian Breast Cancer Patients. *PLoS One*, 11(10), e0164204. doi:10.1371/journal.pone.0164204
- Dickinson, D., Straub, R. E., Trampush, J. W., Gao, Y., Feng, N., Xie, B., . . . Weinberger, D. R. (2014). Differential effects of common variants in SCN2A on general cognitive ability, brain physiology, and messenger RNA expression in schizophrenia cases and control individuals. *JAMA Psychiatry*, 71(6), 647-656. doi:10.1001/jamapsychiatry.2014.157
- Gajewski, P. D., Hengstler, J. G., Golka, K., Falkenstein, M., & Beste, C. (2013). The functional tumor necrosis factor-alpha (308A/G) polymorphism modulates attentional selection in elderly individuals. *Neurobiol Aging*, 34(11), 2694.e2691-2694.e2612. doi:10.1016/j.neurobiolaging.2013.04.017
- Gozal, D., Khalyfa, A., Capdevila, O. S., Kheirandish-Gozal, L., Khalyfa, A. A., & Kim, J. (2012). Cognitive function in prepubertal children with obstructive sleep apnea: a modifying role for NADPH oxidase p22 subunit gene polymorphisms? *Antioxid Redox Signal*, 16(2), 171-177. doi:10.1089/ars.2011.4189
- Hoogland, J., de Bie, R. M., Williams-Gray, C. H., Muslimovic, D., Schmand, B., & Post, B. (2010). Catechol-O-methyltransferase val158met and cognitive function in Parkinson's disease. *Mov Disord*, 25(15), 2550-2554. doi:10.1002/mds.23319
- Kobayashi, N., Nagata, T., Shinagawa, S., Nakayama, R., Kondo, K., Nakayama, K., & Yamada, H. (2012). Association between neurotrophin-3 polymorphisms and executive function in Japanese patients with amnesic mild cognitive impairment and mild Alzheimer disease. *Dement Geriatr Cogn Disord*, 34(3-4), 190-197. doi:10.1159/000343075

- Levine, A. J., Sinsheimer, J. S., Bilder, R., Shapshak, P., & Singer, E. J. (2012). Functional polymorphisms in dopamine-related genes: effect on neurocognitive functioning in HIV+ adults. *J Clin Exp Neuropsychol*, 34(1), 78-91. doi:10.1080/13803395.2011.623118
- Li, H., Lv, C., Yang, C., Wei, D., Chen, K., Li, S., & Zhang, Z. (2017). SORL1 rs1699102 polymorphism modulates age-related cognitive decline and gray matter volume reduction in non-demented individuals. *Eur J Neurol*, 24(1), 187-194. doi:10.1111/ene.13182
- Ma, C., Zhang, Y., Li, X., Chen, Y., Zhang, J., Liu, Z., . . . Zhang, Z. (2016). The TT allele of rs405509 synergizes with APOE epsilon4 in the impairment of cognition and its underlying default mode network in non-demented elderly. *Curr Alzheimer Res*, 13(6), 708-717.
- Matsuzaka, C. T., Christofolini, D., Ota, V. K., Gadelha, A., Berberian, A. A., Noto, C., . . . Bressan, R. A. (2017). Catechol-O-methyltransferase (COMT) polymorphisms modulate working memory in individuals with schizophrenia and healthy controls. *Rev Bras Psiquiatr*, 39(4), 302-308. doi:10.1590/1516-4446-2016-1987
- Myrum, C., Giddaluru, S., Jacobsen, K., Espeseth, T., Nyberg, L., Lundervold, A. J., . . . Bramham, C. R. (2015). Common variants in the ARC gene are not associated with cognitive abilities. *Brain Behav*, 5(10), e00376. doi:10.1002/brb3.376
- Nagata, T., Shinagawa, S., Nukariya, K., Nakayama, R., Nakayama, K., & Yamada, H. (2011). Association between nerve growth factor gene polymorphism and executive dysfunction in Japanese patients with early-stage Alzheimer's disease and amnesic mild cognitive impairment. *Dement Geriatr Cogn Disord*, 32(6), 379-386. doi:10.1159/000335355
- Nagata, T., Shinagawa, S., Nukariya, K., Ochiai, Y., Kawamura, S., Agawa-Ohta, M., . . . Yamada, H. (2011). Association between brain-derived neurotrophic factor (BDNF) gene polymorphisms and executive function in Japanese patients with Alzheimer's disease. *Psychogeriatrics*, 11(3), 141-149. doi:10.1111/j.1479-8301.2011.00364.x
- Nagata, T., Shinagawa, S., Nukariya, K., Yamada, H., & Nakayama, K. (2012). Association between BDNF polymorphism (Val66Met) and executive function in patients with amnesic mild cognitive impairment or mild Alzheimer disease. *Dement Geriatr Cogn Disord*, 33(4), 266-272. doi:10.1159/000339358
- Nedic, G., Borovecki, F., Klepac, N., Mubrin, Z., Hajnsek, S., Nikolac, M., . . . Pivac, N. (2011). Association study of a functional catechol-o-methyltransferase polymorphism and cognitive function in patients with dementia. *Coll Antropol*, 35 Suppl 1, 79-84.
- Ng, T., Teo, S. M., Yeo, H. L., Shwe, M., Gan, Y. X., Cheung, Y. T., . . . Chan, A. (2016). Brain-derived neurotrophic factor genetic polymorphism (rs6265) is protective against chemotherapy-associated cognitive impairment in patients with early-stage breast cancer. *Neuro Oncol*, 18(2), 244-251. doi:10.1093/neuonc/nov162
- Oroszi, G., Lapteva, L., Davis, E., Yarboro, C. H., Weickert, T., Roebuck-Spencer, T., . . . Illei, G. G. (2006). The Met66 allele of the functional Val66Met polymorphism in the brain-derived neurotrophic factor gene confers protection against neurocognitive dysfunction in systemic lupus erythematosus. *Ann Rheum Dis*, 65(10), 1330-1335. doi:10.1136/ard.2006.051623
- Payton, A., Gibbons, L., Davidson, Y., Ollier, W., Rabbitt, P., Worthington, J., . . . Horan, M. (2005). Influence of serotonin transporter gene polymorphisms on cognitive decline and cognitive abilities in a nondemented elderly population. *Mol Psychiatry*, 10(12), 1133-1139. doi:10.1038/sj.mp.4001733
- Su, H., Tao, J., Zhang, J., Xie, Y., Wang, Y., Zhang, Y., . . . He, J. (2015). The Effects of BDNF Val66Met Gene Polymorphism on Serum BDNF and Cognitive Function in Methamphetamine-Dependent Patients and Normal Controls: A Case-Control Study. *J Clin Psychopharmacol*, 35(5), 517-524. doi:10.1097/jcp.0000000000000390
- Warburton, A., Miyajima, F., Shazadi, K., Crossley, J., Johnson, M. R., Marson, A. G., . . . Sills, G. J. (2016). NRSF and BDNF polymorphisms as biomarkers of cognitive dysfunction in adults with newly diagnosed epilepsy. *Epilepsy Behav*, 54, 117-127. doi:10.1016/j.yebeh.2015.11.013
- Williams-Gray, C. H., Hampshire, A., Barker, R. A., & Owen, A. M. (2008). Attentional control in Parkinson's disease is dependent on COMT val 158 met genotype. *Brain*, 131(Pt 2), 397-408. doi:10.1093/brain/awm313

### Supplemental Figure 3. Depressive Symptoms Search Results

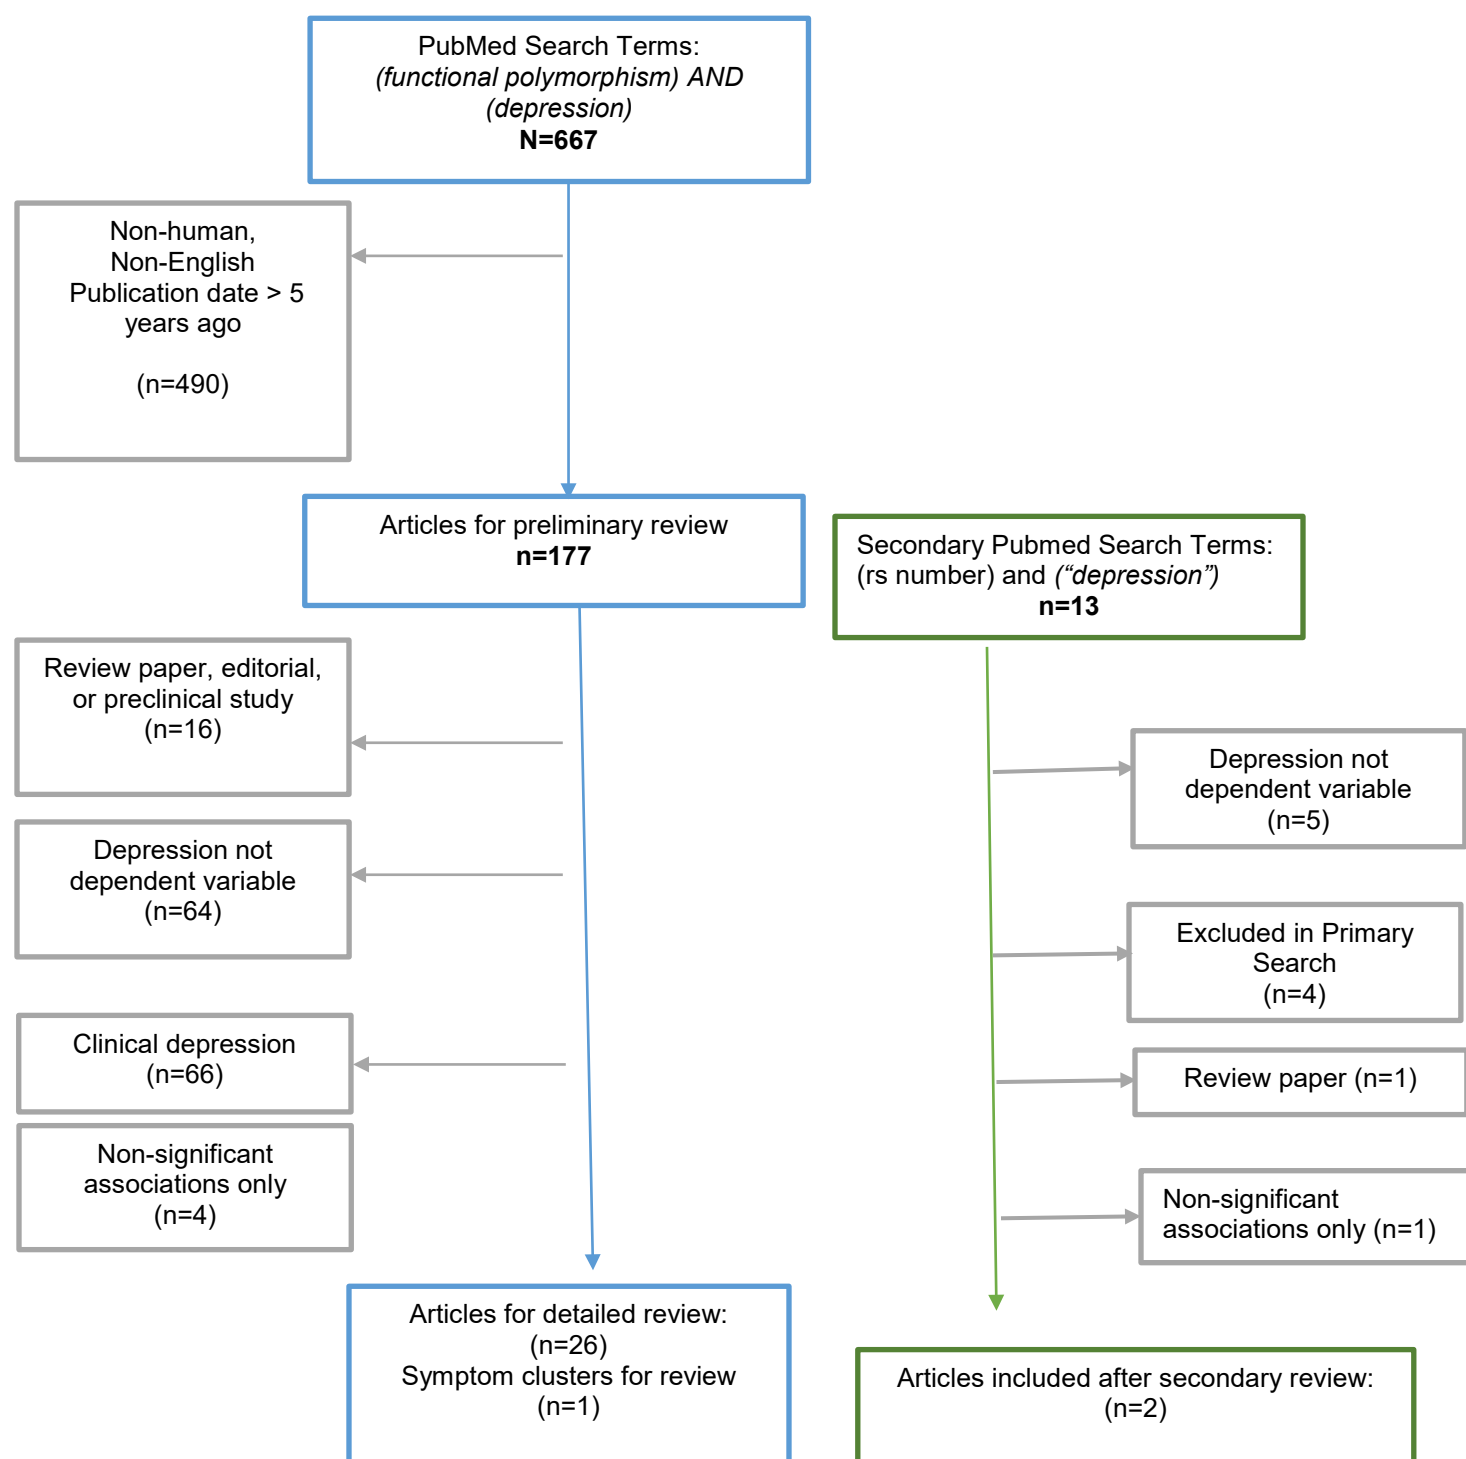



**Supplementary Table 3. Evidence of Associations between Symptoms of Depression and Genetic Polymorphisms**

| Author, Year, Country             | Gene  | Polymorphism | Depression Symptom Phenotype(s)                                      | Sample                                                                                                                                                       | Relevant Findings                                                                                                                                                                                                                                                                                                                                                                                                                                                                              |
|-----------------------------------|-------|--------------|----------------------------------------------------------------------|--------------------------------------------------------------------------------------------------------------------------------------------------------------|------------------------------------------------------------------------------------------------------------------------------------------------------------------------------------------------------------------------------------------------------------------------------------------------------------------------------------------------------------------------------------------------------------------------------------------------------------------------------------------------|
| Avery et al., 2016, USA           | HTR2C | rs6318       | Diagnostic Inventory for Depression (DID) score                      | - n=112 non-depressed young adults from private Midwest university; 35% female                                                                               | Significant main effect of genotype on subclinical depressive symptoms (F(1,110) = 6.463, p = 0.012). Carriers exhibited significantly higher levels of subclinical symptoms (M = 7.84, SD = 2.15) than non-carriers (M = 5.58, SD = 1.84).                                                                                                                                                                                                                                                    |
| Brummett et al., 2014, USA        | HTR2C | rs6318       | Center for Epidemiologic Studies Depression Scale (CES-D) Mean score | - n=5078 young adults from large population-based sample in USA<br>- 53% female; 100% Caucasian; mean age across genotype groups ~27 years                   | Significant interaction between genotype x life stress predicted CES-D scores in women (p = .022) but not in men (p = .471). Significant interaction of genotype x life stress in a model with genotype in a model with life stress in women (p=.025). In within-sex analyses, the genotype interaction predicted CES-D scores among women remained significant (p=.011).                                                                                                                      |
| Bull et al., 2009, United Kingdom | IL6   | rs1800795    | Becks Depression Inventory (BDI) in UK and SDS in USA.               | -n=98<br>-chronic HCV infection receiving IFN- $\alpha$ -2b and ribavirin.<br>- recruited in London, UK and Atlanta, GA, USA<br>- 46% female; 100% Caucasian | Subjects with CC genotype had fewer depressive symptoms at baseline compared to GG/GC genotypes (F=9.1, p=.002). At week 24, there was a significant effect size difference between CC and GG/GC groups. Subjects with CC genotype did not show a significant increase in depressive symptoms at any time point compared with baseline ( $\mu$ = 1.0); subjects with the GG/GC genotype showed a statistically significant increase in depressive symptoms at week 24 (p-value < 0.001–0.002). |
| Comasco et al., 2015, Sweden      | FKBP5 | rs3800373    | Trauma Symptom Checklist for Children (TSCC) - depression scale      | - n=394 adolescents from Upper Secondary School Study in Sweden; 45.7% female; mean age 17.2 $\pm$ 0.7 years                                                 | When comparing 3 genotypes (CC) among 2 groups (adverse life events [ALE]>90th percentile, ALE<90th percentile) the genotype on depression score was significant p=0.001 as well as Genotype x Environment (p<0.001)                                                                                                                                                                                                                                                                           |
|                                   |       | rs1360780    |                                                                      |                                                                                                                                                              | When comparing 3 genotypes (TT) among 2 groups (ALE>90th percentile, ALE<90th percentile) the effect of the Genotype on depression score was significant p=0.001 as well as Genotype x Environment (p<0.001)                                                                                                                                                                                                                                                                                   |



|                                            |         |                                                                                                                                                                                           |                                                             |                                                                                                                                                 |                                                                                                                                                                                                                                                                                                                                                                                                                                                                                                                                                                                                                                        |
|--------------------------------------------|---------|-------------------------------------------------------------------------------------------------------------------------------------------------------------------------------------------|-------------------------------------------------------------|-------------------------------------------------------------------------------------------------------------------------------------------------|----------------------------------------------------------------------------------------------------------------------------------------------------------------------------------------------------------------------------------------------------------------------------------------------------------------------------------------------------------------------------------------------------------------------------------------------------------------------------------------------------------------------------------------------------------------------------------------------------------------------------------------|
| Eszlari et al., 2016, Hungary              | MTHFD1L | rs11754661                                                                                                                                                                                | Weighted Brief Symptom Inventory (BSI) depression score     | - N=2204: Budapest, Hungary sample (n=895); Manchester, United Kingdom sample (n=1309)<br>- 69.9% female; mean age 32.9 ± 0.2 years; 100% White | A allele associates positively (significantly/trend) to BSI ( $p=0.090$ in an additive; $\beta=0.058$ in a dominant PL regression model).<br>In Manchester sample, no association with BSI ( $\beta=0$ in an additive; $\beta=0.107$ , $p$ dominant model)<br>In Budapest sample, A allele associates with BSI depression score ( $\beta=0.058$ in an additive; $\beta=0.151$ , $p$ dominant model)                                                                                                                                                                                                                                    |
| Fasching et al., 2012, Germany             | TPH2    | rs10879354<br>rs11178993<br>rs6582071<br>rs11178997<br>rs7955501<br>rs17110536<br>rs4760814<br>rs7300641<br>rs4760820<br>rs1487275<br>rs10879358<br>rs11615016<br>rs17110747<br>rs1872824 | Edinburgh Postnatal Depression Scale (EPDS)                 | - n= 361 pregnant female; 100% Caucasian                                                                                                        | A haplotype block in the p of TPH2 showed significant association with depression values during pregnancy and 6-8 months postpartum.<br>SNPs not included in any haplotype blocks were analyzed separately. Only rs10879354 showed a significant effect for time (1 and 2) and SNP ( $p < 0.04$ ), but no interaction ( $p < 0.79$ ).<br>Pairwise comparison of the two time points showed a significant increase in EPDS value at time 1 (prepartum) vs time 2 (48-72 h postpartum) ( $p = 0.00001$ ). When time 2 and time 1 values (48 months after birth) were compared, there was a significant increase in EPDS ( $p < 0.001$ ). |
| Favaro et al., 2014, Italy                 | SCL6A4  | 5-HTTLPR short variant and AG SNP rs25531                                                                                                                                                 | Depression subscale of the Hopkins Symptom Checklist (HSCL) | - n=34 females with no history of psychiatric disorders; mean age 25.6 ± 6.6 years; 100% Caucasian                                              | Significant interaction between the 5-HTTLPR genotype and the SCL6A4 genotype on depression scores (F (3, 21)=3.2, $p=0.014$ ; and F(3, 21)=3.2, $p=0.014$ ) using age as covariate (gender predicts different correlations between life stress and depression symptoms).                                                                                                                                                                                                                                                                                                                                                              |
| Fernández-de-las-Peñas et al., 2012, Spain | COMT    | rs4680                                                                                                                                                                                    | The hospital anxiety and depression scale (HADS)            | - n=100 women with fibromyalgia; mean age 52 ± 9 years                                                                                          | Women with the Met/Met genotype exhibited higher depression scores than those with Val/Val and Val/Met genotypes.                                                                                                                                                                                                                                                                                                                                                                                                                                                                                                                      |
| Gadow et al., 2014, USA                    | HTR2A   | rs6311                                                                                                                                                                                    | Child Symptom Inventory (CSI-4) Severity of symptoms        | - n=104 parents of children age 4-14 with ASD; 13% female; 90% White<br>- Long Island, NY, USA                                                  | Significant main effect of genotype on severity of disorder symptoms (F=5.20, $p=0.025$ ), with the A+ group having more severe depression than the A- group, but the effect was small ( $\eta^2=0.049$ ).<br>When severity of general disorder symptoms was controlled for (F=7.87, $p=0.006$ ), the effect of genotype was significant in the moderate range ( $\eta^2=0.049$ ).                                                                                                                                                                                                                                                     |
| Holz et al., 2015, Germany                 | FKBP5   | rs1360780                                                                                                                                                                                 | Beck Depression Inventory (BDI) mean score                  | - n=153 young adults; 57% female                                                                                                                | Significant genotype correlation between current BDI score and amygdala volume.                                                                                                                                                                                                                                                                                                                                                                                                                                                                                                                                                        |

|                                         |        |                                                                                                                                                                                                                        |                                                                                         |                                                                                                                                                               |                                                                                                                                                                                                                                                                                                                                                                                                                                                                                                                                                                                                                                                                                                                                   |
|-----------------------------------------|--------|------------------------------------------------------------------------------------------------------------------------------------------------------------------------------------------------------------------------|-----------------------------------------------------------------------------------------|---------------------------------------------------------------------------------------------------------------------------------------------------------------|-----------------------------------------------------------------------------------------------------------------------------------------------------------------------------------------------------------------------------------------------------------------------------------------------------------------------------------------------------------------------------------------------------------------------------------------------------------------------------------------------------------------------------------------------------------------------------------------------------------------------------------------------------------------------------------------------------------------------------------|
|                                         |        |                                                                                                                                                                                                                        |                                                                                         |                                                                                                                                                               | connectivity emerged in the<br>( $r = .67, p = 0.01$ ).<br>Genotype-specific correlation<br>BDI reached trend level in<br>( $r = -.22, p = 0.07$ ).<br>Genotype-specific correlation<br>significant in the CC group<br>0.16).<br>Significant correlation in<br>with the composite adult<br>scores.                                                                                                                                                                                                                                                                                                                                                                                                                                |
| Kim et al.,<br>2012, South<br>Korea     | SLC6A4 | 5HTTLPR                                                                                                                                                                                                                | Hamilton<br>Depression Rating<br>Scale (HAM-D)                                          | - n = 186 Korean<br>women with breast<br>Cancer; mean age 54<br>years                                                                                         | The patients with the short<br>5-HTTLPR had significant<br>D scores ( $p=0.047$ ).                                                                                                                                                                                                                                                                                                                                                                                                                                                                                                                                                                                                                                                |
| Kovacs-Nagy<br>et al., 2013,<br>Hungary | WFS1   | rs10002743<br>rs6824720<br>rs752854<br>rs4689393<br>rs10010131<br>rs13147655<br>rs4467645<br>rs13128674<br>rs6446482<br>rs4689395<br>rs28716718<br>rs1801208<br>rs734312<br>rs1046316<br>rs1046320<br>rs1046322 rs9457 | Hospital Anxiety and<br>Depression Scale-<br>Depression<br>Subscale (HADS)<br>frequency | - n = 801 Caucasian,<br>Hungarian participants;<br>53.8% female, mean<br>age 21.3<br>- mean age 21.3 yrs<br>- 46.2%, male<br>- 100% of Caucasian<br>- Hungary | Three WFS1 SNPs showed<br>association with depression<br>rs1046322 ( $p = 0.025$ ), rs1<br>( $p=0.009$ ), rs6824720 ( $p=$<br>However, after Bonferroni<br>SNP remained significant<br>0.0007).                                                                                                                                                                                                                                                                                                                                                                                                                                                                                                                                   |
| Kovacs et al.,<br>2016, Hungary         | IL6    | rs1800795                                                                                                                                                                                                              | Brief Symptom<br>Inventory (BSI) and<br>Zung Self-rating<br>Depression Scale<br>(ZSDS)  | -n=1053 European,<br>White participants; 70%<br>female; mean age 31.2<br>$\pm$ 10.5 years                                                                     | Interaction between rs1800795<br>recent negative life events<br>assuming an additive or recessive<br>heritability model, showed<br>associations both with ZSDS<br>depression scores. The interaction<br>rs1800795 with pain back<br>(PBGR) was significant as<br>additive and dominant heritability<br>case of BSI depression scores<br>assuming all three heritability<br>(additive, dominant, recessive)<br>case of ZSDS score.<br>After Bonferroni correction<br>affected significantly by the<br>RLE interaction using a recessive<br>For ZSDS scores, both additive and<br>recessive models of rs1800795<br>interaction remained significant<br>rs1800795 x PBGR interaction<br>additive and dominant models<br>significant. |
| Kurrikoff et al.<br>2012, Estonia       | NOS1   | NOS1 ex1f-VNTR                                                                                                                                                                                                         | Montgomery Asberg<br>Depression Rating<br>Scale (MADRS)                                 | - n = 936 youth between<br>ages 15-18 years;<br>27.9% female; 100%<br>Caucasian                                                                               | There is a significant three-way<br>interaction effect between<br>genotype, symptoms of depression<br>adverse life events ( $p=0.0007$ )<br>with one or two short alleles<br>adverse life events were not<br>have more depressive symptoms<br>similar relationship was found                                                                                                                                                                                                                                                                                                                                                                                                                                                      |

|                              |                |                                                                                                        |                                                                                                   |                                                                                                                                                                                                                                               |                                                                                                                                                                                                                                                                                                               |
|------------------------------|----------------|--------------------------------------------------------------------------------------------------------|---------------------------------------------------------------------------------------------------|-----------------------------------------------------------------------------------------------------------------------------------------------------------------------------------------------------------------------------------------------|---------------------------------------------------------------------------------------------------------------------------------------------------------------------------------------------------------------------------------------------------------------------------------------------------------------|
| Lenze et al., 2008U USA      | HTR1A<br>HTR2A | HTR1A rs6295 (-1019C/G)                                                                                | Geriatric Depression Scale (GDS)                                                                  | n = 145 elderly women who had a hip fracture; mean age 81.2 ± 6.7 years; 4.1% African American                                                                                                                                                | rs6295: those with a risk allele had significantly higher average GDS scores than those without the risk allele, controlling for time since hip fracture, age, comorbidities, and age at living ( $p = 0.009$ ).                                                                                              |
|                              |                | HTR2A rs6311 (-1438A/G)                                                                                |                                                                                                   |                                                                                                                                                                                                                                               |                                                                                                                                                                                                                                                                                                               |
| Lotrich et al., 2013, USA    | BDNF           | rs6265                                                                                                 | Montgomery-Asberg Depression Rating Scale (MADRS) severity; Beck Depression Inventory II (BDI-II) | - n= 124 euthymic patients during treatment with interferon-alpha therapy<br>- Val/Met + Met/Met group: 35% female; mean age 50.8 ± 11.7 years; 87.8% Caucasian<br>- Val/Val group: 26.5% female; mean age 47.1 ± 11.5 years; 87.4% Caucasian | rs6265 Met allele associated with increased MADRS scores ( $p<0.001$ ). Met allele only associated with an increase in symptom on BDI-II – sadness and worthlessness ( $p=0.001$ ) and interaction between BDNF polymorphism and 5-HTTLPR ( $p=0.21$ ).                                                       |
|                              | SLC6A4         | 5-HTTLPR                                                                                               |                                                                                                   |                                                                                                                                                                                                                                               |                                                                                                                                                                                                                                                                                                               |
| Lovallo et al., 2014, USA    | SCL6A4         | 5-HTTLPR. rs25531: low activity (SS, SLG, LGLG); Medium activity (SLA, LALG); and High activity (LALA) | Beck's Depression Inventory (BDI) score                                                           | - n=314 healthy young adults with and without a family history (FH) of alcoholism; 57% female; mean age 23.5 years; predominantly White                                                                                                       | Significantly more symptoms of depression among the FH group, the High activity 5-HTTLPR subgroup ( $t = 3.31, p= 0.001$ ) compared to their Low/Medium activity counterparts. Multivariable analysis indicated statistically significant 5-HTTLPR interaction terms for depression ( $F = 6.80, p = .022$ ). |
| Ming et al., 2013, China     | SLC6A4         | 5HTTLPR (rs25531)                                                                                      | Center for Epidemiologic studies Depression Scale (CES-D)                                         | - n = 252 healthy, Chinese students; 52% female; mean age 16 ± 0.6 years                                                                                                                                                                      | No significant association between 5-HTTLPR polymorphism and symptoms of depression.                                                                                                                                                                                                                          |
| Nilsson et al., 2014, Sweden | TFAP-2 $\beta$ | intron 1 Variable Number Tandem Repeat (VNTR)                                                          | Depression Self-Rating Scale (DSRS) severity                                                      | -Two independent cross-sectional samples from Sweden: Group A (n = 175; 62% female; all 19 year olds) and Group B (n = 1506; 48% female)                                                                                                      | Group A: Significant main effect of genotype and symptom severity on ADHD on DSRS scores for Group B: No effect of genotype on DSRS scores.                                                                                                                                                                   |
| Porcelli et al., 2015, Italy | HTR1A          | C-10119G of the (CC, CG, GG)                                                                           | Hospital Anxiety and Depression Scale-Depression Subscale (HADS-D)                                | - n =130 patients with chronic hepatitis C referred to tertiary care center for interferon (IFN) and ribavirin treatment; 53.3% female; mean age 51.1 ± 12.2 years<br>- male,47.7%                                                            | Significant difference in HADS-D scores between those with C/C, C/G, and G/G genotypes at 3 months (Mean 3.89, 5.44, 8.75, $p=0.002$ ) and at End of Treatment (Mean=3.47, 4.60, 8.75, $p=0.002$ ).                                                                                                           |

|                                      |                         |                                                              |                                                                                                                                                                                                                                                                                                                                                                    |                                                                                                                                                                                                                                                      |                                                                                                                                                                                                                                                                                                                                                                                                                                                                                                                                                                                                             |
|--------------------------------------|-------------------------|--------------------------------------------------------------|--------------------------------------------------------------------------------------------------------------------------------------------------------------------------------------------------------------------------------------------------------------------------------------------------------------------------------------------------------------------|------------------------------------------------------------------------------------------------------------------------------------------------------------------------------------------------------------------------------------------------------|-------------------------------------------------------------------------------------------------------------------------------------------------------------------------------------------------------------------------------------------------------------------------------------------------------------------------------------------------------------------------------------------------------------------------------------------------------------------------------------------------------------------------------------------------------------------------------------------------------------|
| Rawson et al., 2015, USA             | BDNF<br>HTR1A<br>SLC6A4 | rs6265<br>rs6295<br>5HTTLPR-rs25531                          | Montgomery<br>Asberg Depression<br>Rating Scale<br>(MADRS)                                                                                                                                                                                                                                                                                                         | - n = 429 adults with<br>hip fractures; 76%<br>female; mean age 78.9<br>± 8.5 years<br>- n = 92 healthy<br>comparisons; 65%<br>female; mean age 78.3<br>± 7.1 years;<br>Combined sample:<br>93% White                                                | BDNF Met/met carriers de<br>significantly more depress<br>than Val/Val carriers ( $p = 0.006$ ).<br>Epistatic effect between B<br>5HTTLPR-rs25531:2 LA a<br>BDNF Met/Met genotype<br>depressive symptoms afte<br>( $p = 0.006$ ).                                                                                                                                                                                                                                                                                                                                                                           |
| Saad et al., 2014, USA               | INFG1<br>TNFA<br>IL6    | rs9376268<br>rs1799964<br>rs2069840                          | Center for<br>Epidemiologic<br>studies Depression<br>Scale (CES-D) used<br>to determine<br>symptom trajectory<br>classes: Resilient<br>(low CES-D that<br>decreased slightly<br>over 6 months) and<br>Subsyndromal<br>(CES-D that was<br>just above clinically<br>meaningful cut-point<br>that increased<br>slightly then<br>decreased slightly<br>over 6 months). | - Women who<br>underwent breast<br>cancer surgery on one<br>breast with no<br>metastasis<br>- Resilient class: n =<br>155; mean age 57.3 ±<br>11 years; 69.5% White<br>- Subsyndromal class:<br>n = 180; mean age 53<br>± 11.9 years; 62.6%<br>White | rs9376268: Carrying A allele (GA/AA) was associated with a 1.5x increase in the odds of being in the subsyndromal class (OR = 1.5, $p = 0.022$ ) while controlling for age and education score.<br>rs1799964: Homozygous A allele (TT/TC vs CC) associated with a 0.87% decrease in odds of being in the subsyndromal class. (OR = 0.87, $p = 0.023$ ) while controlling for age and education score.<br>rs2069840: Homozygous A allele (CC/CG vs GG) associated with a 3.06x increase in odds of being in the Subsyndromal class. (OR = 3.06, $p = 0.023$ ) while controlling for age and education score. |
| Sasaki et al., 2016, Japan           | CRH<br>CRH-BP           | rs28364015<br>rs6472258<br>rs10474485                        | Self-rating<br>Depression Scale<br>(SDS)                                                                                                                                                                                                                                                                                                                           | - N = 253 adults with<br>IBS or healthy<br>- n = 111 IBS patients;<br>58% female; mean age<br>21.9 ± 2 years<br>- n = 142 healthy<br>controls; 46% female;<br>mean age 22 ± 2.3<br>years                                                             | rs10474485 A allele associated with lower SDS scores ( $p = 0.003$ ).<br>In the male subjects, there was a significant group (IBS/control) interaction for the rs10474485 genotype in the SDS scores.<br>In those with IBS-Mixed symptoms (diarrhea & constipation), there was a significantly higher SDS score with the rs10474485 CC genotype compared to those with AA or AC genotypes ( $p = 0.03$ ).                                                                                                                                                                                                   |
| Van der Auwera et al., 2014, Germany | TPH2<br>SLC6A4          | rs7305115<br>5-HTTLPR (Short and Long variants)<br>- rs25531 | Beck Depression<br>Inventory II (BDI-II)<br>for LEGEND study.<br>Patient Health<br>Questionnaire<br>(PHQ-9) for TREND<br>scores.                                                                                                                                                                                                                                   | Two independent<br>samples (LEGEND &<br>TREND) of Caucasian<br>adults from the study of<br>health in Pomerania,<br>Germany:<br>- LEGEND sample: n =<br>2029; 52% female<br>- TREND sample n =<br>2475; 51% female.                                   | Significant interaction effect between TPH2 rs7305115 x 5-HTTLPR genotype) on depression ( $p = 0.023$ ): 5-HTTLPR SS genotype associated with increased depression scores after childhood abuse in carriers of low expression of TPH2 genotype, whereas there was an opposite relationship with TPH2 genotype. .                                                                                                                                                                                                                                                                                           |
| Vinkers et al., 2015, Netherlands    | MR gene<br>NR3C2        | MR haplotypes<br>(GA, CA, & CG;<br>rs2070951 and<br>rs5522)  | Population-based<br>cohort: Beck's<br>Depression Index<br>(BDI) score<br><br>Clinical cohort:<br>Inventory of<br>Depressive                                                                                                                                                                                                                                        | Two sample cohorts:<br>- n = 665 population-<br>based cohort of young<br>adults and adolescents;<br>56% female; mean age<br>21 years.<br>- n = 1639 participants<br>from Netherlands<br>Study of Depression                                          | CA haplotype moderated the relationship between child maltreatment and depressive symptoms in both cohorts ( $p < 0.03$ ). Relationships were sex-dependent: females in the population-based cohort were protected from depression whereas males in the clinical cohort were at increased risk ( $p = 0.03$ ). Decreased lifetime risk for depression in females with the CA haplotype.                                                                                                                                                                                                                     |

|                           |        |                   |                                                                                    |                                                                                                                                                                                                                                                                                                                                                                    |                                                                                                                                                                              |
|---------------------------|--------|-------------------|------------------------------------------------------------------------------------|--------------------------------------------------------------------------------------------------------------------------------------------------------------------------------------------------------------------------------------------------------------------------------------------------------------------------------------------------------------------|------------------------------------------------------------------------------------------------------------------------------------------------------------------------------|
|                           |        |                   | Symptomatology (IDS-SR30) score                                                    | and Anxiety (current or past anxiety or depression disorder and healthy controls); 66% female; mean age 42 years.                                                                                                                                                                                                                                                  | was identified in male GA increased risk for male CA clinical sample.                                                                                                        |
| Xu et al., 2013, China    | SLC6A4 | 5HTTLPR (rs25531) | Hamilton Depression Rating Scale (HDRS) severity                                   | - n = 96 SLE patients; - n = 96 healthy controls matched by age & sex Combined demographics: 76% female, 100% Han Chinese.                                                                                                                                                                                                                                         | There was a higher frequency of the Met allele (L) in non-depressive SLE ( $p=0.006$ ). Homozygotes reported significantly higher mean HDRS score with SL/LL genotypes.      |
| Zhang et al., 2016, China | BDNF   | rs6265            | Children's Depression Inventory (CDI) score                                        | - n = 780 Han Chinese adolescents drawn from Beijing Twin Study (only 2 <sup>nd</sup> born child was genotyped); 51% female; mean age 13.6 years.                                                                                                                                                                                                                  | rs6265 significantly moderated the relationship between relationship between maternal warmth and depressive symptoms. Variants with less depressive symptoms in homozygotes. |
| Zhou et al., 2013, China  | BDNF   | rs6265            | Center for Epidemiologic studies Depression Scale (CES-D) Chinese version severity | - n = 296 type 2 diabetes (T2DM) patients; this group was divided into 2 subgroups – depressive (DDM) and non-depressive (NDDM)<br>- n = 70 healthy volunteers<br>- Han Chinese<br>- Mean age of NDDM group 53.1, Mean age of DDM group 54.3<br>- NDDM group: 44.4% of female, DDM group: 70.3% of female<br><br>- The diabetes group was divided into 2 subgroups | The DDM group were more carriers of the Met allele (L) than the NDDM (38.8%) and healthy controls (39.3%) ( $p<0.05$ ).                                                      |

**Abbreviations:**

BDI = Beck Depression Inventory  
BDI-I = Beck Depression Inventory I  
BDI-II = Beck Depression Inventory II  
BSI = Brief Symptom Inventory  
CDI = Children's Depression Inventory  
CES-D = Center for Epidemiologic studies Depression Scale  
CSI-4 = Child Symptom Inventory  
DDM = depressive diabetes group  
DID = Diagnostic Inventory for Depression  
DSRS = Depression Self-Rating Scale  
DSM-IV = Diagnostic and Statistical Manual of Mental Disorders IV  
EPDS = Edinburgh Postnatal Depression Scale  
FMS = Fibromyalgia Syndrome

GDS = Geriatric Depression Scale  
HADS = Hospital Anxiety and Depression Scale-Depression Subscale  
HAM-D = Hamilton Depression Rating Scale  
HDRS = Hamilton Depression Rating Scale  
HSCL = Depression subscale of the Hopkins Symptom Checklist  
IDSR-30 = Inventory of Depressive Symptomology  
KPS = Karnofsky Performance Scale  
MADRS = Montgomery Asberg Depression Rating Scale  
NDDM = non- depressive diabetes group  
PHQ-9 = Patient health questionnaire  
SDS = Self-rating Depression Scale  
SDQ = Strengths and difficulties questionnaire- depression subscale  
SDS = Zung Self-Rating Depression Scale  
SLE = systemic lupus erythematosus  
ZSDS = Zung Self-Rating Depression Scale

## References

- Avery, B. M., & Vrshek-Schallhorn, S. (2016). Nonsynonymous HTR2C polymorphism predicts cortisol response to psychosocial stress I: Effects in males and females. *Psychoneuroendocrinology*, *70*, 134-141. doi:10.1016/j.psyneuen.2015.12.023
- Bull, S. J., Huezio-Diaz, P., Binder, E. B., Cubells, J. F., Ranjith, G., Maddock, C., . . . Pariante, C. M. (2009). Functional polymorphisms in the interleukin-6 and serotonin transporter genes, and depression and fatigue induced by interferon-alpha and ribavirin treatment. *Mol Psychiatry*, *14*(12), 1095-1104. doi:10.1038/mp.2008.48
- Brummett, B. H., Babyak, M. A., Williams, R. B., Harris, K. M., Jiang, R., Kraus, W. E., . . . Siegler, I. C. (2014). A putatively functional polymorphism in the HTR2C gene is associated with depressive symptoms in white females reporting significant life stress. *PLoS ONE*, *9*(12), e114451. doi:10.1371/journal.pone.0114451
- Comasco, E., Gustafsson, P. A., Sydsjo, G., Agnafors, S., Aho, N., & Svedin, C. G. (2015). Psychiatric symptoms in adolescents: FKBP5 genotype--early life adversity interaction effects. *Eur Child Adolesc Psychiatry*, *24*(12), 1473-1483. doi:10.1007/s00787-015-0768-3
- Eszlari, N., Kovacs, D., Petschner, P., Pap, D., Gonda, X., Elliott, R., . . . Juhasz, G. (2016). Distinct effects of folate pathway genes MTHFR and MTHFD1L on ruminative response style: a potential risk mechanism for depression. *Transl Psychiatry*, *6*, e745. doi:10.1038/tp.2016.19
- Fasching, P. A., Faschingbauer, F., Goecke, T. W., Engel, A., Häberle, L., Seifert, A., . . . Burger, P. (2012). Genetic variants in the tryptophan hydroxylase 2 gene (TPH2) and depression during and after pregnancy. *Journal of psychiatric research*, *46*(9), 1109-1117.
- Favaro, A., Manara, R., Pievani, M., Clementi, M., Forzan, M., Bruson, A., . . . Santonastaso, P. (2014). Neural signatures of the interaction between the 5-HTTLPR genotype and stressful life events in healthy women. *Psychiatry Res*, *223*(2), 157-163. doi:10.1016/j.psychresns.2014.05.006
- Fernández-de-las-Peñas, C., Ambite-Quesada, S., Gil-Crujera, A., Cigarán-Méndez, M., & Peñacoba-Puente, C. (2012). Catechol-O-methyltransferase Val158Met polymorphism influences anxiety, depression, and disability, but not pressure pain sensitivity, in women with fibromyalgia syndrome. *The Journal of Pain*, *13*(11), 1068-1074.
- Gadow, K. D., Smith, R. M., & Pinsonneault, J. K. (2014). Serotonin 2A receptor gene (HTR2A) regulatory variants: pPossible association with severity of depression symptoms in children with autism spectrum disorder. *Cogn Behav Neurol*, *27*(2), 107-116. doi:10.1097/wnn.0000000000000028
- Holz, N. E., Buchmann, A. F., Boecker, R., Blomeyer, D., Baumeister, S., Wolf, I., . . . Laucht, M. (2015). Role of FKBP5 in emotion processing: Results on amygdala activity, connectivity and volume. *Brain Struct Funct*, *220*(3), 1355-1368. doi:10.1007/s00429-014-0729-5
- Kim, K. R., Chung, H. C., Lee, E., Kim, S. J., & Namkoong, K. (2012). Body image, sexual function and depression in Korean patients with breast cancer: modification by 5-HTT polymorphism. *Supportive Care in Cancer*, *20*(9), 2177-2182.
- Kovacs, D., Eszlari, N., Petschner, P., Pap, D., Vas, S., Kovacs, P., . . . Juhasz, G. (2016). Interleukin-6 promoter polymorphism interacts with pain and life stress influencing depression phenotypes. *J Neural Transm (Vienna)*, *123*(5), 541-548. doi:10.1007/s00702-016-1506-9
- Kovacs-Nagy, R., Elek, Z., Szekely, A., Nanasi, T., Sasvari-Szekely, M., & Ronai, Z. (2013). Association of aggression with a novel microRNA binding site polymorphism in the wolframin gene. *American Journal of Medical Genetics Part B: Neuropsychiatric Genetics*, *162*(4), 404-412.



- Kurrikoff T, Lesch KP, Kiive E, Konstabel K, Herterich S, Veidebaum T, Reif A, Harro J. (2012). Association of a functional variant of the nitric oxide synthase 1 gene with personality, anxiety, and depressiveness. *Dev Psychopathol.* 24(4):1225-1235. doi: 10.1017/S0954579412000661.
- Lenze, E. J., Shardell, M., Ferrell, R. E., Orwig, D., Yu-Yahiro, J., Hawkes, W., . . . Magaziner, J. (2008). Association of serotonin-1A and 2A receptor promoter polymorphisms with depressive symptoms and functional recovery in elderly persons after hip fracture. *Journal of affective disorders*, 111(1), 61-66.
- Lotrich, F. E., Albusaysi, S., & Ferrell, R. E. (2013). Brain-derived neurotrophic factor serum levels and genotype: association with depression during interferon- $\alpha$  treatment. *Neuropsychopharmacology*, 38(6), 985.
- Lovallo, W. R., Enoch, M. A., Yechiam, E., Glahn, D. C., Acheson, A., Sorocco, K. H., . . . Goldman, D. (2014). Differential impact of serotonin transporter activity on temperament and behavior in persons with a family history of alcoholism in the Oklahoma Family Health Patterns Project. *Alcohol Clin Exp Res*, 38(6), 1575-1581. doi:10.1111/acer.12412
- Ming, Q.-s., Zhang, Y., Chai, Q.-l., Chen, H.-y., Hou, C.-j., Wang, M.-c., . . . Yi, J.-y. (2013). Interaction between a serotonin transporter gene promoter region polymorphism and stress predicts depressive symptoms in Chinese adolescents: a multi-wave longitudinal study. *BMC psychiatry*, 13(1), 142.
- Nilsson, K. W., Sonnby, K., Nordquist, N., Comasco, E., Leppert, J., Orelund, L., & Sjöberg, R. L. (2014). Transcription Factor Activating Protein-2 $\beta$  (TFAP-2 $\beta$ ) genotype and symptoms of attention deficit hyperactivity disorder in relation to symptoms of depression in two independent samples. *European child & adolescent psychiatry*, 23(4), 207-217.
- Porcelli, P., Cozzolongo, R., Cariola, F., Giannuzzi, V., Lanzilotta, E., Gentile, M., . . . Leandro, G. (2015). Genetic Associations of Alexithymia in Predicting Interferon-Induced Depression in Chronic Hepatitis C. *Psychopathology*, 48(6), 417-420. doi:10.1159/000441682
- Rawson, K. S., Dixon, D., Nowotny, P., Ricci, W. M., Binder, E. F., Rodebaugh, T. L., . . . Lenze, E. J. (2015). Association of functional polymorphisms from brain-derived neurotrophic factor and serotonin-related genes with depressive symptoms after a medical stressor in older adults. *PLoS ONE*, 10(3), e0120685. doi:10.1371/journal.pone.0120685
- Saad, S., Dunn, L. B., Koetters, T., Dhruva, A., Langford, D. J., Merriman, J. D., . . . Miaskowski, C. (2014). Cytokine gene variations associated with subsyndromal depressive symptoms in patients with breast cancer. *Eur J Oncol Nurs*, 18(4), 397-404. doi:10.1016/j.ejon.2014.03.009
- Sasaki, A., Sato, N., Suzuki, N., Kano, M., Tanaka, Y., Kanazawa, M., . . . Fukudo, S. (2016). Associations between Single-Nucleotide Polymorphisms in Corticotropin-Releasing Hormone-Related Genes and Irritable Bowel Syndrome. *PLoS ONE*, 11(2), e0149322. doi:10.1371/journal.pone.0149322
- Van der Auwera, S., Janowitz, D., Schulz, A., Homuth, G., Nauck, M., Volzke, H., . . . Grabe, H. J. (2014). Interaction among childhood trauma and functional polymorphisms in the serotonin pathway moderate the risk of depressive disorders. *Eur Arch Psychiatry Clin Neurosci*, 264 Suppl 1, S45-54. doi:10.1007/s00406-014-0536-2
- Vinkers, C. H., Joels, M., Milaneschi, Y., Gerritsen, L., Kahn, R. S., Penninx, B. W., & Boks, M. P. (2015). Mineralocorticoid receptor haplotypes sex-dependently moderate depression susceptibility following childhood maltreatment. *Psychoneuroendocrinology*, 54, 90-102. doi:10.1016/j.psyneuen.2015.01.018
- Xu, J., Cheng, Y., Chen, B., Bai, R., Li, S., Xu, X., . . . Zeng, X. (2013). Depression in systemic lupus erythematosus patients is associated with link-polymorphism but not methylation status of the 5HTT promoter region. *Lupus*, 22(10), 1001-1010. doi:10.1177/0961203313498793
- Zhang, L., Li, Z., Chen, J., Li, X., Zhang, J., & Belsky, J. (2016). The BDNF Val66Met Polymorphism Interacts with Maternal Parenting Influencing Adolescent Depressive Symptoms: Evidence of Differential Susceptibility Model. *J Youth Adolesc*, 45(3), 471-483. doi:10.1007/s10964-015-0378-x
- Zhou, J.-X., Li, H.-C., Bai, X.-J., Chang, B.-C., Li, C.-J., Sun, P., & Chen, L.-M. (2013). Functional Val66Met polymorphism of Brain-derived neurotrophic factor in type 2 diabetes with depression in Han Chinese subjects. *Behavioral and Brain Functions*, 9(1), 34.

## Supplemental Figure 4. Fatigue Search Results

PubMed Search Terms:  
 (functional polymorphism) AND  
 ("fatigue" OR "lack of energy")  
**n=49**

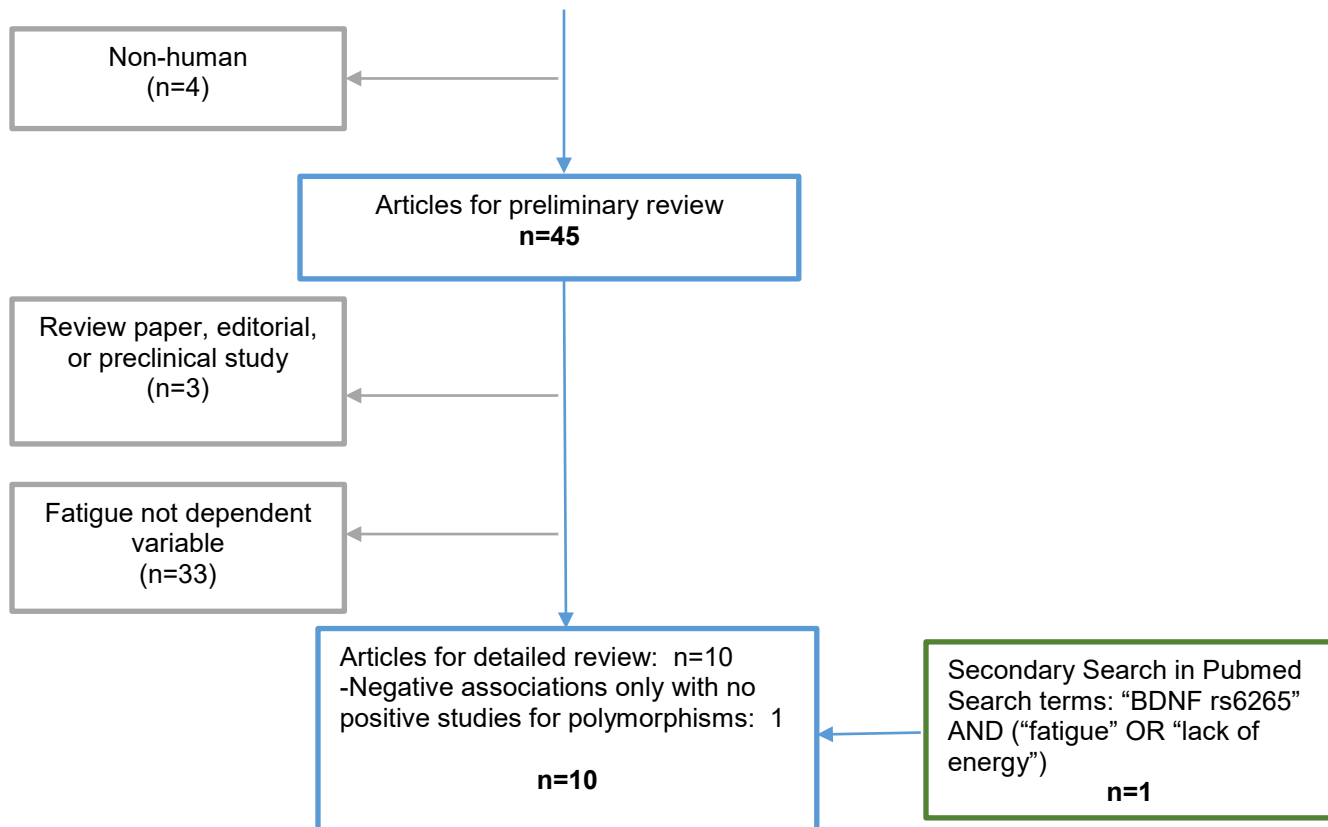

**Notes:** Articles with chronic fatigue syndrome as the outcome (phenotype) were excluded from this search.

**Supplementary Table 4. Evidence of Associations Between Fatigue and Genetic Polymorphisms**

| Author, Year, Country             | Gene         | Polymorphism | Fatigue Symptom Phenotype(s) | Context (i.e., sample details)                                                                                                                                                                         | Relevant Findings                                                                                                       |
|-----------------------------------|--------------|--------------|------------------------------|--------------------------------------------------------------------------------------------------------------------------------------------------------------------------------------------------------|-------------------------------------------------------------------------------------------------------------------------|
| Aouizerat et al., 2015, USA       | <i>IL2</i>   | rs1479923    | severity                     | - n = 252 patients who had primary or adjuvant radiation therapy and their family caregivers<br>- Mean age 61.5 years; most participants were female, Caucasian, well educated, and married/partnered. | Being homozygous for the rare T associated with a 75% decrease in belonging to the low morning ene                      |
|                                   | <i>NFKB1</i> | rs4648110    |                              |                                                                                                                                                                                                        | Being heterozygous or homozygous allele was associated with a 42% odds of belonging to the low morning (p=.046).        |
|                                   | <i>IL1R2</i> | rs4141134    |                              |                                                                                                                                                                                                        | Heterozygous or homozygous for was associated with a 64% decrease belonging to the moderate evening (p=.019).           |
|                                   | <i>IL6</i>   | rs4719714    |                              |                                                                                                                                                                                                        | Being heterozygous or homozygous allele was associated with a 73% odds of belonging to the moderate class (p=.001).     |
|                                   | <i>IL17A</i> | rs8193036    |                              |                                                                                                                                                                                                        | Being heterozygous or homozygous allele was associated with a 61% odds of belonging to the moderate class (p=.011).     |
|                                   | <i>NFKB2</i> | rs1056890    |                              |                                                                                                                                                                                                        | Being homozygous for the rare T associated with a 9.7-fold increase belonging to the moderate evening (p=.032).         |
|                                   | <i>TNFA</i>  | rs1800683    |                              |                                                                                                                                                                                                        | Being homozygous for the rare A associated with a 64% decrease in belonging to the moderate evening (p=.022)            |
| Aouizerat et al., 2009, USA       | <i>TNFA</i>  | rs1800629    | severity                     | - n = 253 cancer outpatients (168 patients with breast, prostate, lung, or brain cancer and 85 of their family caregivers)<br>- 53.8% female; mean age 61.4 ± 11.3 years; 74.6% White                  | Controlling for age, common allele a mean morning fatigue score that points higher than minor allele car                |
| Bull et al., 2009, United Kingdom | <i>IL-6</i>  | rs1800795    | severity                     | - n = 98<br>- Caucasian,<br>- chronic HCV infection with compensated liver disease                                                                                                                     | <i>IL-6</i> rs1800795 was not associated with fatigue (p=.2); 5-HTT: p=.5).                                             |
|                                   | 5-HTT        | 5-HTTLPR     |                              |                                                                                                                                                                                                        | 5-HTT 5-HTTLPR was not associated with fatigue (p=.5).                                                                  |
| Eshragh et al., 2017, USA         | <i>ADRB2</i> | rs1042718    | severity                     | - n = 397 women who underwent unilateral breast                                                                                                                                                        | Carry one or two doses of the rare associated with an 87% lower odds of belonging to the higher fatigue class (p=.008). |

|                                  |               |                   |          |                                                                                                                                                                     |                                                                                                                                                                                                  |
|----------------------------------|---------------|-------------------|----------|---------------------------------------------------------------------------------------------------------------------------------------------------------------------|--------------------------------------------------------------------------------------------------------------------------------------------------------------------------------------------------|
|                                  | BDNF          | rs6265            |          | cancer surgery                                                                                                                                                      | Carry one or two doses of the rare associated with a 50% lower odds higher fatigue class ( $p=.020$ ).                                                                                           |
|                                  | COMT          | rs9332377         |          |                                                                                                                                                                     | Carry one or two doses of the rare associated with a 52% lower odds higher fatigue class ( $p=.026$ ).                                                                                           |
|                                  | CYP3A4        | rs4646437         |          |                                                                                                                                                                     | Carry one or two doses of the rare associated with a 52% lower odds higher fatigue class ( $p=.025$ ).                                                                                           |
|                                  | GALR1         | rs949060          |          |                                                                                                                                                                     | Carry two doses of the rare C allele with a 2.46-fold higher odds of being in higher fatigue class ( $p=.020$ ).                                                                                 |
|                                  | GCH1          | rs3783642         |          |                                                                                                                                                                     | Carry one or two doses of the rare associated with a 53% lower odds higher fatigue class ( $p=.014$ ).                                                                                           |
|                                  | NOS1          | rs9658498         |          |                                                                                                                                                                     | Carry two doses of the rare C allele with a 55% lower odds of belonging to higher fatigue class ( $p=.029$ ).                                                                                    |
|                                  | NOS1          | rs2293052         |          |                                                                                                                                                                     | Carry two doses of the rare T allele with a 4.58-fold higher odds of being in higher fatigue class ( $p=.004$ ).                                                                                 |
|                                  | NPY1R         | Haplotype A04     |          |                                                                                                                                                                     | Each additional does of NPY1R H associated with a 1.77-fold higher odds to the higher fatigue class ( $p=.003$ ).                                                                                |
|                                  | SLC6A2        | rs17841327        |          |                                                                                                                                                                     | Carry two doses of the rare A allele with a 10.31-fold higher odds of being in higher fatigue class ( $p=.003$ ).                                                                                |
|                                  | SLC6A4        | 5HTTLPR + rs25531 |          |                                                                                                                                                                     | Carry one or two doses of the LA allele with a 47% lower odds of belonging to higher fatigue class ( $p=.023$ ).                                                                                 |
| Malyuchenko et al., 2010, Russia | DAT1          | VNTR              | severity | - n = 140 student volunteers<br>- 50% female; mean age 20 ± 1 years                                                                                                 | A significant relationship between DAT1 and COMT gene polymorphism and mental sphere status were revealed. These polymorphisms were the most frequent in these girls.                            |
|                                  | DRD2          | Taq I             |          |                                                                                                                                                                     |                                                                                                                                                                                                  |
|                                  | COMT          | Val66Met          |          |                                                                                                                                                                     |                                                                                                                                                                                                  |
| Miaskowski et al., 2010, USA     | IL-6          | rs4719714         | severity | - n = 253 (168 patients with breast, prostate, lung, or brain cancer and 85 of their family caregivers).<br>- 53.8% female; mean age 61.4 ± 11.3 years; 74.6% White | Common allele homozygotes reported evening fatigue ( $p = .003$ ), morning fatigue, and sleep disturbance ( $p=.003$ ) than carriers.                                                            |
| Piraino et al., 2012, Australia  | IFN- $\gamma$ | rs2430561         | severity | - n = 296 Caucasian, adult participants in the Dubbo Infection Outcomes Study                                                                                       | The T allele of the IFN- $\gamma$ +874 T/A polymorphism was associated with increased fatigue. In addition, females were more likely to be in the higher fatigue extreme ( $p = 0.01$ ) while in |

|                           |               |           |           |                                                                                                                                                                                       |                                                                                                                                                                                                                                         |
|---------------------------|---------------|-----------|-----------|---------------------------------------------------------------------------------------------------------------------------------------------------------------------------------------|-----------------------------------------------------------------------------------------------------------------------------------------------------------------------------------------------------------------------------------------|
|                           |               |           |           | - 49% women; mean age 34.2 years                                                                                                                                                      | infection were less likely to suffer ( $p = .02$ ).                                                                                                                                                                                     |
| Udina et al., 2013, Spain | IL-6          | rs1800795 | intensity | - n = 385 Caucasian outpatients with chronic hepatitis C who were starting IFN-alpha and ribavirin treatments<br>- 44% female; mean age 44.2 ± 10.2 years                             | Baseline values of the VAS scale differences between GG & GC and ( $p = 0.046$ )                                                                                                                                                        |
| Illi et al., 2012, USA    | IL-4          | rs2243248 | severity  | - n = 253 cancer outpatients (168 patients with breast, prostate, lung, or brain cancer and 85 of their family caregivers)<br>- 53.8% female; mean age 61.4 ± 11.3 years; 74.6% White | Carrying the minor allele for IL4 rs2243248 was associated with over a sixfold increase in the odds of belonging to the "All high" latent class (vs a FC), having a lower functional status, and a higher number of comorbid conditions |
| Doong et al., 2015, USA   | IL-6          | rs2069845 |           | - n = 398 women who underwent unilateral breast cancer surgery                                                                                                                        | rs2069845 significantly associated with latent class membership ( $p = .013$ ).                                                                                                                                                         |
|                           | IL-13         | rs1295686 |           |                                                                                                                                                                                       | rs1295686 significantly associated with latent class membership ( $p = .013$ ).                                                                                                                                                         |
|                           | TNF- $\alpha$ | rs1800610 |           | rs1800610 significantly associated with latent class membership ( $p = .040$ ).                                                                                                       |                                                                                                                                                                                                                                         |

**Abbreviations:**

FC: Family caregiver

RRV: Ross River Virus

VAS: Visual analogic scale

**References:**

Aouizerat, B. E., Dhruva, A., Paul, S. M., Cooper, B. A., Kober, K. M., & Miaskowski, C. (2015). Phenotypic and molecular evidence suggests that decrements in morning and evening energy are distinct but related symptoms. *Journal of pain and symptom management*, 50(5), 599-614.

Aouizerat, B. E., Dodd, M., Lee, K., West, C., Paul, S. M., Cooper, B. A., ... & Miaskowski, C. (2009). Preliminary evidence of a genetic association between tumor necrosis factor alpha and the severity of sleep disturbance and morning fatigue. *Biological research for nursing*, 11(1), 27-41.

Bull, S. J., Huezio-Diaz, P., Binder, E. B., Cubells, J. F., Ranjith, G., Maddock, C., ... & Norris, S. (2009). Functional polymorphisms in the interleukin-6 and serotonin transporter genes, and depression and fatigue induced by interferon- $\alpha$  and ribavirin treatment. *Molecular psychiatry*, 14(12), 1095.

Eshragh, J., Dhruva, A., Paul, S. M., Cooper, B. A., Mastick, J., Hamolsky, D., ... & Kober, K. M. (2017). Associations Between Neurotransmitter Genes and Fatigue and Energy Levels in Women After Breast Cancer Surgery. *Journal of pain and symptom management*, 53(1), 67-84.

Malyuchenko, N. V., Schegolkova, J. V., Kulikova, M. A., Timofeeva, M. A., Shlepzova, V. A., Sysoeva, O. V., ... & Tonevitsky, A. G. (2010). Effects of genetic variations in the dopaminergic system on fatigue in humans: gender aspects. *Bulletin of experimental biology and medicine*, 149(2), 226-232.

Miaskowski, C., Dodd, M., Lee, K., West, C., Paul, S. M., Cooper, B. A., ... & Aouizerat, B. E. (2010). Preliminary evidence of an association between a functional interleukin-6 polymorphism and fatigue and sleep disturbance in oncology patients and their family caregivers. *Journal of pain and symptom management*, 40(4), 531-544.

Piraino, B., Vollmer-Conna, U., & Lloyd, A. R. (2012). Genetic associations of fatigue and other symptom domains of the acute sickness response to infection. *Brain, behavior, and immunity*, 26(4), 552-558.

Udina, M., Moreno-España, J., Navinés, R., Giménez, D., Langohr, K., Gratacòs, M., ... & Martín-Santos, R. (2013). Serotonin and interleukin-6: the role of genetic polymorphisms in IFN-induced neuropsychiatric symptoms. *Psychoneuroendocrinology*, 38(9), 1803-1813.

Illi, J., Miaskowski, C., Cooper, B., Levine, J. D., Dunn, L., West, C., ... & Cataldo, J. (2012). Association between pro-and anti-inflammatory cytokine genes and a symptom cluster of pain, fatigue, sleep disturbance, and depression. *Cytokine*, 58(3), 437-447.

Doong, S. H., Dhruva, A., Dunn, L. B., West, C., Paul, S. M., Cooper, B. A., ... & Leutwyler, H. (2015). Associations between cytokine genes and a symptom cluster of pain, fatigue, sleep disturbance, and depression in patients prior to breast cancer surgery. *Biological research for nursing*, 17(3), 237-247.

## **Supplemental Figure 5. Pain Search Results**



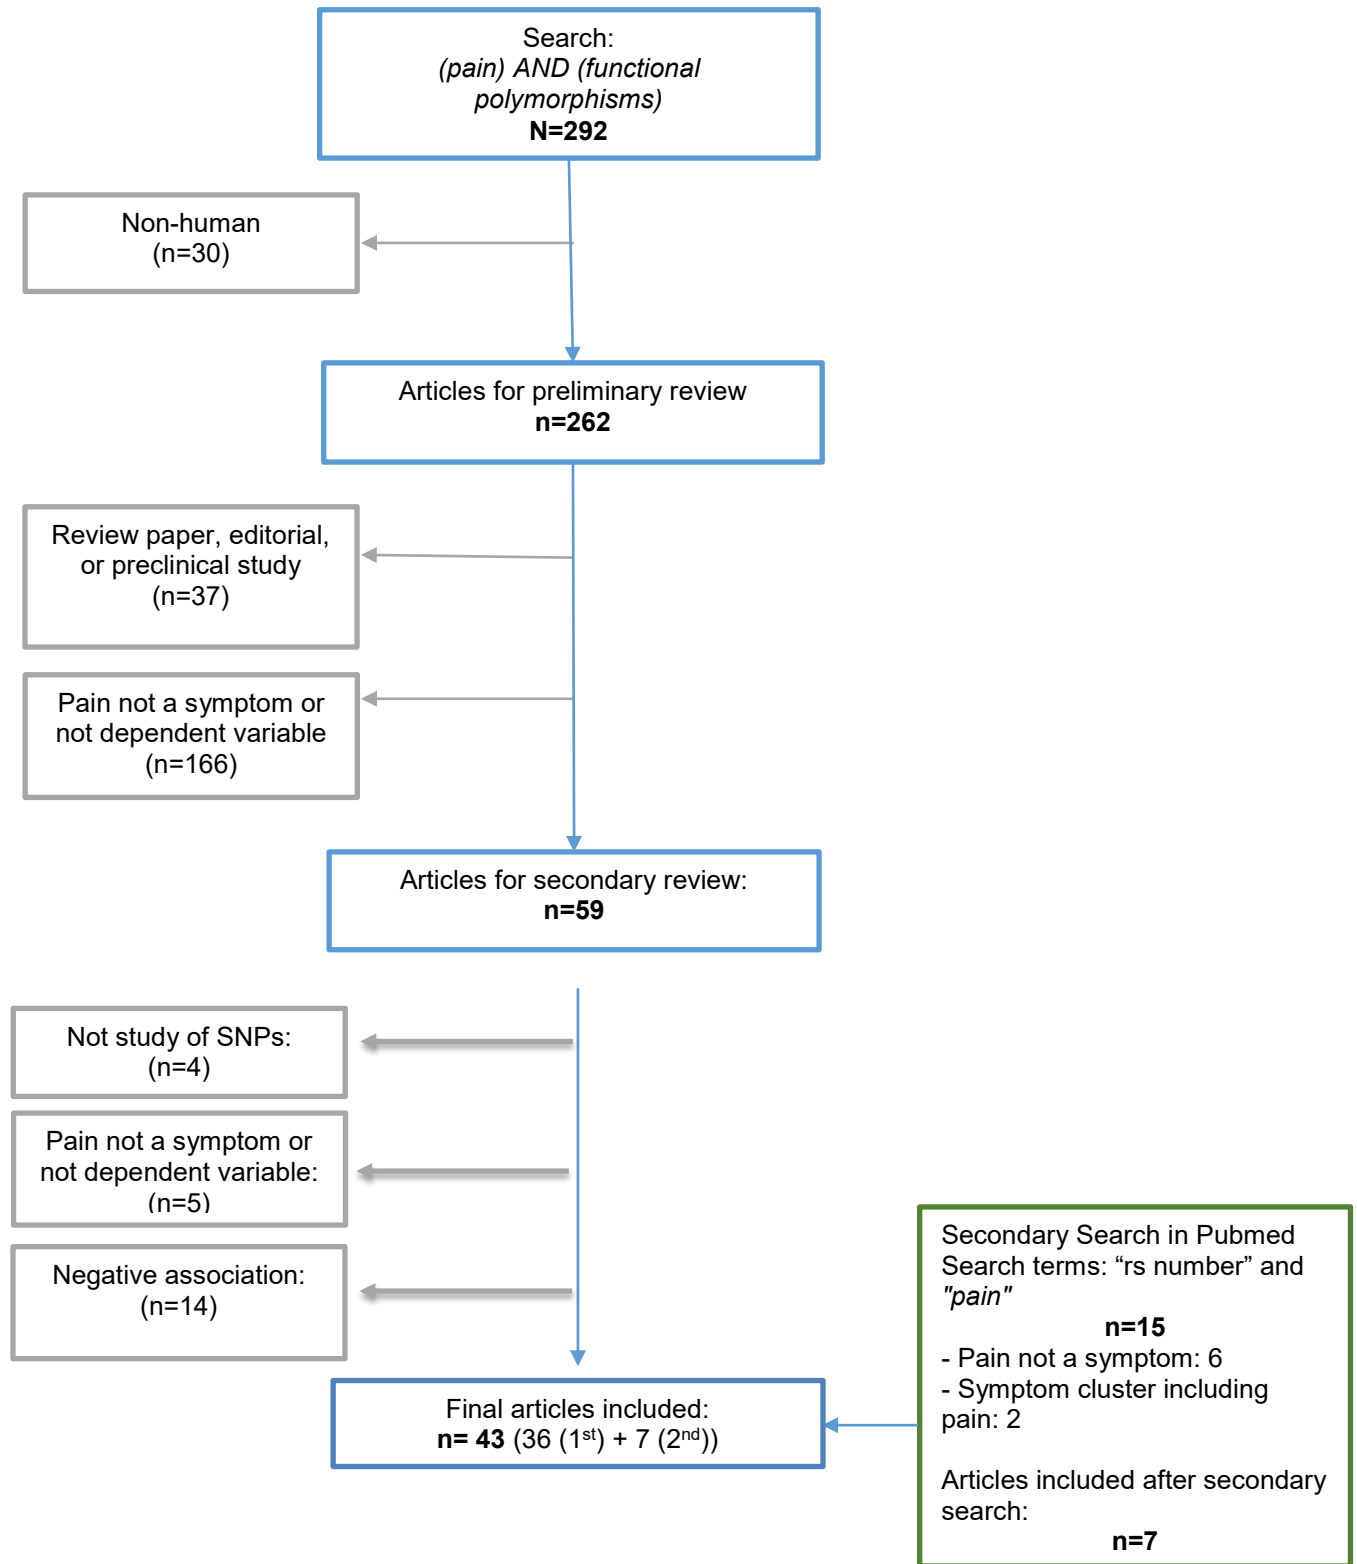

**Notes:** Of 292 English-language studies found using the search terms, 183 were >5 years old; however, all studies regardless of publication date were included. Pain was defined as “an unpleasant sensory and emotional experience associated with actual or potential tissue damage, or described in terms of such

damage” by the International Association for the Study of Pain (IASP) at <https://www.iasp-pain.org/Taxonomy#Pain>.

**Supplemental Table 5. Evidence of Associations between Symptoms of Pain and Genetic Polymorphisms**

| Author, Year, Country       | Gene  | Polymorphism                                                | Pain Symptom Phenotype(s)                                                                                 | Sample                                                                                                                                                            | Relevant Findings                                                                                                                                                                                                                                                                                                                                                                                                                                                                                                                                                                                                                                                                   |
|-----------------------------|-------|-------------------------------------------------------------|-----------------------------------------------------------------------------------------------------------|-------------------------------------------------------------------------------------------------------------------------------------------------------------------|-------------------------------------------------------------------------------------------------------------------------------------------------------------------------------------------------------------------------------------------------------------------------------------------------------------------------------------------------------------------------------------------------------------------------------------------------------------------------------------------------------------------------------------------------------------------------------------------------------------------------------------------------------------------------------------|
| Applebaum et al., 2015, USA | COX-2 | <b>Haplotype</b><br>rs2383515 rs5277<br>rs5275<br>rs2206593 | Severity                                                                                                  | - n=94 patients treated with non-surgical root canal therapy; 43% female; mean age 48 ± 2.2 years; 70% Caucasian                                                  | COX-2 haplotype significantly associated with day 1 worst pain rating following endodontic treatment ( $p=0.025$ )                                                                                                                                                                                                                                                                                                                                                                                                                                                                                                                                                                  |
| Ballina et al., 2013, USA   | OPRM1 | rs1799971                                                   | Pain severity<br>Mean # of regions of moderate or severe pain (defined by a pain score ≥ 4 on a 0-10 NRS) | - n=52 European American women sexual assault (SA) survivors                                                                                                      | Women with ≥1 G alleles at A118G:<br>- had decreased pain severity during the initial 6 weeks after SA ( $p = .002$ ). Significance maintained after adjusting for age, income, education, prior overall pain, and overall pain ( $p=0.0004$ ).<br>- had significantly lower overall pain scores 1 week after SA ( $p=0.002$ ) and 6 weeks after sexual assault ( $p = .018$ ).<br>- Significantly fewer body regions with moderate or severe pain during initial 6 weeks ( $p=0.002$ ).<br>- Significantly lower number of body regions with moderate or severe pain 1 week after SA ( $p=0.002$ ) and 6 weeks after SA ( $p=0.014$ ).<br>- No significant association prior to SA |
| Belfer et al., 2013, USA    | COMT  | rs165599                                                    | Pain sensation<br>Burn sensation<br>Severity                                                              | <u>Cohort 1:</u><br>- n=35 healthy subjects; 87.5% female; 18-45 years old; 75.1% Caucasian<br><u>Cohort 2:</u><br>- n=108 healthy adults; 51.9% female; mean age | rs165599 was associated with the thermal pain ratings to the initial first pulse from the train of 10 pulses delivered at 47°C ( $p=0.02$ ) or 50°C ( $p=0.04$ ).                                                                                                                                                                                                                                                                                                                                                                                                                                                                                                                   |
|                             |       | <b>haplotype</b><br>rs6269<br>rs4633<br>rs4848              |                                                                                                           |                                                                                                                                                                   | - HPS haplotype showed the greatest difference and sensitivity to capsaicin. Effect was significant for females ( $p = 0.04$ & $p=0.02$ ,                                                                                                                                                                                                                                                                                                                                                                                                                                                                                                                                           |

|                             |        |                                                |          |                                                                                                                                                                                                                                                           |                                                                                                                                                                                                                                                                                                                                                                                                                                                                                                                                                                                                                                                                                                                                                                                                                                                                                                                                                |
|-----------------------------|--------|------------------------------------------------|----------|-----------------------------------------------------------------------------------------------------------------------------------------------------------------------------------------------------------------------------------------------------------|------------------------------------------------------------------------------------------------------------------------------------------------------------------------------------------------------------------------------------------------------------------------------------------------------------------------------------------------------------------------------------------------------------------------------------------------------------------------------------------------------------------------------------------------------------------------------------------------------------------------------------------------------------------------------------------------------------------------------------------------------------------------------------------------------------------------------------------------------------------------------------------------------------------------------------------------|
|                             |        | rs4680<br><b>HPS:</b> ACCG<br><b>LPS:</b> GCGG |          | 28.6 ± 8.6 years; 50.9% Caucasian                                                                                                                                                                                                                         | respectively), but not for males ( $p=0.43$ and $0.54$ , respectively).<br>- HPS/LPS haplotype had significantly higher pain ratings than participants with the LPS/LPS haplotype at both $47^{\circ}\text{C}$ ( $p=0.002$ ) and $50^{\circ}\text{C}$ ( $p=0.0006$ ).                                                                                                                                                                                                                                                                                                                                                                                                                                                                                                                                                                                                                                                                          |
| Bondy et al., 1999, Germany | 5-HT2A | rs6313                                         | Severity | - n=168 fibromyalgia patients; 85% female; mean age $53.9 \pm 10.6$ years; 100% Caucasian                                                                                                                                                                 | People with T/T genotype had significantly higher self-reported pain scores ( $p=0.028$ )                                                                                                                                                                                                                                                                                                                                                                                                                                                                                                                                                                                                                                                                                                                                                                                                                                                      |
| Bortsov et al., 2013        | FKBP5  | rs3800373                                      | Severity | <u>Discovery Cohort</u> :<br>- n=949 European Americans who had a motor vehicle collision; 61% female; mean age $36 \pm 13$ years<br><u>Replication Cohort</u> :<br>- n=53 European American women experiencing sexual assault; mean age $27 \pm 8$ years | For the discovery cohort:<br>- the presence of one or more minor alleles 8 SNPs [rs380073 ( $p<0.001$ ), rs7753746 ( $p<0.001$ ), rs3777747 ( $p=0.002$ ), rs4713902 ( $p=0.002$ ), rs9380526 ( $p<0.001$ , rs9394314 ( $p=0.001$ ), rs2817032 ( $p=0.002$ ), rs2817040 ( $p=0.008$ )) predicted neck pain severity six weeks after MVC. Six of these SNPs [rs380073 ( $p=0.003$ ), rs7753746 ( $p=0.001$ ), rs9380526 ( $p<0.001$ ), rs9394314 ( $p=0.003$ ), rs2817032 ( $p=0.006$ ), rs2817040 ( $p=0.004$ )] also predicted overall pain.<br><br>For the replication cohort:<br>- the presence of one or more minor alleles 3 SNPs [rs380073 ( $p=0.035$ ), rs9380526 ( $p<0.001$ , rs9394314 ( $p=0.042$ ), rs2817032 ( $p=0.019$ )) predicted neck pain severity six weeks after sexual assault. 4 SNPs [rs380073 ( $p=0.029$ ), rs9394314 ( $p=0.011$ ), rs2817032 ( $p<0.001$ ), rs2817040 ( $p=0.013$ )] also predicted overall pain. |

|                             |       |           |                              |                                                                                                                                                                                                            |                                                                                                                                                                                                                                                                                                                                                                                                                                                            |
|-----------------------------|-------|-----------|------------------------------|------------------------------------------------------------------------------------------------------------------------------------------------------------------------------------------------------------|------------------------------------------------------------------------------------------------------------------------------------------------------------------------------------------------------------------------------------------------------------------------------------------------------------------------------------------------------------------------------------------------------------------------------------------------------------|
| Camilleri et al., 2009, USA | mtDNA | 3010      | Occurrence (abdominal pain)  | - n=699 patients with/without FGIDs, diarrhea-predominant IBS, or functional diarrhea; predominantly Caucasian                                                                                             | Among those with 7028C, nonspecific abdominal pain (chronic abdominal pain or dyspepsia) was significantly associated with 3010A compared with 3010G (OR=3.3, $p=0.02$ ),                                                                                                                                                                                                                                                                                  |
| Cheng et al., 2010, Taiwan  | OPRM1 | rs1799971 | Occurrence (foot ulcer pain) | - n=65 Taiwanese diabetic foot ulcer patients (DFU)<br>- 2 pain groups: painful DFU (n=15; 26.7% female; mean age $67.5 \pm 16.8$ years) and painless DFU (n=50; 48% female; mean age $65 \pm 11.8$ years) | - Significant difference between genotype frequency between painful DFU and painless DFU groups (OR=0.24; $p=0.38$ )<br>- The distributions of Taiwanese A118G genotypes are significantly different from those of Caucasians ( $p=0.003$ ), pregnant Hispanic women ( $p=0.005$ ), African Americans ( $p<0.001$ ), and European Americans ( $p<0.001$ ).                                                                                                 |
| Dogru et al., 2016, Turkey  | TNF   | rs1800629 | Occurrence                   | - n1=154 female patients with dysmenorrhea; mean age $25.5 \pm 4$ years<br><br>- n2=144 healthy female controls; mean age $26 \pm 4.3$ years                                                               | The genotype and allele frequencies of -308G > A polymorphism showed statistically significant differences between dysmenorrhea patients and controls ( $p = 0.023$ and $p = 0.009$ , respectively). Significant association when the patients were compared with the controls according to the GG genotype versus GA+AA genotypes ( $p = 0.009$ )                                                                                                         |
| Eroglu et al., 2016, Turkey | GSTP1 | rs1695    | Severity                     | - n1=140 women diagnosed with carpal tunnel syndrome (CTS); mean age $46 \pm 11.8$ years<br><br>- n2=97 healthy controls; mean age $30 \pm 4.4$ years<br><br>-All participants were non-working women      | Genotypes were associated with pain severity ratings ( $p \leq 0.015$ ). Subgroup analysis showed CTS patients with the Ile/Val genotype had significantly higher scores on the VAS and Boston SSS than those with the Ile/Ile genotype of GST P1 Ile105Val polymorphism ( $p=0.006$ and $0.017$ , respectively). Patients with the Ile/Val or Val/Val genotypes had significantly higher VAS and Boston SSS scores compared to those of the patients with |

|                               |       |                                             |                                       |                                                                                                                                                                                                      |                                                                                                                                                                                                                                                                                                                                                                   |
|-------------------------------|-------|---------------------------------------------|---------------------------------------|------------------------------------------------------------------------------------------------------------------------------------------------------------------------------------------------------|-------------------------------------------------------------------------------------------------------------------------------------------------------------------------------------------------------------------------------------------------------------------------------------------------------------------------------------------------------------------|
|                               |       |                                             |                                       |                                                                                                                                                                                                      | the Ile/Ile genotype ( $p=0.003$ and $0.004$ , respectively).                                                                                                                                                                                                                                                                                                     |
| Furquim et al., 2016, Brazil  | TNFA  | rs1800629                                   | Occurrence Sensitivity                | - n1=152 patients with Temporomandibular joint disorder (TMD); 89% female; mean age $36.1 \pm 11$ years<br>- n2=91 sex- and age-matched healthy controls; 90% female; mean age $34.7 \pm 11.5$ years | rs1800629 positively associated with TMD. Subjects with TMD had a 2.87 times greater chance of having the GA genotype than did the control group. Homozygotes of minor allele (A) had decreased pain sensitivity for the temporomandibular joint and anterior fascicle of the temporal muscle in the pressure pain threshold test compared with wildtype.         |
| Heimann et al., 2013, Germany | SCN9A | <b>Haplotype</b><br>rs41268673<br>rs6746030 | Pain threshold                        | - n=95 healthy Caucasian participants                                                                                                                                                                | Pain threshold increased with increasing number of wild-type SCN9A haplotype alleles rs41268673C/rs6746030C. The wild-type haplotype rs41268673C/rs6746030C) also modulated the pressure pain threshold (Jonckheeres trend test $p=0.033$ one-sided). Pressure pain thresholds were significantly modulated by the rs41268673A/rs6746030C haplotype ( $p=0.022$ ) |
| Henstrom et al., 2014, Sweden | NPSR1 | rs714588                                    | Occurrence (recurrent abdominal pain) | - n=1774 12-year-old children from the Swedish birth cohort BAMSE                                                                                                                                    | Significantly associated with recurrent abdominal pain (OR: 1.44, $p = 0.033$ )                                                                                                                                                                                                                                                                                   |
|                               |       | rs2530552                                   |                                       |                                                                                                                                                                                                      | Significantly associated with recurrent abdominal pain (OR: 1.47, $p = 0.022$ )                                                                                                                                                                                                                                                                                   |
|                               |       | rs2530566                                   |                                       |                                                                                                                                                                                                      | Significantly associated with recurrent abdominal pain (OR: 1.55, $p = 0.014$ )                                                                                                                                                                                                                                                                                   |
|                               |       | rs963218                                    |                                       |                                                                                                                                                                                                      | Significantly associated with recurrent abdominal pain (OR: 1.49, $p = 0.022$ )                                                                                                                                                                                                                                                                                   |
|                               |       | rs2531840                                   |                                       |                                                                                                                                                                                                      | Significantly associated with recurrent abdominal pain (OR: 1.41, $p = 0.034$ )                                                                                                                                                                                                                                                                                   |

|                                         |        |                                                                       |                                                                                             |                                                                                                                                                                                                                                                  |                                                                                                                                                                                                                     |
|-----------------------------------------|--------|-----------------------------------------------------------------------|---------------------------------------------------------------------------------------------|--------------------------------------------------------------------------------------------------------------------------------------------------------------------------------------------------------------------------------------------------|---------------------------------------------------------------------------------------------------------------------------------------------------------------------------------------------------------------------|
| Herlyn et al.,<br>2010, Germany         | ADRA1A | rs1048101                                                             | Occurrence<br>Severity                                                                      | - n=87 patients with fractures of the distal radius; 96% female- Compared genotypes between those developing complex regional pain syndrome type I (CRPSI; n=15; mean age 62 years) and those that did not (Controls; n=72; mean age 65.6 years) | rs1048101 showed a significant association with the occurrence of CRPS I ( $p = 0.0176$ )                                                                                                                           |
| Hocking et al.,<br>2010, United Kingdom | ADRB2  | rs12654778<br>rs1042713                                               | Occurrence (chronic widespread pain [CWP], non-chronic pain)<br>- Severity<br>- Pain status | - n=7083 individuals from the 1958 British Birth Cohort study; 50.4% female; 100% Caucasian                                                                                                                                                      | rs12654778 and rs1042713 were significantly associated with reduced risk of CWP (recessive minor allele model; $p=0.02$ ). Associated with pain status prior to correction of multiple testing ( $p=0.04$ ).        |
|                                         |        | <b>Haplotype</b><br>rs12654778<br>rs1042713<br>rs1042714<br>rs1800888 |                                                                                             |                                                                                                                                                                                                                                                  | Significantly predicted pain extent ( $p=0.003$ ) and duration ( $p=0.002$ ), and remained significant after correcting for gender, social class, psychological distress, and BMI.                                  |
| Hwang et al.,<br>2014, South Korea      | SLC6A4 | 5-HTTLPR                                                              | Occurrence of Epigastric pain syndrome (EPS)                                                | - n=381 Korean patients (n=112 functional dyspepsia patients; n=269 healthy controls)                                                                                                                                                            | S/S genotype was significantly associated with H. pylori-positive EPS patients (adjusted odds ratio (OR) 0.46; $p = 0.048$ ).                                                                                       |
|                                         | TRPV1  | (945G>C)                                                              |                                                                                             |                                                                                                                                                                                                                                                  | C carrier and C/C genotype was significantly associated with EPS (adjusted OR 0.43; $P = 0.033$ ). After stratification, associations remained in H. pylori-positive EPS patients (adjusted OR 0.28; $P = 0.025$ ). |
| Jacobsen et al.,<br>2012, Norway        | COMT   | rs4680                                                                | Severity                                                                                    | - n1=258 patients with lumbar disc herniation and sciatic pain; 47% female; mean age 41 years                                                                                                                                                    | Significant association between Met/Met genotype and increase in McGill sensory score ( $p=0.017$ ). No clear association between VAS activity score and Met/Met versus Val/Val genotype ( $p=0.13$ ). Significant  |

|                                  |       |               |                                    |                                                                                                                                                                                                              |                                                                                                                                                                                                                                                                    |
|----------------------------------|-------|---------------|------------------------------------|--------------------------------------------------------------------------------------------------------------------------------------------------------------------------------------------------------------|--------------------------------------------------------------------------------------------------------------------------------------------------------------------------------------------------------------------------------------------------------------------|
|                                  |       |               |                                    | - n2=249 pain-free controls matched on age, gender, and smoking status; 48% female; mean age 41 years<br>All subjects European-Caucasian                                                                     | associations between the COMT Met allele and two clinical measures (VAS activity score $p=0.028$ , McGill sensory score $p=0.023$ ) at 6 months after inclusion                                                                                                    |
| Janicki et al., 2006, USA        | OPRM1 | rs1799971     | Severity                           | - n=121 patients with chronic pain and receiving long-term treatment with opioid analgesics<br>- n=101 surgical patients undergoing elective laparoscopic abdominal surgery and opioid naïve (control group) | Frequency of the minor allele was approximately 50% lower in the chronic pain patients when compared to the opioid-naïve acute postoperative group of patients without chronic pain (0.079 vs 0.158, $p=0.009$ ). No significant association between SNP and Pain. |
| Jensen et al., 2009, Sweden      | COMT  | rs4680        | Severity                           | - n=43 healthy subjects; 72% female; mean age 26 years                                                                                                                                                       | No difference in pain ratings at baseline between genotypes. Significant main effect for genotype on repeated measures of pain stimuli ( $p=0.024$ ). Met/met individuals reported significantly more pain compared to val/val ( $p=0.010$ ).                      |
| Kambur et al., 2013, Finland     | COMT  | rs887200      | Severity<br>Pain toleration        | - n=1000 female patients schedule for breast cancer surgery                                                                                                                                                  | Minor allele (C) carriers report significant less cold pain intensity ( $p<0.005$ ).                                                                                                                                                                               |
|                                  |       | rs165774      |                                    |                                                                                                                                                                                                              | Minor allele (A) carriers report significant less heat pain intensity ( $p=0.003$ ).                                                                                                                                                                               |
| Kolesnikov et al., 2013, Estonia | OPRM1 | rs1799971     | Occurrence<br>Severity<br>Duration | - n=102 patients undergoing lower abdominal surgery                                                                                                                                                          | Only chronic postsurgical pain patients carrying at least one copy of the G allele had higher pain intensity than A118A carriers ( $p=0.02$ ).                                                                                                                     |
| Lintermans et al., 2016, Belgium | OPG   | rs2073618 (G) | Severity                           | - n=245 breast cancer patients taking aromatase inhibitor (n=159; mean age 63 years) or                                                                                                                      | Carrying the G allele was associated with severity of musculoskeletal pain ( $p=0.018$ ).                                                                                                                                                                          |



|                              |        |           |                                  |                                                                                                                                                                                                                 |                                                                                                                                                                                                                                                                                                                                                                                                                                                                                        |
|------------------------------|--------|-----------|----------------------------------|-----------------------------------------------------------------------------------------------------------------------------------------------------------------------------------------------------------------|----------------------------------------------------------------------------------------------------------------------------------------------------------------------------------------------------------------------------------------------------------------------------------------------------------------------------------------------------------------------------------------------------------------------------------------------------------------------------------------|
|                              |        |           |                                  | tamoxifen (n=95; mean age 64 years)                                                                                                                                                                             |                                                                                                                                                                                                                                                                                                                                                                                                                                                                                        |
| Liu et al., 2012, Taiwan     | OPRM1  | rs1799971 | Severity                         | - n=96 patients with colon or rectum cancer (n=84) or stomach cancer (n=12) and experiencing oxiliplatin-induced painful neuropathy; 39% female; 70% ≥ 50 years old                                             | Compared with the AA genotype (wild-type), patients with 118G allele variants (AG or GG) significantly reduced response to Ultracet. Pre- and post-treatment VAS scores for patients with G allele variants were 3.1 and 2.6, respectively; patients with AA genotype, pre- and post-treatment VAS scores were 3.0 and 0.9 ( $p<0.001$ ). Patients with G allele variants had a higher percentage of moderate pain (VAS 4-6) after being treated with Ultracet (0 vs 15.2%; $p=0.02$ ) |
| Liu et al., 2014, Taiwan     | TESPA1 | rs2171497 | Severity                         | - n=494 patients with ankylosing spondylitis (AS); 17% female; mean age $28.1 \pm 9.7$ years.<br>- n=478 matched healthy controls; 17% female; mean age $27.3 \pm 8.5$ years.<br>- Both groups were Han Chinese | Significant difference in VAS night pain scores between genotypes ( $p=0.040$ ). Patients with the GG genotype had significantly worse VAS night pain scores than the CC genotype ( $31.49 \pm 18.07$ vs $37.54 \pm 20.65$ , $p=0.030$ ) and CG genotype ( $31.49 \pm 18.07$ vs $35.01 \pm 19.03$ , $p=0.048$ ).                                                                                                                                                                       |
| Lotsch et al., 2009, Germany | COMT   | rs4680    | Sensitivity -cold pain threshold | - n=100 healthy volunteers                                                                                                                                                                                      | After controlling for the confounding FAAH rs4141964 variant, the difference between carriers of the COMT 472AA (n=10) and COMT 472GG (n=7) genotypes became significant ( $p=0.014$ ), with carriers of the variant genotype being less cold pain-sensitive than non-                                                                                                                                                                                                                 |

|                                 |         |                                                                 |                                                 |                                                                                                                                         |                                                                                                                                                                                                                                                                                                                                              |
|---------------------------------|---------|-----------------------------------------------------------------|-------------------------------------------------|-----------------------------------------------------------------------------------------------------------------------------------------|----------------------------------------------------------------------------------------------------------------------------------------------------------------------------------------------------------------------------------------------------------------------------------------------------------------------------------------------|
|                                 |         |                                                                 |                                                 |                                                                                                                                         | carriers. No significant associations were found in the in vivo sample                                                                                                                                                                                                                                                                       |
| Mao et al., 2011, USA           | CYP19A1 | rs60271534                                                      | Occurrence                                      | - n=390 post-menopausal women with breast cancer and receiving an aromatase inhibitor; mean age 61.6 ± 9.9 years; 100% Caucasian.       | Women carrying at least one 8-repeat allele had lower odds of aromatase inhibitor associated arthralgia (adjusted OR=0.41, 95% CI 0.21 to 0.79, $p=0.008$ ) after adjusting for demographic and clinical covariates.                                                                                                                         |
| McCann et al., 2012, USA        | IL1R1   | rs2110726                                                       | Occurrence<br>Frequency<br>Severity<br>Distress | - n=398 women who are undergoing breast cancer surgery                                                                                  | Carriers of the minor allele were less likely to report breast pain prior to surgery ( $p = 0.007$ )                                                                                                                                                                                                                                         |
|                                 | IL13    | rs1295686                                                       |                                                 |                                                                                                                                         | Carriers of the minor allele were more likely to report breast pain prior to surgery ( $p= 0.019$ ).                                                                                                                                                                                                                                         |
| Meloto et al., 2015, USA        | COMT    | rs165774                                                        | Pain Threshold<br>(Pressure pain<br>Heat Pain)  | 2 independent cohorts including 100% Caucasian females:<br>- n=200 temporomandibular disorder (TMD)<br>- n=198 healthy controls         | The minor A allele is associated with lesser pressure pain sensitivity ( $p=0.002$ , $\beta=-1.712$ , $-2.782 <CI < -0.641$ ). The A allele has protective effect against both risk of TMD ( $p=0.014$ , OR=0.81), and pressure pain sensitivity ( $p=0.001$ , $\beta=-0.880$ )                                                              |
| Nissenbaum et al., 2010, Israel | CACNG2  | <b>Haplotype</b><br>rs4820242,<br>rs2284015,<br>rs2284017       | Occurrence                                      | - n=549 Jewish women with breast cancer who had undergone unilateral surgical removal of a breast; mean age 52.9 years; 60.4% Ashkenazi | Homozygous A-C-C haplotype significantly increased susceptibility to pain (OR=1.65, $p= 0.001$ ).                                                                                                                                                                                                                                            |
| Ochroch et al., 2012, USA       | OPRM1   | Haplotype:<br>rs679987 rs606148<br>rs59945 rs613341<br>rs616585 | Severity                                        | - n=90 thoracotomy patients                                                                                                             | Haplotypes containing rs679987, rs606148, rs59945, rs613341, and rs616585 were associated with increased perioperative pain<br>- Significant associations with 4 SNPs in OPRM1 (odds ratio, 95% confidence intervals): rs634479 (0.4, 0.17, 0.97), rs499796 (0.35, 0.13, 0.92), rs548646 (0.47, 0.23, 0.97), and rs679987 (0.1, 0.01, 0.84). |
| Oen et al., 2005, Canada        | IL-6    | rs1800795                                                       | Severity                                        | - n=181 patients with juvenile rheumatoid                                                                                               | Genotype 174G/G was positively correlated with pain [regression                                                                                                                                                                                                                                                                              |

|                               |       |                  |          |                                                                                                                                                                                                                     |                                                                                                                                                                                             |
|-------------------------------|-------|------------------|----------|---------------------------------------------------------------------------------------------------------------------------------------------------------------------------------------------------------------------|---------------------------------------------------------------------------------------------------------------------------------------------------------------------------------------------|
|                               |       |                  |          | arthritis; median age 3.7 years, range 0.3 to 15.8 years; 88.9% Caucasian                                                                                                                                           | coefficient B=0.899, 95% confidence intervals (CI) 0.185, 1.612, $p=0.014$ ].                                                                                                               |
| Omair et al., 2012, Norway    | COMT  | rs4680<br>rs4633 | Severity | - n=93 patients chronic low back pain and lumbar disc degeneration; 62% female; age range 25-60 years                                                                                                               | Association of rs4633 and rs4680 with post treatment improvement in VAS LBP ( $p=0.02$ , and $p=0.02$ , respectively).                                                                      |
| Potvin et al., 2009, Canada   | DRD3  | rs6280           | Severity | - n1=37 Fibromyalgia (FM) patients; 89% female; mean age 50.6 ± 7.4 years.<br>-n2=36 healthy controls; 81% female; mean age 47.9 ± 5.3 years                                                                        | Genotype significantly predicted thermal pain in FM patients= $0.038$ ] but not in controls ( $p=0.505$ ).                                                                                  |
| Rausch et al., 2012, USA      | PTGS2 | rs5277           | Severity | - n=1149 lung cancer survivors enrolled in the May Clinic Lung Cancer Cohort; 47% female; mean age 65.2 ± 9.5 years; 100% Caucasian<br>- Survival subgroups: <3 years (n=440); 3-5 years (n=354); >5 years (n=355). | In 5+ year lung cancer survivors, a SNP (rs5277) was associated with pain: carrying one or more minor (G) alleles reported greater pain scores (95% CI of OR=1.02-1.11).                    |
|                               | TNFA  | rs1799964        |          |                                                                                                                                                                                                                     | In 5+ year lung cancer survivors, a SNP (rs1799964) was associated with pain: carrying one or more minor (G) alleles reported lower pain scores (95% CI of OR=0.92-0.98).                   |
| Reyes-Gibby et al., 2007, USA | IL-8  | rs4073           | Severity | - n=606 patients newly diagnosed with lung cancer; 74% White                                                                                                                                                        | rs4073 genotype (TT, 13%; TA + AA, 87%) significantly associated with severe pain among White patients ( $p=0.04$ ).                                                                        |
| Reyes-Gibby et al., 2009, USA | IL-8  | rs4073           | Severity | - n=156 newly diagnosed patients with pancreas cancer; non-Hispanic White                                                                                                                                           | IL8-251T/A was a predictor for severe pain, with carriers of TT and AT genotypes having more than a threefold risk (OR 3.23, 95% CI 1.4, 4.7) for severe pain relative to the AA genotypes. |

|                                   |           |                                                           |                                    |                                                                                                                                                                                        |                                                                                                                                                                                                                                                                                                                                                                                                                                                                                                 |
|-----------------------------------|-----------|-----------------------------------------------------------|------------------------------------|----------------------------------------------------------------------------------------------------------------------------------------------------------------------------------------|-------------------------------------------------------------------------------------------------------------------------------------------------------------------------------------------------------------------------------------------------------------------------------------------------------------------------------------------------------------------------------------------------------------------------------------------------------------------------------------------------|
| Reyes-Gibby et al., 2009, USA     | TNF-alpha | rs1800629                                                 | Severity                           | - n=667 Caucasian lung cancer patients; 48% female; 48% ≤50 years old                                                                                                                  | Additive model for -308GA (rs1800629) (OR=1.67, 95% CI=1.08,2.58) was predictive of severe pain                                                                                                                                                                                                                                                                                                                                                                                                 |
| Sery et al., 2006, Czech Republic | MAO-B     | A/G polymorphism in intron 13                             | Severity                           | - n=284 patients undergoing tonsillectomy; 63% female; 100% Caucasian                                                                                                                  | Average intensity of postoperative pain in males with the G allele was significantly higher than males with A allele ( $p<0.03$ ).                                                                                                                                                                                                                                                                                                                                                              |
| Solovieva et al., 2004, Finland   | IL-1      | - IL-1RN (G1812–A)<br>- IL-1a(C889–T)<br>- IL-1b(C3954–T) | Occurrence<br>Severity<br>Duration | - n=131 Finnish, middle aged men who are machine drivers, carpenters, or office workers                                                                                                | - Carriers of the IL-1RNA1812 allele had an increased risk of LBP (OR 2.5, 95% CI 1.0–6.0) and in combination with the IL-1aT889 or IL-1bT3954 allele had a higher risk (OR 2.0, 95%CI 0.8-4.9 of and more days with LBP than non-carriers.<br>- Pain intensity was associated with the simultaneous carriage of the IL-1aT889 and IL-1RNA1812 alleles (OR 3.7, 95% CI 1.2–11.9).<br>- Carriers of at least one copy of the IL-1bT3954 allele was associated with the number of days with pain. |
| Stephens et al., 2017, USA        | TNF       | rs1800610                                                 | Occurrence<br>Severity             | - n=410 women who underwent breast cancer surgery<br>- 2 pain subgroups: No pain group (n=126; mean age 58.6 years; 73% White) and mild pain group (n=173; mean age 53.4; 63.7% White) | Patients who were heterozygous or homozygous for the rare T allele (i.e., CC versus CT + TT) were 63% less likely to be in the mild breast pain class ( $p=0.026$ ).                                                                                                                                                                                                                                                                                                                            |
|                                   | IL6       | rs2069840                                                 |                                    |                                                                                                                                                                                        | Rare G allele of rs2069840 decreases the risk for mild persistent breast pain after breast cancer surgery ( $p=0.005$ ).                                                                                                                                                                                                                                                                                                                                                                        |
|                                   | CXCL8     | rs4073                                                    |                                    |                                                                                                                                                                                        | Patients homozygous for the rare A allele (i.e., TT + TA versus AA) were 60% less likely to be in the mild breast pain class ( $p=0.020$ ).                                                                                                                                                                                                                                                                                                                                                     |
| Ulirsch et al., 2014, USA         | FKBP5     | rs2817038                                                 | Severity<br>Interference           | - n=948 European-American individuals within 24 hours after motor vehicle collision; 61% female                                                                                        | After adjustment for individual-level factors, living in more disadvantaged neighborhoods was associated with increased musculoskeletal pain (MSP) ( $p=0.0009$ ) and increased pain interference with daily function                                                                                                                                                                                                                                                                           |

|                                     |       |                   |            |                                                                                                                                                                                                                                   |                                                                                                                                                                                                                                                                                                        |
|-------------------------------------|-------|-------------------|------------|-----------------------------------------------------------------------------------------------------------------------------------------------------------------------------------------------------------------------------------|--------------------------------------------------------------------------------------------------------------------------------------------------------------------------------------------------------------------------------------------------------------------------------------------------------|
|                                     |       |                   |            |                                                                                                                                                                                                                                   | ( $p < 0.0001$ ). The relationship between neighborhood disadvantage and MSP was moderated by SNP rs2817038.                                                                                                                                                                                           |
| Ursu et al., 2014, United Kingdom   | P2RX7 | rs208294          | Severity   | - n=159 patients with diabetic neuropathic pain; 40.2% female; mean age 62.6 years; 100% Caucasian                                                                                                                                | A trend of increased baseline average pain score was detected in female subjects with TT genotype versus the other genotypes ( $p=0.004$ )                                                                                                                                                             |
|                                     |       | rs1718119         |            |                                                                                                                                                                                                                                   | Females with AA genotype had a 1.7 point covariate-adjusted higher mean baseline pain score than females with GG genotype ( $p=0.039$ )                                                                                                                                                                |
| Van Meurs et al., 2009, Netherlands | COMT  | rs4680            | Occurrence | - n=3033 Caucasian older adults with osteoarthritis and living in Rotterdam, The Netherlands; 57% female                                                                                                                          | Carriers of the 158Met variant had an almost 3-fold higher risk ( $p=0.02$ ) of hip pain as compared with carriers of the Val/Val genotype.                                                                                                                                                            |
| Wei et al., 2016, Taiwan            | BDNF  | rs6265 (Val66Met) | severity   | <ul style="list-style-type: none"> <li>- 56 women with primary dysmenorrhea (PDM); mean age <math>23.1 \pm 2.3</math> years</li> <li>- 60 healthy female controls; mean age 23.9 years</li> <li>- Both cohorts Chinese</li> </ul> | Val/Val PDM subjects exhibited state-related negative correlations between pain rating index and PAG-seeded functional connectivity in them PFC (prefrontal cortex), dIPFC (dorsal lateral prefrontal cortex), sensorimotor, secondary somatosensory cortex, and middle temporal gyrus ( $p < 0.05$ ). |
| <b>Symptom cluster</b>              |       |                   |            |                                                                                                                                                                                                                                   |                                                                                                                                                                                                                                                                                                        |

|                         |               |           |                                   |                                                       |                                                                                                                                                                                                                                                                                                                                                     |
|-------------------------|---------------|-----------|-----------------------------------|-------------------------------------------------------|-----------------------------------------------------------------------------------------------------------------------------------------------------------------------------------------------------------------------------------------------------------------------------------------------------------------------------------------------------|
| Illi et al, 2012, USA   | IL4           | rs2243248 | Incidence<br>Severity<br>Distress | - 168 oncology outpatients<br>- 85 family caregivers  | Carrying the minor allele for IL4 rs2243248 (TG+GG) was associated with over a six fold increase in the odds of belonging to the "All high" class (OR: 6.02, 95% CI: 1.874, 19.366, $p=0.003$ ) along with younger age, being White, being a patient (vs a FC), having a lower functional status, and having a higher number of comorbid conditions |
| Doong et al., 2015, USA | IL-6          | rs2069845 |                                   | - n=398<br>- Female<br>- Breast cancer before surgery | rs2069845 significantly associated with latent class membership (OR: 14.22, $p = 0.013$ ) while controlling for age, Karnofsky performance scale, living alone, and ethnicity.                                                                                                                                                                      |
|                         | IL-13         | rs1295686 |                                   |                                                       | rs1295686 significantly associated with latent class membership (OR: 28.53, $p = 0.013$ ) while controlling for age, Karnofsky performance scale, living alone, and ethnicity.                                                                                                                                                                      |
|                         | TNF- $\alpha$ | rs1800610 |                                   |                                                       | rs1800610 significantly associated with latent class membership (OR: 4.97, $p = 0.040$ ) while controlling for age, Karnofsky performance scale, living alone, and ethnicity.                                                                                                                                                                       |

**Abbreviations:**

BPI: Brief Pain Inventory

CRPSI: Complex Regional Pain Syndrome Type 1

CWP: Chronic Widespread Pain

FC: Family Caregiver

FGID: Functional GI Disorders

HPS: High Pain Sensitive

LPS: Low Pain Sensitive

LBP: Low Back Pain

MSP: Musculoskeletal Pain

NRS: Numerical Rating Scale

PAG: Periaqueductal Gray

SA: Sexual Assault

SSS: Symptom Severity Scale

TMD: Temporomandibular Joint Dysfunction

TPT: Thermal Pain Thresholds

VAS: Visual Analog Scale

## References:

- Applebaum, E., Nackley, A. G., Bair, E., Maixner, W., & Khan, A. A. (2015). Genetic variants in cyclooxygenase-2 contribute to post-treatment pain among endodontic patients. *Journal of endodontics*, 41(8), 1214-1218.
- Ballina, L. E., Ulirsch, J. C., Soward, A. C., Rossi, C., Rotolo, S., Linnstaedt, S. D., ... & Holbrook, D. (2013).  $\mu$ -Opioid receptor gene A118G polymorphism predicts pain recovery after sexual assault. *The Journal of Pain*, 14(2), 165-171.
- Belfer, I., Segall, S. K., Lariviere, W. R., Smith, S. B., Dai, F., Slade, G. D., ... & Liu, Q. (2013). Pain modality-and sex-specific effects of COMT genetic functional variants. *PAIN®*, 154(8), 1368-1376.
- Bondy, B., Spaeth, M., Offenbaecher, M., Glatzeder, K., Stratz, T., Schwarz, M., ... & Pongratz, D. E. (1999). The T102C polymorphism of the 5-HT<sub>2A</sub>-receptor gene in fibromyalgia. *Neurobiology of disease*, 6(5), 433-439.
- Bortsov, A. V., Smith, J. E., Diatchenko, L., Soward, A. C., Ulirsch, J. C., Rossi, C., ... & Holbrook, D. (2013). Polymorphisms in the glucocorticoid receptor co-chaperone FKBP5 predict persistent musculoskeletal pain after traumatic stress exposure. *PAIN®*, 154(8), 1419-1426.
- Camilleri, M., Carlson, P., Zinsmeister, A. R., McKinzie, S., Busciglio, I., Burton, D., ... & Boles, R. G. (2009). Mitochondrial DNA and gastrointestinal motor and sensory functions in health and functional gastrointestinal disorders. *American Journal of Physiology-Gastrointestinal and Liver Physiology*, 296(3), G510-G516.
- Cheng, K. I., Lin, S. R., Chang, L. L., Wang, J. Y., & Lai, C. S. (2010). Association of the functional A118G polymorphism of OPRM1 in diabetic patients with foot ulcer pain. *Journal of Diabetes and its Complications*, 24(2), 102-108.
- Dogru, H. Y., Ozsoy, A. Z., Karakus, N., Delibas, I. B., Isguder, C. K., & Yigit, S. (2016). Association of Genetic Polymorphisms in TNF and MIF Gene with the Risk of Primary Dysmenorrhea. *Biochemical genetics*, 54(4), 457-466.
- Doong, S. H., Dhruva, A., Dunn, L. B., West, C., Paul, S. M., Cooper, B. A., ... & Leutwyler, H. (2015). Associations between cytokine genes and a symptom cluster of pain, fatigue, sleep disturbance, and depression in patients prior to breast cancer surgery. *Biological research for nursing*, 17(3), 237-247.
- Eroglu, P., Inal, E. E., Sağ, Ş. Ö., Görükmez, Ö., Topak, A., & Yakut, T. (2016). Associations analysis of GSTM1, T1 and P1 Ile105Val polymorphisms with carpal tunnel syndrome. *Clinical rheumatology*, 35(5), 1245-1251.
- Furquim, B. D. A., Flamengui, L. M. S. P., Repeke, C. E. P., Cavalla, F., Garlet, G. P., & Conti, P. C. R. (2016). Influence of TNF- $\alpha$ -308 G/A gene polymorphism on temporomandibular disorder. *American Journal of Orthodontics and Dentofacial Orthopedics*, 149(5), 692-698.
- Heimann, D., Lötsch, J., Hummel, T., Doehring, A., & Oertel, B. G. (2013). Linkage between increased nociception and olfaction via a SCN9A haplotype. *PLoS One*, 8(7), e68654.
- Henström, M., Zucchelli, M., Söderhäll, C., Bergström, A., Kere, J., Melén, E., ... & D'amato, M. (2014). NPSR1 polymorphisms influence recurrent abdominal pain in children: a population-based study. *Neurogastroenterology & Motility*, 26(10), 1417-1425.
- Herlyn, P., Müller-Hilke, B., Wendt, M., Hecker, M., Mittlmeier, T., & Gradl, G. (2010). Frequencies of polymorphisms in cytokines, neurotransmitters and adrenergic receptors in patients with complex regional pain syndrome type I after distal radial fracture. *The Clinical journal of pain*, 26(3), 175-181.
- Hocking, L. J., Smith, B. H., Jones, G. T., Reid, D. M., Strachan, D. P., & Macfarlane, G. J. (2010). Genetic variation in the beta2-adrenergic receptor but not catecholamine-O-methyltransferase predisposes to chronic pain: results from the 1958 British Birth Cohort Study. *PAIN®*, 149(1), 143-151.
- Hwang, S. W., Kim, N., Jung, H. K., Park, J. H., Choi, Y. J., Kim, H., ... & Jung, H. C. (2014). The association of SLC6A4 5-HTTLPR and TRPV1 945G> C with functional dyspepsia in Korea. *Journal of gastroenterology and hepatology*, 29(10), 1770-1777.
- Illi, J., Miaskowski, C., Cooper, B., Levine, J. D., Dunn, L., West, C., ... & Cataldo, J. (2012). Association between pro-and anti-inflammatory cytokine genes and a symptom cluster of pain, fatigue, sleep disturbance, and depression. *Cytokine*, 58(3), 437-447.
- Jacobsen, L. M., Schistad, E. I., Storesund, A., Pedersen, L. M., Rygh, L. J., Røe, C., & Gjerstad, J. (2012). The COMT rs4680 Met allele contributes to long-lasting low back pain, sciatica and disability after lumbar disc herniation. *European Journal of Pain*, 16(7), 1064-1069.
- Janicki, P. K., Schuler, G., Francis, D., Bohr, A., Gordin, V., Jarzembowski, T., ... & Mets, B. (2006). A genetic association study of the functional A118G polymorphism of the human  $\mu$ -opioid receptor gene in patients with acute and chronic pain. *Anesthesia & Analgesia*, 103(4), 1011-1017.
- Jensen, K. B., Lonsdorf, T. B., Schalling, M., Kosek, E., & Ingvar, M. (2009). Increased sensitivity to thermal pain following a single opiate dose is influenced by the COMT val158met polymorphism. *PLoS one*, 4(6), e6016.
- Kambur, O., Kaunisto, M. A., Tikkanen, E., Leal, S. M., Ripatti, S., & Kalso, E. A. (2013). Effect of catechol-o-methyltransferase-gene (COMT) variants on experimental and acute postoperative pain in 1,000 women undergoing surgery for breast cancer. *The Journal of the American Society of Anesthesiologists*, 119(6), 1422-1433.
- Kolesnikov, Y., Gabovits, B., Levin, A., Veske, A., Qin, L., Dai, F., & Belfer, I. (2013). Chronic pain after lower abdominal surgery: do catechol-O-methyl transferase/opioid receptor  $\mu$ -1 polymorphisms contribute?. *Molecular pain*, 9(1), 19.
- Lintermans, A., Van Asten, K., Jongen, L., Van Brussel, T., Laenen, A., Verhaeghe, J., ... & Neven, P. (2016). Genetic variant in the osteoprotegerin gene is associated with aromatase inhibitor-related musculoskeletal toxicity in breast cancer patients. *European Journal of Cancer*, 56, 31-36.
- Liu, S., Liu, L., Wu, S., Yang, T., Pan, F., Laslett, L., ... & Xu, S. (2014). Lack of association between TESP1 gene polymorphisms (rs1801876, rs2171497, rs4758994, and rs997173) and ankylosing spondylitis in a Chinese population. *Inflammation*, 37(6), 2040-2046.
- Liu, Y. C., & Wang, W. S. (2012). Human mu-opioid receptor gene A118G polymorphism predicts the efficacy of tramadol/acetaminophen combination tablets (ultracet) in oxaliplatin-induced painful neuropathy. *Cancer*, 118(6), 1718-1725.
- Lötsch, J., Flühr, K., Neddermayer, T., Doehring, A., & Geisslinger, G. (2009). The consequence of concomitantly present functional genetic variants for the identification of functional genotype-phenotype associations in pain. *Clinical Pharmacology & Therapeutics*, 85(1), 25-30.
- Mao, J. J., Su, H. I., Feng, R., Donelson, M. L., Aplenc, R., Rebbeck, T. R., ... & DeMichele, A. (2011). Association of functional polymorphisms in CYP19A1 with aromatase inhibitor associated arthralgia in breast cancer survivors. *Breast Cancer Research*, 13(1), R8.
- McCann, B., Miaskowski, C., Koetters, T., Baggott, C., West, C., Levine, J. D., ... & Rugo, H. (2012). Associations between pro-and anti-inflammatory cytokine genes and breast pain in women prior to breast cancer surgery. *The Journal of Pain*, 13(5), 425-437.
- Meloto, C. B., Segall, S. K., Smith, S., Parisien, M., Shabalina, S. A., Rizzatti-Barbosa, C. M., ... & Slade, G. D. (2015). COMT gene locus: new functional variants. *Pain*, 156(10), 2072.
- Nissenbaum, J., Devor, M., Seltzer, Z. E., Gebauer, M., Michaelis, M., Tal, M., ... & Minert, A. (2010). Susceptibility to chronic pain following nerve injury is genetically affected by CACNG2. *Genome research*, 20(9), 1180-1190.
- Ochroch, E. A., Vachani, A., Gottschalk, A., & Kanetsky, P. A. (2012). Natural variation in the  $\mu$ -opioid gene OPRM1 predicts increased pain on third day after thoracotomy. *The Clinical journal of pain*, 28(9), 747-754.
- Oen, K., Malleson, P. N., Cabral, D. A., Rosenberg, A. M., Petty, R. E., Nickerson, P., & Reed, M. (2005). Cytokine genotypes correlate with pain and radiologically defined joint damage in patients with juvenile rheumatoid arthritis. *Rheumatology*, 44(9), 1115-1121.
- Omair, A., Lie, B. A., Reikeras, O., Holden, M., & Brox, J. I. (2012). Genetic contribution of catechol-O-methyltransferase variants in treatment outcome of low back pain: a prospective genetic association study. *BMC musculoskeletal disorders*, 13(1), 76.
- Potvin, S., Larouche, A., Normand, E., de Souza, J. B., Gaumond, I., Grignon, S., & Marchand, S. (2009). DRD3 Ser9Gly polymorphism is related to thermal pain perception and modulation in chronic widespread pain patients and healthy controls. *The Journal of Pain*, 10(9), 969-975.
- Rausch, S. M., Gonzalez, B. D., Clark, M. M., Patten, C., Felten, S., Liu, H., ... & Yang, P. (2012). SNPs in PTGS2 and LTA predict pain and quality of life in long term lung cancer survivors. *Lung cancer*, 77(1), 217-223.
- Reyes-Gibby, C. C., Shete, S., Yennurajalingam, S., Frazier, M., Bruera, E., Kurzrock, R., ... & Spitz, M. R. (2009). Genetic and nongenetic covariates of pain severity in patients with adenocarcinoma of the pancreas: assessing the influence of cytokine genes. *Journal of pain and symptom management*, 38(6), 894-902.
- Reyes-Gibby, C. C., Spitz, M. R., Yennurajalingam, S., Swartz, M., Gu, J., Wu, X., ... & Shete, S. (2009). Role of inflammation gene polymorphisms on pain severity in lung cancer patients. *Cancer Epidemiology and Prevention Biomarkers*, 18(10), 2636-2642.
- Reyes-Gibby, C. C., Spitz, M., Wu, X., Merriman, K., Etzel, C., Bruera, E., ... & Shete, S. (2007). Cytokine genes and pain severity in lung cancer: exploring the influence of TNF- $\alpha$ -308 G/A IL6-174G/C and IL8-251T/A. *Cancer Epidemiology and Prevention Biomarkers*, 16(12), 2745-2751.
- Serý, O., Hrazdilova, O., Didden, W., Klenerová, V., Staif, R., & Znojil, V. (2006). The association of monoamine oxidase B functional polymorphism with postoperative pain intensity. *Neuro Endocrinol Lett*, 27.
- Solovieva, S., Leino-Arjas, P., Saarela, J., Luoma, K., Raininko, R., & Riihimäki, H. (2004). Possible association of interleukin 1 gene locus polymorphisms with low back pain. *Pain*, 109(1), 8-19.
- Stephens, K. E., Levine, J. D., Aouizerat, B. E., Paul, S. M., Abrams, G., Conley, Y. P., & Miaskowski, C. (2017). Associations between genetic and epigenetic variations in cytokine genes and mild persistent breast pain in women following breast cancer surgery. *Cytokine*, 99, 203-213.
- Ulirsch, J. C., Weaver, M. A., Bortsov, A. V., Soward, A. C., Swor, R. A., Peak, D. A., ... & Hendry, P. L. (2014). No man is an island: Living in a disadvantaged neighborhood influences chronic pain development after motor vehicle collision. *PAIN®*, 155(10), 2116-2123.
- Ursu, D., Ebert, P., Langron, E., Ruble, C., Munsie, L., Zou, W., ... & Grubisha, O. (2014). Gain and loss of function of P2X 7 receptors: mechanisms, pharmacology and relevance to diabetic neuropathic pain. *Molecular pain*, 10(1), 37.
- van Meurs, J. B., Uitterlinden, A. G., Stolk, L., Kerkhof, H. J., Hofman, A., Pols, H. A., & Bierma-Zeinstra, S. (2009). A functional polymorphism in the catechol-O-methyltransferase gene is associated with osteoarthritis-related pain. *Arthritis & Rheumatology*, 60(2), 628-629.
- Wei, S. Y., Chao, H. T., Tu, C. H., Lin, M. W., Li, W. C., Low, I., ... & Hsieh, J. C. (2016). The BDNF Val66Met polymorphism is associated with the functional connectivity dynamics of pain modulatory systems in primary dysmenorrhea. *Scientific reports*, 6, 23639.

## Supplemental Figure 6. Positive Affect Search Results



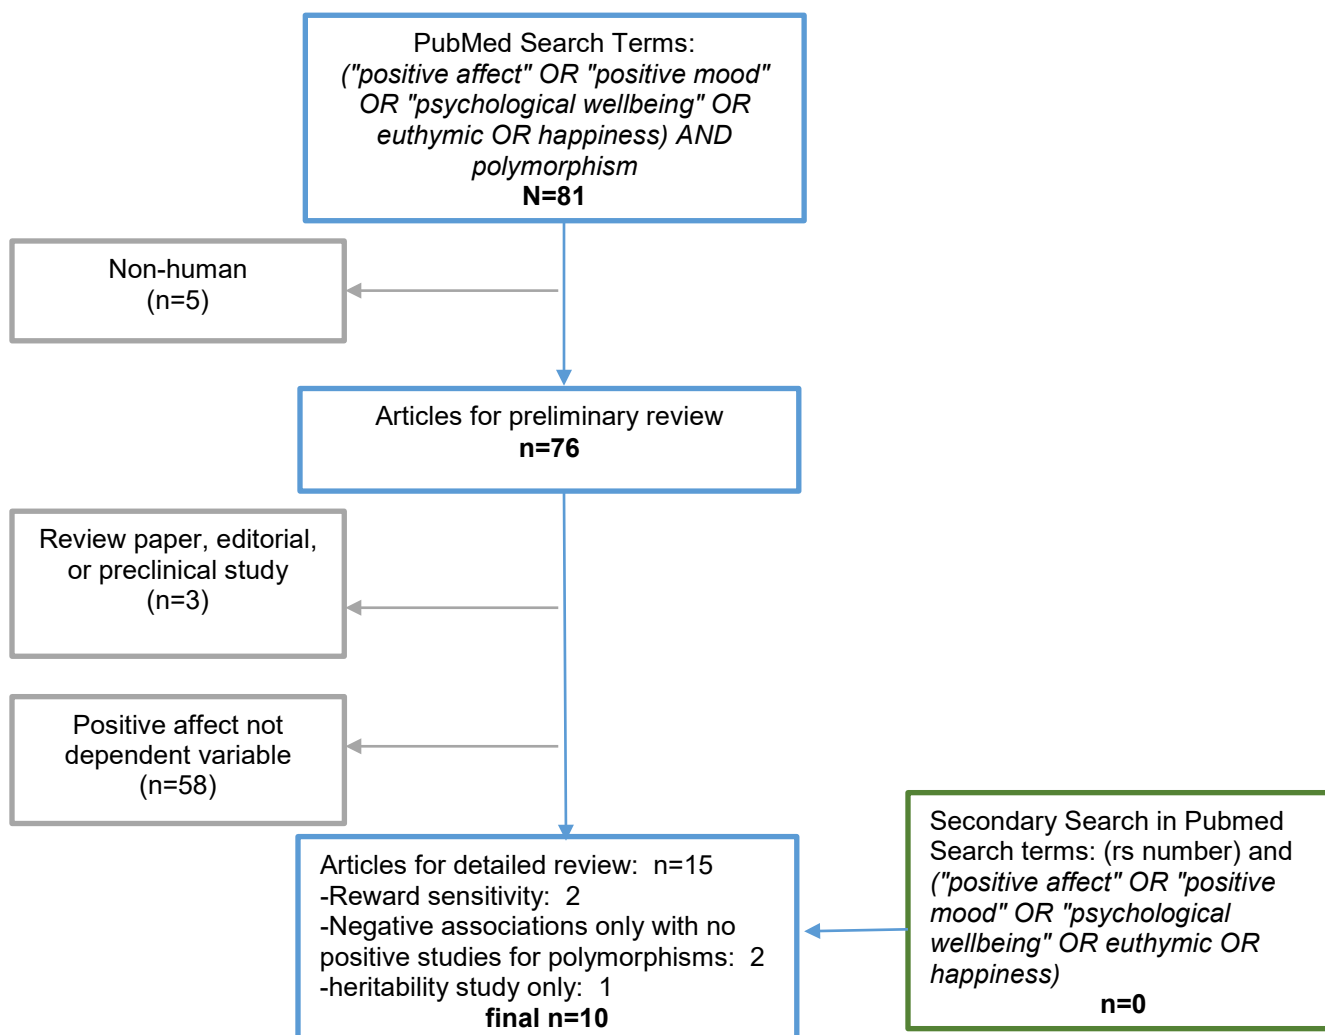

**Symptom Definition:** Positive affect is the opposite of negative affect and depressive symptoms. Synonyms include positive mood, psychological wellbeing, happiness and euthymia. Positive affect does not include pathological extremes, such as mania in bipolar disorder. It does not include reward sensitivity (i.e., pleasure after stimulation). Positive affect is measured using descriptors such as interested, excited, strong, enthusiastic, proud, alert, inspired, determined, attentive, and active (used in the Positive and Negative Affect Schedule instrument). As a National Institute of Nursing Research Common Data Element (CDE), it is conceptualized as “positive affect and wellbeing” and is measured as part of the “affective disturbance” aspect of affective symptoms to be an opposite for depression. Descriptors used in the CDE instrument include sense of well-being, hopeful, satisfying life, purposeful life, meaningful life, cheerful, worth, balance, and interest.

**Methods:** (“positive affect” OR “positive mood” OR “psychological wellbeing” OR euthymic OR happiness) AND polymorphism

**Notes:** Because positive affect had a small number of studies, polymorphism rather than “functional polymorphism” was used for the search. Of 81 English-language studies found using the search terms, 39 were <5 years old; however, all studies regardless of publication date were included in the flow chart above because of the small number. Two studies defined positive affect differently than the other studies, focusing on reward sensitivity, so they were not included. The studies with only negative associations included polymorphisms in DNMT1, DNMT3A, DNMT3B, MTHFR, KSR2, RAPGEF6, and LOC105377703; because no other studies showed positive associations for these genes, the articles were not included. One study estimated heritability but did not report on any specific polymorphisms, so it was not included. Happiness is closely related to positive affect. Its inclusion in the search argues for including synonymous search terms such as contentment. A search for (happiness OR contentment) AND polymorphism yielded no additional articles.

**Supplemental Table 6. Evidence of Associations between Positive Affect and Genetic Polymorphisms**

| Author, Year, Country                | Gene                           | Polymorphism                                                         | Positive Affect Phenotype(s) | Sample                                                                                                                                                         | Relevant Findings                                                                                                                                                                                           |
|--------------------------------------|--------------------------------|----------------------------------------------------------------------|------------------------------|----------------------------------------------------------------------------------------------------------------------------------------------------------------|-------------------------------------------------------------------------------------------------------------------------------------------------------------------------------------------------------------|
| Bakker et al., 2014, Netherlands     | BDNF<br>CHRM2<br>DRD4<br>OPRM1 | rs11030101<br>rs1824024<br>rs936461<br>rs495491<br>rs609148/rs648893 | severity                     | n = 126 Dutch participants with previous depression with residual symptoms                                                                                     | PA did not differ by genotype before intervention; CHRM2 and OPRM1 variants increased PA for intervention ( $p < .01$ ); BDNF and DRD4 variants maintained PA for intervention ( $p < .01$ )                |
| De Neve et al., 2011, United Kingdom | SLC6A4                         | short (S) or long (L) degenerative VNTR                              | severity                     | n = 2574 young adults from the National Longitudinal Study of Adolescent Health                                                                                | L/L more likely to be satisfied with life than S/S ( $p < .05$ )                                                                                                                                            |
| Finan et al., 2010, USA              | COMT<br><br>OPRM1              | rs4680 (val158met)<br><br>rs1799971 (asn40asp)                       | severity                     | n = 46 females with fibromyalgia; mean age $53 \pm 7.8$ years; 93% Caucasian                                                                                   | PA did not differ overall by genotype; COMT met/met had decreased PA on high pain days ( $p < .05$ ); OPRM1 asp carriers had steeper decline in PA on high pain days but increased PA overall ( $p < .05$ ) |
| Hartmann et al., 2014, Netherlands   | SLC6A4                         | short (S) or long (L) degenerative VNTR; rs25531<br>rs25532          | severity                     | n = 361 Belgian female monozygotic twins; mean age $28 \pm 7.5$ years                                                                                          | Association between sleep quality and PA was stronger in carriers of at least one copy of the S allele ( $p < .05$ )                                                                                        |
| Liu et al., 2017, China              | COMT                           | rs4680 (val158met)                                                   | severity                     | n = 445 Chinese Han students; 75% female; mean age $24.3 \pm 1.5$ years                                                                                        | Met allele associated with decreased PA ( $p = 0.019$ )                                                                                                                                                     |
| Lucht et al., 2009, Germany          | OXTR                           | rs53576                                                              | severity                     | n = 289 German adults                                                                                                                                          | Decreased PA in males homozygous for A allele ( $p < .001$ )                                                                                                                                                |
| Matsunaga et al., 2014, Japan        | CNR1                           | rs806377                                                             | severity                     | n = 198 healthy Japanese students; 62% female; mean age $23.2 \pm 0.4$ years                                                                                   | Increased happiness for C allele carriers ( $p < .05$ ); increased positive mood for C allele carriers after intervention ( $p < .05$ )                                                                     |
| Moons et al., 2014, USA              | OXTR                           | rs53576                                                              | severity                     | n = 172 students and staff affiliated with the University of California, Los Angeles; 60% female; mean age 21 years; 37% Asian American, 23% European American | No overall relationship between variant and PA; GG genotype associated with higher post social-stress PA in women with high levels of oxytocin                                                              |
| van Roekel et al., 2016, Netherlands | SLC6A4                         | short (S) or long (L) degenerative VNTR                              | severity                     | n = 269 adolescents; 58.4% female; mean age 14.2 years                                                                                                         | S allele carriers had lower positive affect with poorer sleep ( $p = 0.018$ )                                                                                                                               |
| Wingo et al., 2017, USA              | LINC01221                      | rs322931                                                             | severity                     | n = 2522 African American adults in the Grady Trauma Project; 69% female; mean age $39.2 \pm 13.7$ years                                                       | Minor allele significantly associated with greater PA ( $p < .001$ )                                                                                                                                        |

**Abbreviations:** PA: Positive affect; VNTR: Variable Number Tandem Repeat

**References:**

- Bakker, J. M., Lieveise, R., Menne-Lothmann, C., Viechtbauer, W., Pishva, E., Kenis, G., . . . Wichers, M. (2014). Therapygenetics in mindfulness-based cognitive therapy: Do genes have an impact on therapy-induced change in real-life positive affective experiences? *Translational Psychiatry*, 4, e384. doi:10.1038/tp.2014.23
- De Neve, J. E. (2011). Functional polymorphism (5-HTTLPR) in the serotonin transporter gene is associated with subjective well-being: Evidence from a US nationally representative sample. *Journal of Human Genetics*, 56(6), 456-459. doi:10.1038/jhg.2011.39
- Finan, P. H., Zautra, A. J., Davis, M. C., Lemery-Chalfant, K., Covault, J., & Tennen, H. (2010). Genetic influences on the dynamics of pain and affect in fibromyalgia. *Health Psychology*, 29(2), 134-142. doi:10.1037/a0018647
- Hartmann, J. A., Wichers, M., van Bemmell, A. L., Derom, C., Thiery, E., Jacobs, N., . . . Simons, C. J. (2014). The serotonin transporter 5-HTTLPR polymorphism in the association between sleep quality and affect. *European Neuropsychopharmacology*, 24(7), 1086-1090. doi:10.1016/j.euroneuro.2014.01.015
- Liu, J., Gong, P., Gao, X., & Zhou, X. (2017). The association between well-being and the COMT gene: Dispositional gratitude and forgiveness as mediators. *Journal of Affective Disorders*, 214, 115-121. doi:10.1016/j.jad.2017.03.005
- Lucht, M. J., Barnow, S., Sonnenfeld, C., Rosenberger, A., Grabe, H. J., Schroeder, W., . . . Roszkopf, D. (2009). Associations between the oxytocin receptor gene (OXTR) and affect, loneliness and intelligence in normal subjects. *Progress in Neuro-Psychopharmacology & Biological Psychiatry*, 33(5), 860-866. doi:10.1016/j.pnpbp.2009.04.004
- Matsunaga, M., Isowa, T., Yamakawa, K., Fukuyama, S., Shinoda, J., Yamada, J., & Ohira, H. (2014). Genetic variations in the human cannabinoid receptor gene are associated with happiness. *PLoS One*, 9(4), e93771. doi:10.1371/journal.pone.0093771
- Moons, W. G., Way, B. M., & Taylor, S. E. (2014). Oxytocin and vasopressin receptor polymorphisms interact with circulating neuropeptides to predict human emotional reactions to stress. *Emotion*, 14(3), 562-572. doi:10.1037/a0035503
- van Roekel, E., Hartmann, J. A., Wichers, M., & Verhagen, M. (2016). The 5-HTTLPR genotype moderates the association between sleep quality and positive affect: A replication study. *European Neuropsychopharmacology*, 26(8), 1350-1351. doi:10.1016/j.euroneuro.2016.06.001
- Wingo, A. P., Almlil, L. M., Stevens, J. S., Jovanovic, T., Wingo, T. S., Tharp, G., . . . Ressler, K. J. (2017). Genome-wide association study of positive emotion identifies a genetic variant and a role for microRNAs. *Molecular Psychiatry*, 22(5), 774-783. doi:10.1038/mp.2016.143

**Supplemental Figure 7. Sleep Disturbance Search Results**

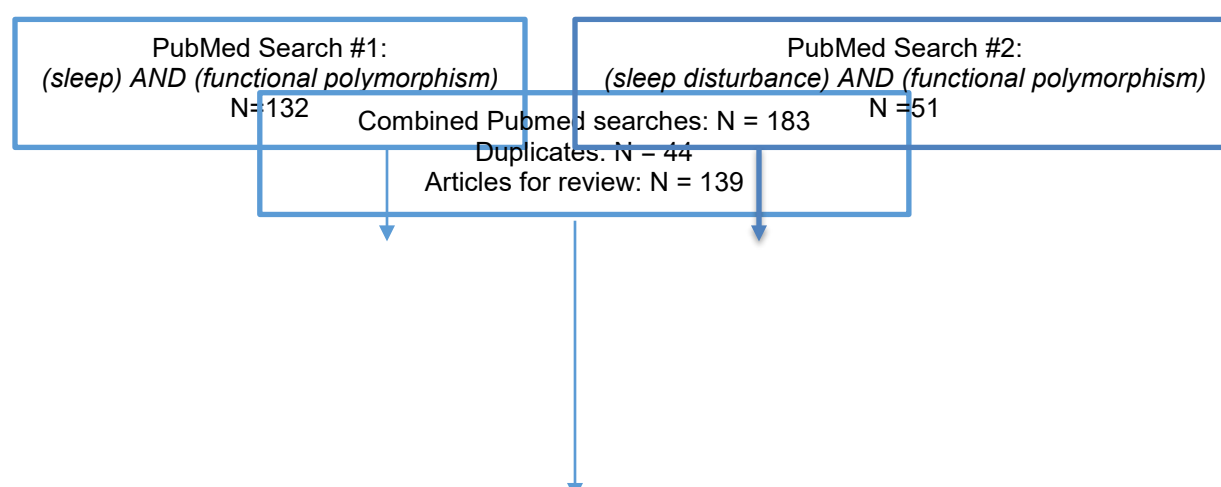

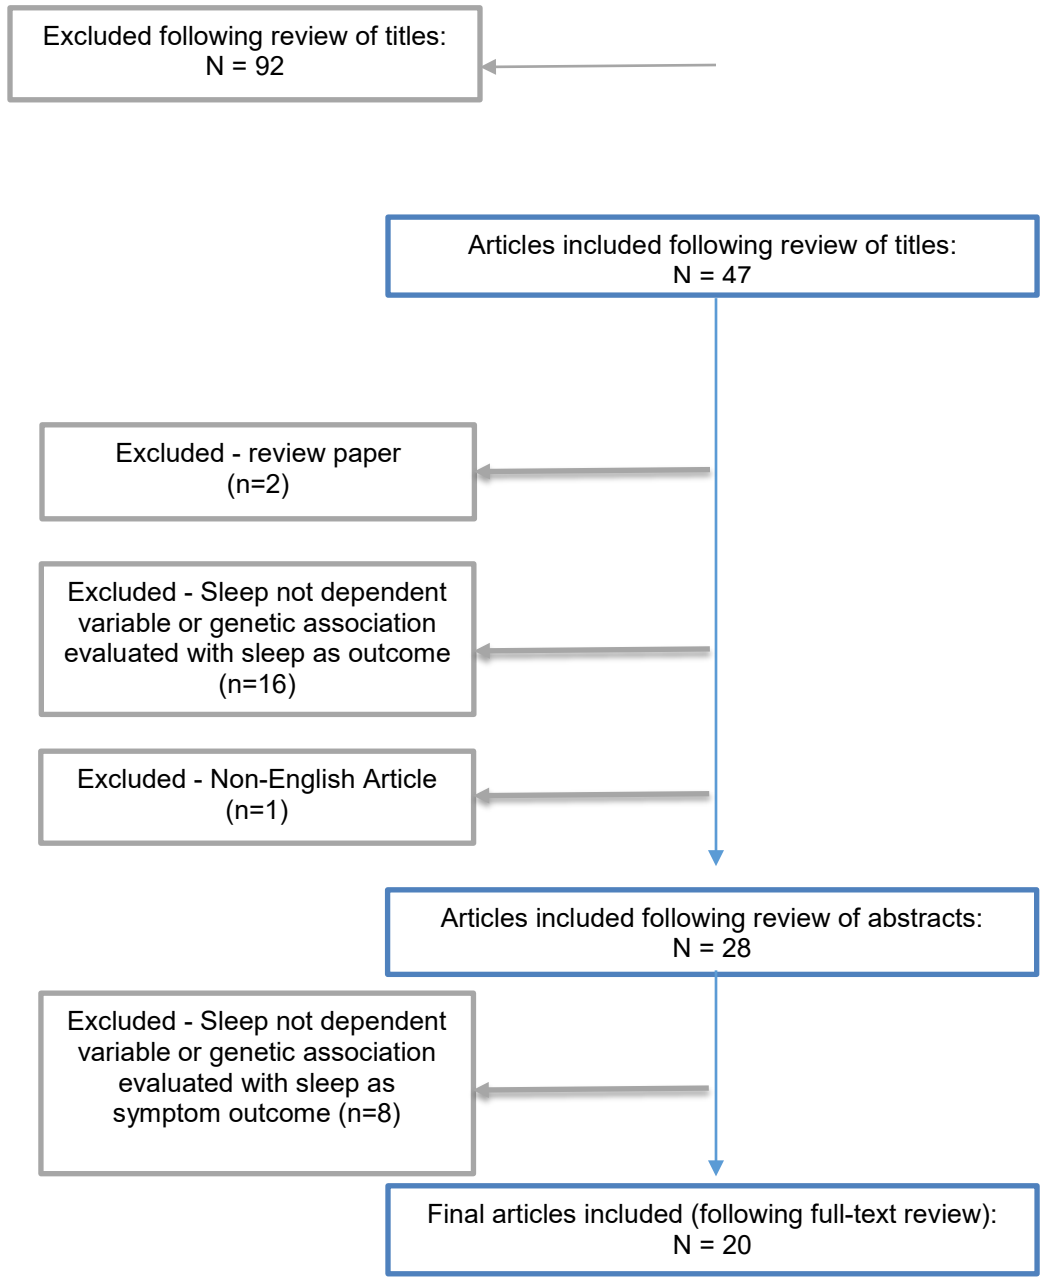

**Supplemental Table 7. Evidence of Associations between Sleep Disturbance and Genetic Polymorphisms**

| Author, Year, Country              | Gene                            | Polymorphism                                                                     | Phenotype(s)                                           | Sample                                                                                                                                                                            | Relevant Findings                                                                                                                                                                                                                                                                                                                                                                                                                                                                                                                                                                                                              |
|------------------------------------|---------------------------------|----------------------------------------------------------------------------------|--------------------------------------------------------|-----------------------------------------------------------------------------------------------------------------------------------------------------------------------------------|--------------------------------------------------------------------------------------------------------------------------------------------------------------------------------------------------------------------------------------------------------------------------------------------------------------------------------------------------------------------------------------------------------------------------------------------------------------------------------------------------------------------------------------------------------------------------------------------------------------------------------|
| Alfaro et al., 2014, USA           | IL1R2<br><br>IL-13<br><br>NFKB2 | Haplotype A2:<br>rs11674595[T]<br>rs7570441[A]<br><br>rs1800925<br><br>rs1056890 | Sleep disturbance                                      | - n = 398 women who underwent breast cancer surgery on one breast.                                                                                                                | IL1R2 haplotype A2: Each additional dose of haplotype was associated with a 2.08-fold increase in the odds of belonging to the high sustained sleep disturbance class ( $p=.024$ ).<br>IL13 rs1800925: carrying one or two doses of the rare T allele (i.e., CC versus CT+TT) was associated with a 2.21-fold increase in the odds of belonging to the high sustained sleep disturbance class ( $p=.005$ ).<br>NFKB2 rs1056890: carrying one or two doses of the rare T allele (i.e., CC versus CT+TT) was associated with a 47% decrease in the odds of belonging to the high sustained sleep disturbance class ( $p=.028$ ). |
| Amin et al., 2016, Netherlands     | RBFOX3                          | rs9900428<br>rs9907432<br>rs7211029                                              | Sleep latency                                          | - meta-analysis<br>- Discovery cohort: n = 4,242 subjects with European ancestry<br>- Replication cohort: 12 independent cohorts (n = 30,377)                                     | Variants (rs9900428, rs9907432 and rs7211029) were associated with sleep latency. Replicated findings in 12 independent populations (n = 30,377).                                                                                                                                                                                                                                                                                                                                                                                                                                                                              |
| Aouizerat et al., 2009, USA        | TNFA                            | rs1800629                                                                        | Sleep disturbance                                      | - N = 253 (168 patients with breast, prostate, lung and brain cancers; 85 family caregivers)<br>- 53.8% female; mean age 61.4 ± 11.3 years; 74.6% White                           | Association with overall ratings of sleep disturbance and fatigue, and trajectories of these symptoms. Common allele homozygotes reported higher levels of sleep disturbance ( $p = .09$ ) and morning fatigue ( $p = .02$ ) than minor allele carriers.                                                                                                                                                                                                                                                                                                                                                                       |
| Bachmann et al., 2012, Switzerland | ADA                             | rs73598374                                                                       | Subjective sleepiness in response to sleep deprivation | Laboratory subgroup undergoing sleep deprivation:<br>- n = 22 healthy volunteers prospectively matched by genotype (G/A and G/G – 11 people per genotype); mean age 24 years; 48% | Those with G/A genotypes reported significantly higher subjective sleepiness than those with the G/G genotypes during sleep deprivation ( $p<0.02$ ).                                                                                                                                                                                                                                                                                                                                                                                                                                                                          |

|                                      |                       |                                      |                                             |                                                                                                                                                                                                                                                                                                                                                      |                                                                                                                                                                                                                                                                                                                  |
|--------------------------------------|-----------------------|--------------------------------------|---------------------------------------------|------------------------------------------------------------------------------------------------------------------------------------------------------------------------------------------------------------------------------------------------------------------------------------------------------------------------------------------------------|------------------------------------------------------------------------------------------------------------------------------------------------------------------------------------------------------------------------------------------------------------------------------------------------------------------|
|                                      |                       |                                      |                                             | female; all Swiss or German                                                                                                                                                                                                                                                                                                                          |                                                                                                                                                                                                                                                                                                                  |
| Bachmann et al., 2012, Switzerland   | BDNF                  | rs6265                               | subjective sleepiness                       | <ul style="list-style-type: none"> <li>- N = 22 healthy volunteers equally representing 2 genotypes (i.e., val/val, val/met); 36% female; mean age 24 years</li> <li>- volunteers matched on age, sex, BMI, diurnal preference, ESS score, trait anxiety, and consumption of alcohol and caffeine</li> <li>- 4 nights in sleep laboratory</li> </ul> | No differences in sleepiness between genotype groups. Val/val group had greater deep stage 4 sleep and NREM sleep intensity than val/met genotype.                                                                                                                                                               |
| Barclay et al., 2011, United Kingdom | SLC6A4                | 5HTTLPR (rs25531)                    | Sleep quality<br>Diurnal preference         | <ul style="list-style-type: none"> <li>- N = 947 G1219 and G1219T twins longitudinal studies; 61.8% female; mean age 20.3 ± 1.8 years</li> </ul>                                                                                                                                                                                                     | Significant main effect of 5HTTLPR on sleep quality; L/L genotype associated with significantly poorer sleep quality (mean=6.35, SD=3.36) than carriers of at least one S allele (mean=5.67, SD=2.96; b= 0.34, p=0.005). No associations between PERIOD3 and CLOCK genes on sleep quality or diurnal preference. |
| Craig et al., 2006, United Kingdom   | MAO-A                 | 30 bp VNTR                           | Sleep disturbance                           | <ul style="list-style-type: none"> <li>- N = 405 patients with Alzheimer's disease; 31% female; mean age 78 years</li> </ul>                                                                                                                                                                                                                         | MAO-A allele 4 associated with increased susceptibility to sleep disturbance (p = .008).                                                                                                                                                                                                                         |
| Doong et al., 2015, USA              | IL-6<br>IL-13<br>TNFA | rs2069845<br>rs1295686<br>rs18800610 | Symptom cluster including sleep disturbance | <ul style="list-style-type: none"> <li>- N = 398 women prior to breast cancer surgery</li> <li>- Using LCPA, three distinct classes of patients were identified based on their experiences with the symptoms of pain, fatigue, sleep disturbance, and depression</li> </ul>                                                                          | Significant associations identified between rs2069845, rs1295686, and rs18800610 and latent class membership.                                                                                                                                                                                                    |
| Geoffroy et al., 2014, France        | ASMT                  | rs4446909                            | Sleep quality                               | <ul style="list-style-type: none"> <li>- N = 53 Caucasian adult subjects (n = 25 euthymic patients with bipolar</li> </ul>                                                                                                                                                                                                                           | No association was observed between rs4446909 genotype and sleep quality (p = 0.37).                                                                                                                                                                                                                             |

|                                    |        |                                                  |                                                                        |                                                                                                                                                                                                                                                                 |                                                                                                                                                                                                                                                                                                 |
|------------------------------------|--------|--------------------------------------------------|------------------------------------------------------------------------|-----------------------------------------------------------------------------------------------------------------------------------------------------------------------------------------------------------------------------------------------------------------|-------------------------------------------------------------------------------------------------------------------------------------------------------------------------------------------------------------------------------------------------------------------------------------------------|
|                                    |        |                                                  |                                                                        | disorder in remission and n = 28 healthy subjects)                                                                                                                                                                                                              |                                                                                                                                                                                                                                                                                                 |
| Gottlieb et al., 2015, USA         | CBWD2  | rs1191685<br>rs1823125<br>rs1807282<br>rs1964463 | Sleep duration                                                         | - CHARGE Consortium GWAS<br>- 18 population-based cohorts consisting of n = 47,180 individuals from European ancestry<br>- Replication cohort: n = 4,771 African American individuals                                                                           | CBWD2 polymorphisms associated with self-reported usual sleep duration. Association replicated in African American sample.                                                                                                                                                                      |
| Hartmann et al., 2014, Netherlands | SLC6A4 | 5-HTTLPR (rs25531)                               | Sleep quality                                                          | - n = 361 Belgian adult female monozygotic twins; mean age 28 ± 7.5 years; 100% White                                                                                                                                                                           | Significant interaction between sleep quality and genotype in predicting positive affect the next day: carriers of one (n=167) or two S-alleles (n=78) had a significantly steeper slope compared to LL carriers (n=116) ( $\chi^2=4.16$ , $p=.042$ and $\chi^2=3.90$ , $p=.048$ respectively). |
| Illi et al., 2012                  | IL4    | rs2243248                                        | Symptom cluster including sleep disturbance                            | - N = 253 (i.e., 168 oncology outpatients and 85 family caregivers; 53.8% female<br>- latent class profile analysis was used to identify distinct classes of symptom reports: Low Depression/Low Pain class; High Depression/Low Pain class; and All High class | rs2243248 associated with membership to the “all high” symptom class, controlling for age, being White, being a patient versus a caregiver, having functional status score, and having more comorbidities.                                                                                      |
| Jimenez et al., 2017, Colombia     | COMT   | rs4680                                           | Sleep quality (i.e., satisfaction with sleep, insomnia, & hypersomnia) | - n = 270 university student in medical or nursing schools in Bogota, Colombia; 75.1% female; mean age 21.3 ± 3.8 years                                                                                                                                         | Met carriers (Val/Met or Met/Met genotypes) had higher scores for hypersomnia ( $p = 0.001$ ) and lower scores for mental health-related quality of life ( $p = 0.007$ ), remained significant after correcting for multiple testing.                                                           |
| Maire et al., 2015, Switzerland    | PER3   | VNTR                                             | Sleep quality, daytime sleepiness                                      | - n = 28 healthy volunteers; 50% female; mean age 24.9 ± 3.3 years                                                                                                                                                                                              | No differences between PER3 genotypes and mean scores for Pittsburgh Sleep Quality Index or Epworth Sleepiness Scale at baseline.                                                                                                                                                               |

|                                  |        |                                       |                                                                                         |                                                                                                          |                                                                                                                                                                                                                                                                                                                                                         |
|----------------------------------|--------|---------------------------------------|-----------------------------------------------------------------------------------------|----------------------------------------------------------------------------------------------------------|---------------------------------------------------------------------------------------------------------------------------------------------------------------------------------------------------------------------------------------------------------------------------------------------------------------------------------------------------------|
| Mansour et al., 2017, USA        | PER3   | rs1012477<br>rs10462021<br>rs11579477 | Sleep quality                                                                           | - n = 274 older adults;<br>64% female; mean age<br>73.4 ± 7.2 years                                      | No significant associations between reports of sleep quality (e.g., sleep time, sleep latency) and polymorphisms; however nominally significant associations between rs1012477 and total CS score ( $p = 0.035$ ); rs10462021 and rs1012477 and SRM ( $p = 0.017$ ); rs228642 with total sleep time ( $p = 0.009$ ); rs1012477 with sleep latency (SL). |
| Miaskowski et al., 2010, USA     | IL-6   | rs4719714                             | Sleep disturbance                                                                       | - N = 288 (168 oncology outpatients and 85 family caregivers); 53.8% female; mean age 61.4 ± 11.3 years  | Common allele homozygotes reported higher levels of sleep disturbance than minor allele carriers ( $p = 0.003$ ).                                                                                                                                                                                                                                       |
| Ojeda et al., 2014, Colombia     | MAOA   | VNTR                                  | Daytime sleepiness                                                                      | - n = 210 university students living in Bogota, Colombia; 70% female; mean age 20.8 ± 2.7 years.         | VNTR showed significant association with Epworth Sleepiness Scale (ESS) scores ( $p = 0.01$ ): 3/3 genotype carriers had the lowest scores.                                                                                                                                                                                                             |
| Perea et al., 2014, Colombia     | PER3   | rs57875989                            | Daytime sleepiness                                                                      | - n = 294 healthy undergraduate university students in Colombia; 66.6% Female; mean age 20.5 ± 2.7 years | No significant associations.                                                                                                                                                                                                                                                                                                                            |
| Reitey et al., 2005, Switzerland | ADA    | rs73598374                            | Sleep quality                                                                           | N = 4,329; 47% female                                                                                    | No significant differences between genotype groups and scores for sleep time, efficiency, latency, or wakefulness after sleep onset (all $p$ 's > 0.05).                                                                                                                                                                                                |
| Spada et al., 2014, Germany      | NPSR-1 | rs324981                              | Sleep quality (sleep duration, rest duration, sleep onset, rest onset, & sleep latency) | N = 393 elderly subjects; 45% female; mean age 70.5 years ± 3.6 years; 100% White                        | Those with the homozygous T/T genotype had a significantly shorter sleep- and rest duration compared to subjects carrying the A-allele.                                                                                                                                                                                                                 |

**Abbreviations:** Bipolar Disorder (BD); Composite Scale of Morningness (CSM); Epworth Sleepiness Scale (ESS); Family Caregivers (FC); General Sleep Disturbance Scale (GSDS); Karolinska Sleepiness Scale (KSS); Lee Fatigue Scale (LFS); Morningness-Eveningness Questionnaire (MEQ); Munich Chronotype Questionnaire (MCTQ); Neuropsychiatric Inventory with Caregiver Distress (NPI-D); Pittsburgh Sleep Quality Index (PSQI); Polysomnography (PSG); Stanford Sleepiness Scale (SSS); Working Memory (WM)

**References:**

- Alfaro, E., Dhruva, A., Langford, D. J., Koettters, T., Merriman, J. D., West, C., . . . Miaskowski, C. (2014). Associations between cytokine gene variations and self-reported sleep disturbance in women following breast cancer surgery. *Eur J Oncol Nurs*, *18*(1), 85-93. doi:10.1016/j.ejon.2013.08.004
- Amin, N., Allebrandt, K. V., van der Spek, A., Muller-Myhsok, B., Hek, K., Teder-Laving, M., . . . van Duijn, C. M. (2016). Genetic variants in RFX3 are associated with sleep latency. *Eur J Hum Genet*, *24*(10), 1488-1495. doi:10.1038/ejhg.2016.31
- Aouizerat, B. E., Dodd, M., Lee, K., West, C., Paul, S. M., Cooper, B. A., . . . Miaskowski, C. (2009). Preliminary evidence of a genetic association between tumor necrosis factor alpha and the severity of sleep disturbance and morning fatigue. *Biol Res Nurs*, *11*(1), 27-41. doi:10.1177/1099800409333871
- Bachmann, V., Klaus, F., Bodenmann, S., Schafer, N., Brugger, P., Huber, S., . . . Landolt, H. P. (2012). Functional ADA polymorphism increases sleep depth and reduces vigilant attention in humans. *Cereb Cortex*, *22*(4), 962-970. doi:10.1093/cercor/bhr173
- Bachmann, V., Klein, C., Bodenmann, S., Schafer, N., Berger, W., Brugger, P., & Landolt, H. P. (2012). The BDNF Val66Met polymorphism modulates sleep intensity: EEG frequency- and state-specificity. *Sleep*, *35*(3), 335-344. doi:10.5665/sleep.1690
- Barclay, N. L., Eley, T. C., Mill, J., Wong, C. C., Zavos, H. M., Archer, S. N., & Gregory, A. M. (2011). Sleep quality and diurnal preference in a sample of young adults: associations with 5HTTLPR, PER3, and CLOCK 3111. *Am J Med Genet B Neuropsychiatr Genet*, *156b*(6), 681-690. doi:10.1002/ajmg.b.31210
- Bodenmann, S., Rusterholz, T., Durr, R., Stoll, C., Bachmann, V., Geissler, E., . . . Landolt, H. P. (2009). The functional Val158Met polymorphism of COMT predicts interindividual differences in brain alpha oscillations in young men. *J Neurosci*, *29*(35), 10855-10862. doi:10.1523/jneurosci.1427-09.2009
- Craig, D., Hart, D. J., & Passmore, A. P. (2006). Genetically increased risk of sleep disruption in Alzheimer's disease. *Sleep*, *29*(8), 1003-1007.
- Doong, S. H., Dhruva, A., Dunn, L. B., West, C., Paul, S. M., Cooper, B. A., . . . Miaskowski, C. (2015). Associations between cytokine genes and a symptom cluster of pain, fatigue, sleep disturbance, and depression in patients prior to breast cancer surgery. *Biol Res Nurs*, *17*(3), 237-247. doi:10.1177/1099800414550394
- Geoffroy, P. A., Boudebesse, C., Henrion, A., Jamain, S., Henry, C., Leboyer, M., . . . Etain, B. (2014). An ASMT variant associated with bipolar disorder influences sleep and circadian rhythms: a pilot study. *Genes Brain Behav*, *13*(3), 299-304. doi:10.1111/gbb.12103
- Gottlieb, D. J., Hek, K., Chen, T. H., Watson, N. F., Eiriksdottir, G., Byrne, E. M., . . . Tiemeier, H. (2015). Novel loci associated with usual sleep duration: the CHARGE Consortium Genome-Wide Association Study. *Mol Psychiatry*, *20*(10), 1232-1239. doi:10.1038/mp.2014.133
- Guindalini, C., Mazzotti, D. R., Castro, L. S., D'Aurea, C. V., Andersen, M. L., Poyares, D., . . . Tufik, S. (2014). Brain-derived neurotrophic factor gene polymorphism predicts interindividual variation in the sleep electroencephalogram. *J Neurosci Res*, *92*(8), 1018-1023. doi:10.1002/jnr.23380
- Hartmann, J. A., Wichers, M., van Bemmelen, A. L., Derom, C., Thiery, E., Jacobs, N., . . . Simons, C. J. (2014). The serotonin transporter 5-HTTLPR polymorphism in the association between sleep quality and affect. *Eur Neuropsychopharmacol*, *24*(7), 1086-1090. doi:10.1016/j.euroneuro.2014.01.015
- Holst, S. C., Bersagliere, A., Bachmann, V., Berger, W., Achermann, P., & Landolt, H. P. (2014). Dopaminergic role in regulating neurophysiological markers of sleep homeostasis in humans. *J Neurosci*, *34*(2), 566-573. doi:10.1523/jneurosci.4128-13.2014
- Illi, J., Miaskowski, C., Cooper, B., Levine, J. D., Dunn, L., West, C., . . . Aouizerat, B. E. (2012). Association between pro- and anti-inflammatory cytokine genes and a symptom cluster of pain, fatigue, sleep disturbance, and depression. *Cytokine*, *58*(3), 437-447. doi:10.1016/j.cyto.2012.02.015
- Jimenez, K. M., Pereira-Morales, A. J., & Forero, D. A. (2017). Val158Met polymorphism in the COMT gene is associated with hypersomnia and mental health-related quality of life in a Colombian sample. *Neurosci Lett*, *644*, 43-47. doi:10.1016/j.neulet.2017.02.050



- Maire, M., Reichert, C. F., Gabel, V., Viola, A. U., Phillips, C., Krebs, J., . . . Schmidt, C. (2015). Fighting Sleep at Night: Brain Correlates and Vulnerability to Sleep Loss. *Ann Neurol*, *78*(2), 235-247. doi:10.1002/ana.24434
- Mansour, H. A., Wood, J., Chowdari, K. V., Tumuluru, D., Bamne, M., Monk, T. H., . . . Nimgaonkar, V. L. (2017). Associations between period 3 gene polymorphisms and sleep- /chronotype-related variables in patients with late-life insomnia. *Chronobiol Int*, *34*(5), 624-631. doi:10.1080/07420528.2017.1287083
- Miaskowski, C., Dodd, M., Lee, K., West, C., Paul, S. M., Cooper, B. A., . . . Aouizerat, B. E. (2010). Preliminary evidence of an association between a functional interleukin-6 polymorphism and fatigue and sleep disturbance in oncology patients and their family caregivers. *J Pain Symptom Manage*, *40*(4), 531-544. doi:10.1016/j.jpainsymman.2009.12.006
- Ojeda, D. A., Nino, C. L., Lopez-Leon, S., Camargo, A., Adan, A., & Forero, D. A. (2014). A functional polymorphism in the promoter region of MAOA gene is associated with daytime sleepiness in healthy subjects. *J Neurol Sci*, *337*(1-2), 176-179. doi:10.1016/j.jns.2013.12.005
- Ojeda, D. A., Perea, C. S., Nino, C. L., Gutierrez, R. M., Lopez-Leon, S., Arboleda, H., . . . Forero, D. A. (2013). A novel association of two non-synonymous polymorphisms in PER2 and PER3 genes with specific diurnal preference subscales. *Neurosci Lett*, *553*, 52-56. doi:10.1016/j.neulet.2013.08.016
- Perea, C. S., Nino, C. L., Lopez-Leon, S., Gutierrez, R., Ojeda, D., Arboleda, H., . . . Forero, D. A. (2014). Study of a Functional Polymorphism in the PER3 Gene and Diurnal Preference in a Colombian Sample. *Open Neurol J*, *8*, 7-10. doi:10.2174/1874205x01408010007
- Reichert, C. F., Maire, M., Gabel, V., Hofstetter, M., Viola, A. U., Kolodyazhniy, V., . . . Schmidt, C. (2014). The circadian regulation of sleep: impact of a functional ADA-polymorphism and its association to working memory improvements. *PLoS One*, *9*(12), e113734. doi:10.1371/journal.pone.0113734
- Rezey, J. V., Adam, M., Honegger, E., Khatami, R., Luhmann, U. F., Jung, H. H., . . . Landolt, H. P. (2005). A functional genetic variation of adenosine deaminase affects the duration and intensity of deep sleep in humans. *Proc Natl Acad Sci U S A*, *102*(43), 15676-15681. doi:10.1073/pnas.0505414102
- Song, H. M., Cho, C. H., Lee, H. J., Moon, J. H., Kang, S. G., Yoon, H. K., . . . Kim, L. (2016). Association of CLOCK, ARNTL, PER2, and GNB3 polymorphisms with diurnal preference in a Korean population. *Chronobiol Int*, *33*(10), 1455-1463. doi:10.1080/07420528.2016.1231199
- Spada, J., Sander, C., Burkhardt, R., Hantzsch, M., Mergl, R., Scholz, M., . . . Hensch, T. (2014). Genetic association of objective sleep phenotypes with a functional polymorphism in the neuropeptide S receptor gene. *PLoS One*, *9*(6), e98789. doi:10.1371/journal.pone.0098789
